# Supplementary material for: Measuring local pH at interfaces from molecular tumbling: A concept for designing EPR-active pH-sensitive labels and probes
Source: Royal Society of Chemistry journal article supplement (doi:10.1039/d4ob00167b), 2024-01-01
Supplement: d4ob00167b1.pdf [file d4ob00167b1.pdf]

## Supplementary Information for the manuscript “Measuring Local pH at Interfaces from Molecular Tumbling: A Concept for Designing EPR-active pH-sensitive Labels and Probes”

Maxim A. Voinov, Nicholas Nunn, Roshan Rana, Atli Davidsson, Alex I. Smirnov, and Tatyana I. Smirnova

Department of Chemistry, North Carolina State University, 2620 Yarbrough Drive, Raleigh, North Carolina 27695-8204, United States

|                                                                                                                         |     |
|-------------------------------------------------------------------------------------------------------------------------|-----|
| <u>Experimental data for potentiometric titration</u> .....                                                             | S1  |
| <u>High resolution mass spectrometry and infrared spectroscopy data for:</u>                                            |     |
| <b>3-tert-Butoxycarbonylamino-1-oxyl-2,2,5,5-tetramethylpyrrolidine-4-carboxylic acid (N-Boc POAC, 6)</b> .....         | S2  |
| <b>3-tert-Butoxycarbonylamino-4-hydroxymethyl-1-oxyl-2,2,5,5-tetramethylpyrrolidine 8</b> .....                         | S6  |
| <b>3-Amino-4-hydroxymethyl-1-oxyl-2,2,5,5-tetramethylpyrrolidine 9</b> .....                                            | S8  |
| <b>3-Dimethylamino-4-hydroxymethyl-1-oxyl-2,2,5,5-tetramethylpyrrolidine 10</b> .....                                   | S11 |
| <b>Methanesulfonic acid (4-dimethylamino-1-oxyl-2,2,5,5-tetramethyl-pyrrolidin-3-yl)-methyl ester 11</b> .....          | S14 |
| <b>3-Bromomethyl-4-dimethylamino-1-oxyl-2,2,5,5-tetramethylpyrrolidine 13</b> .....                                     | S17 |
| <b>3-Dimethylamino-4-iodomethyl-1-oxyl-2,2,5,5-tetramethylpyrrolidine 14</b> .....                                      | S21 |
| <b>3-Azidomethyl-4-dimethylamino-1-oxyl-2,2,5,5-tetramethylpyrrolidine 15</b> .....                                     | S24 |
| <b>Adduct 16</b> .....                                                                                                  | S27 |
| <b>3-Dimethylamino-1-oxyl-2,2,5,5-tetramethyl-4-[2-(tetrahydropyran-2-yloxy)-ethoxymethyl]-pyrrolidine 17</b> .....     | S31 |
| <b>3-Dimethylamino-4-(2-hydroxy-ethoxymethyl)-1-oxyl-2,2,5,5-tetramethylpyrrolidine 18</b> .....                        | S33 |
| <b>2-((4-(Dimethylamino)-1-oxyl-2,2,5,5-tetramethylpyrrolidin-3-yl)methoxy)ethyl methanesulfonate 19</b> .....          | S36 |
| <b>S-(2-((4-(dimethylamino)-1-oxyl-2,2,5,5-tetramethylpyrrolidin-3-yl)methoxy)ethyl) methanesulfonothioate 20</b> ..... | S39 |

|                                                                                                                                               |            |
|-----------------------------------------------------------------------------------------------------------------------------------------------|------------|
| <b>(2-Bromoethyl)carbamic acid (4-dimethylamino-1-oxyl-2,2,5,5-tetramethylpyrrolidin-3-yl)-methyl ester 21</b> .....                          | <b>S46</b> |
| <b>(2-((Methylsulfonyl)thio)ethyl)carbamic acid (4-(dimethylamino)-1-oxyl-2,2,5,5-tetramethylpyrrolidin-3-yl)methyl ester 22</b> .....        | <b>S50</b> |
| <b>Spin-labeled 1,2-dipalmitoyl-sn-glycero-3-phosphothioethanol (22-PTE)</b> .....                                                            | <b>S53</b> |
| <b>Spin-labeled 1,2-dipalmitoyl-sn-glycero-3-phosphothioethanol (20-PTE)</b> .....                                                            | <b>S42</b> |
| <b>Spin-labeled 1,2-dioleoyl-sn-glycero-3-phosphoethanolamine (23-DOPE)</b> .....                                                             | <b>S56</b> |
| <b>2-((2-Hydroxyethyl)-disulfaneyl)ethyl)carbamic acid (4-(dimethylamino)-1-oxyl-2,2,5,5-tetramethylpyrrolidin-3-yl)methyl ester 24</b> ..... | <b>S60</b> |
| <b>3-(Dimethylamino)-4-((2-((2-hydroxyethyl)disulfaneyl)ethoxy)methyl)-2,2,5,5-tetramethylpyrrolidin-1-oxyl 25</b> .....                      | <b>S63</b> |
| <b>3-(2-Hydroxyethylamino)-1-oxyl-2,2,5,5-tetramethylpyrrolidine 26</b> .....                                                                 | <b>S66</b> |

Experimental Electron Paramagnetic Resonance (EPR) spectra:

|                                                                                                                                           |            |
|-------------------------------------------------------------------------------------------------------------------------------------------|------------|
| <b>3-Dimethylamino-4-hydroxymethyl-1-oxyl-2,2,5,5-tetramethylpyrrolidine 10</b> .....                                                     | <b>S69</b> |
| <b>3-Dimethylamino-4-hydroxymethyl-1-oxyl-2,2,5,5-tetramethylpyrrolidine 10 in 50 mM NaCl solution</b> .....                              | <b>S70</b> |
| <b>3-Azidomethyl-4-dimethylamino-1-oxyl-2,2,5,5-tetramethylpyrrolidine 15</b> .....                                                       | <b>S71</b> |
| <b>Adduct 16</b> .....                                                                                                                    | <b>S72</b> |
| <b>3-Dimethylamino-4-(2-hydroxy-ethoxymethyl)-1-oxyl-2,2,5,5-tetramethylpyrrolidine 18</b> .....                                          | <b>S73</b> |
| <b>[2-(2-Hydroxyethyl)disulfanyl]-ethyl]-carbamic acid 4-dimethylamino-1-oxyl-2,2,5,5-tetramethylpyrrolidin-3-ylmethyl ester 24</b> ..... | <b>S74</b> |
| <b>3-Dimethylamino-4-[2-(2-hydroxyethyl)disulfanyl]-ethoxymethyl]-1-oxyl-2,2,5,5-tetramethylpyrrolidine 25</b> .....                      | <b>S75</b> |
| <b>3-(2-Hydroxyethylamino)-1-oxyl-2,2,5,5-tetramethylpyrrolidine 26</b> .....                                                             | <b>S76</b> |

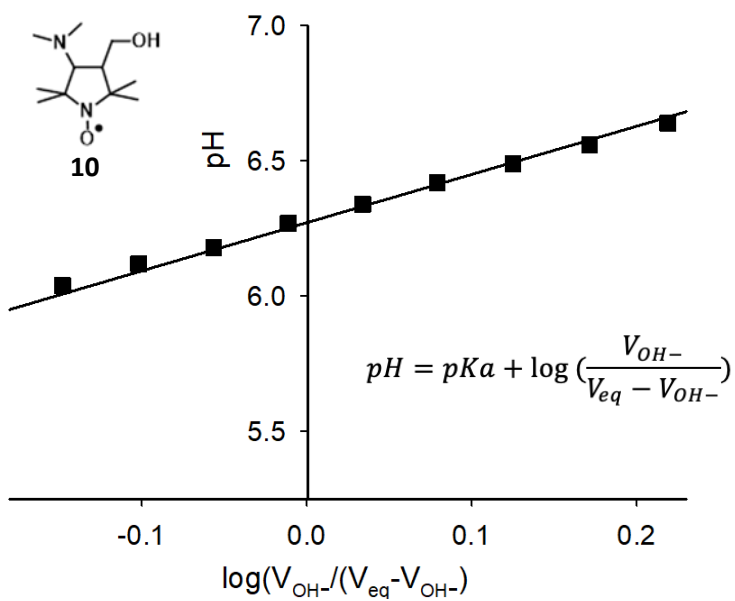

**Figure S1.** Determination of  $pK_a$  of dimethylamino nitroxide **10** by potentiometric titration. The linear fit gives  $pK_a = 6.27 \pm 0.06$ .

High resolution mass spectrometry and infrared spectroscopy data for 3-*tert*-Butoxycarbonyl-amino-1-oxyl-2,2,5,5-tetramethylpyrrolidine-4-carboxylic acid (*N*-Boc POAC, **6**)

**Full Scan Positive Ion Mode**

| Sample | M <sub>Theoretical</sub> | M <sub>Experimental</sub> | ΔM (ppm) | Elemental Composition                                         |
|--------|--------------------------|---------------------------|----------|---------------------------------------------------------------|
|        | 301.17580                | 301.17581                 | 0.04767  | C <sub>14</sub> H <sub>25</sub> N <sub>2</sub> O <sub>5</sub> |
|        | [M] <sup>+</sup>         | [M] <sup>+</sup>          |          |                                                               |
|        | 340.13951                | 340.13951                 | 0.01073  | [M]                                                           |
|        | [M+K] <sup>+</sup>       | [M+K] <sup>+</sup>        |          |                                                               |

173731\_MAV-673 #81-148 RT: 0.36-0.66 AV: 68 NL: 2.55E9

T: FTMS + p ESI Full ms [100.00-750.00]

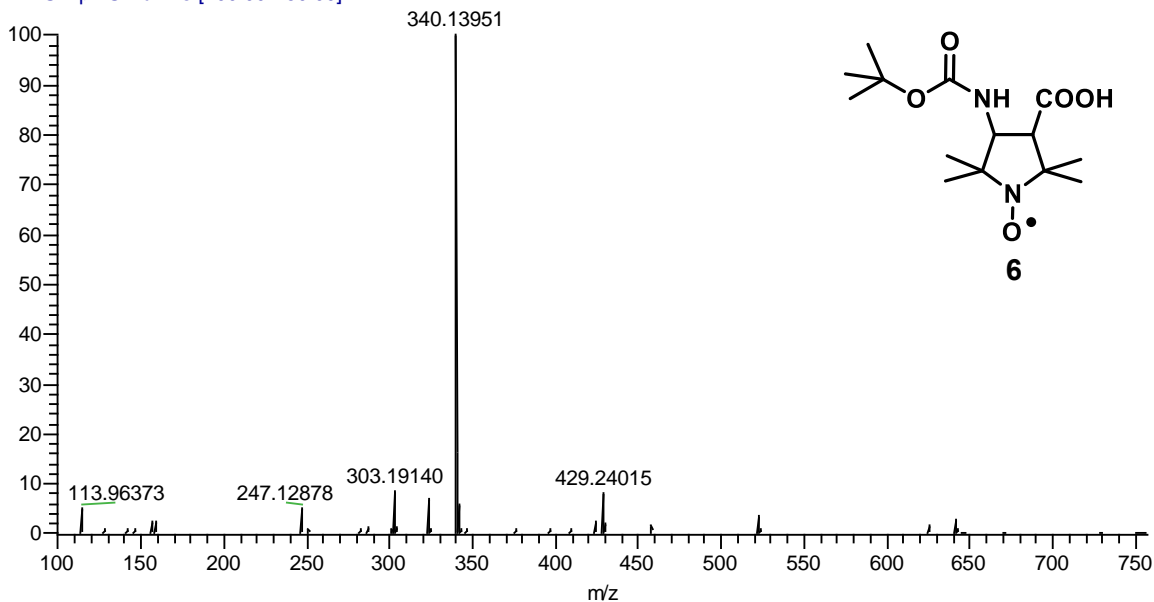

**Experimental and Theoretical Isotopic Distribution C<sub>14</sub>H<sub>25</sub>N<sub>2</sub>O<sub>5</sub> [M]<sup>+</sup>**

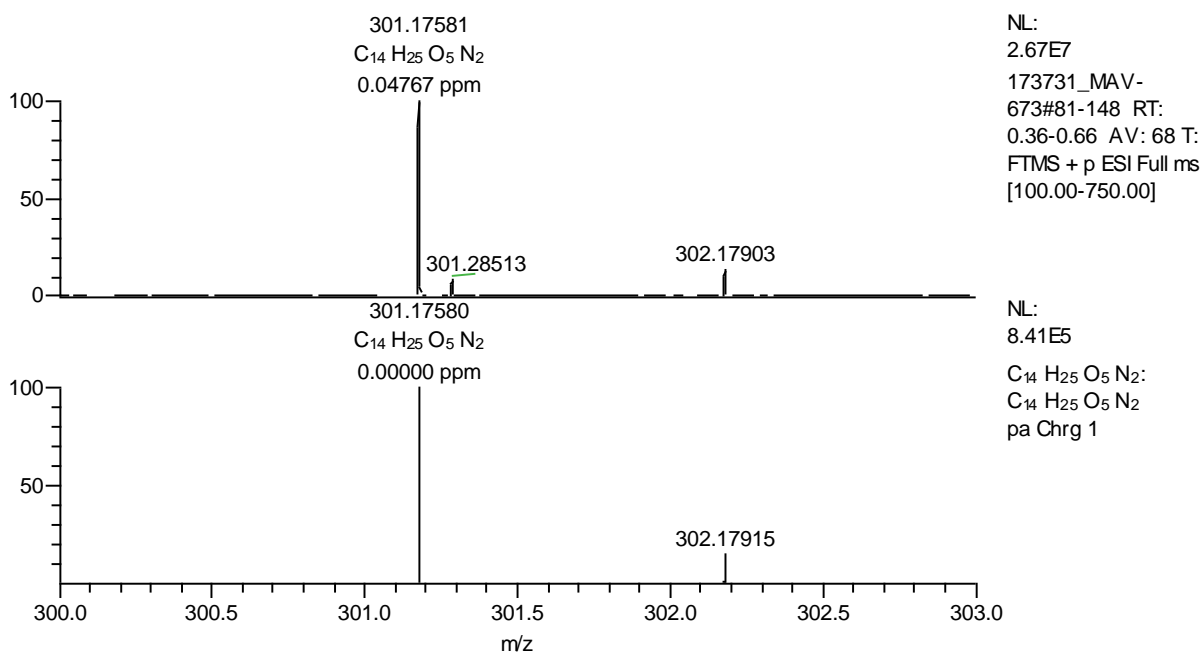



**Experimental and Theoretical Isotopic Distribution C<sub>14</sub>H<sub>25</sub>N<sub>2</sub>O<sub>5</sub>K [M+K]<sup>+</sup>**

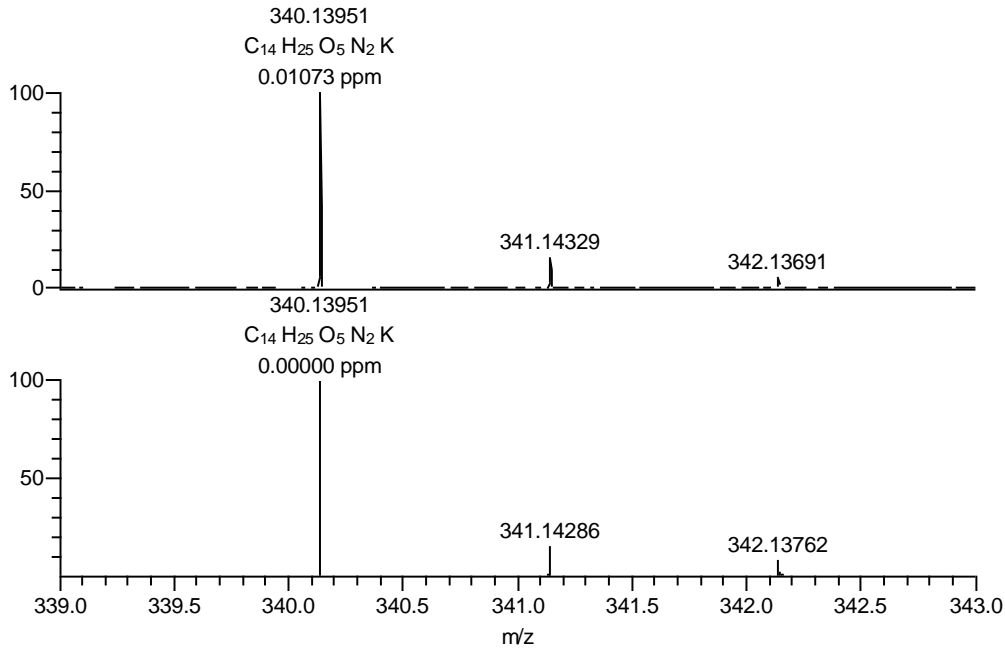

NL:  
2.55E9  
173731\_MAV-  
673#81-148 RT:  
0.36-0.66 AV: 68 T:  
FTMS + p ESI Full ms  
[100.00-750.00]

NL:  
7.84E5  
C<sub>14</sub> H<sub>25</sub> O<sub>5</sub> N<sub>2</sub> +K:  
C<sub>14</sub> H<sub>25</sub> O<sub>5</sub> N<sub>2</sub> K<sub>1</sub>  
pa Chrg 1

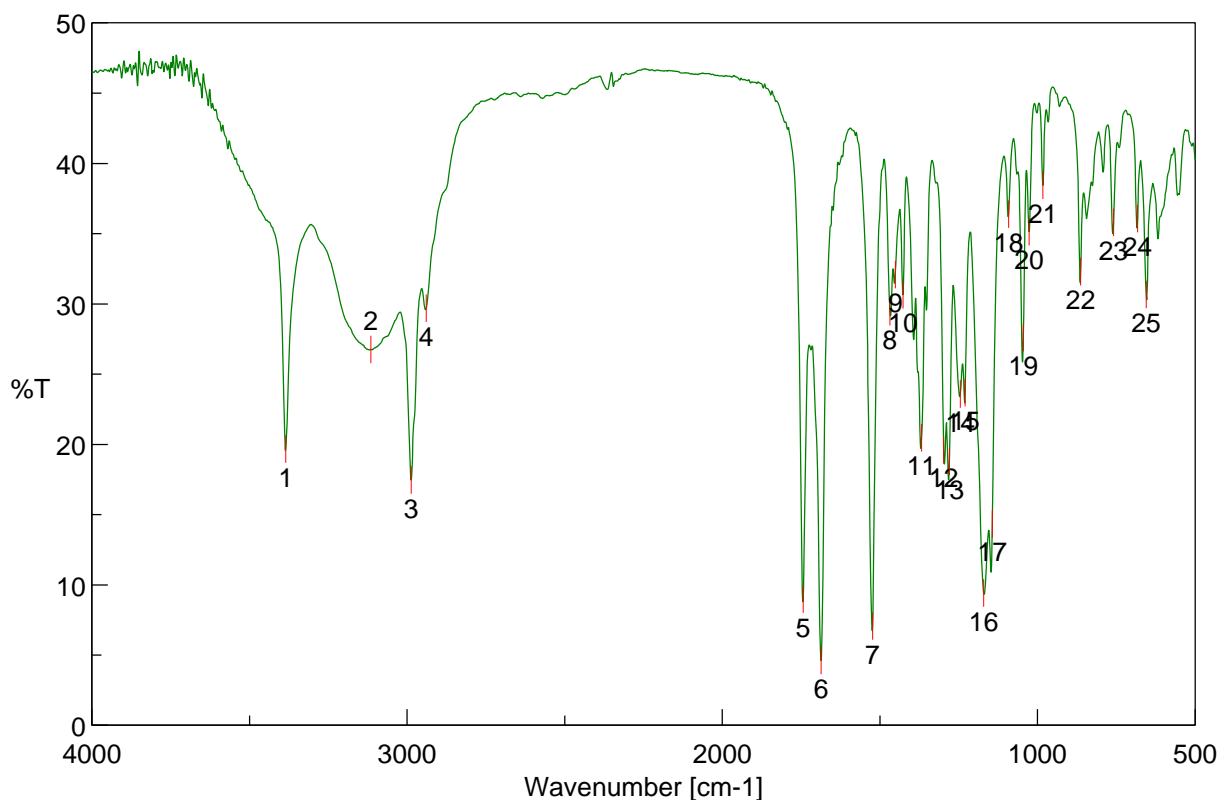

[Comments]

Sample name  
 Comment  
 User  
 Division  
 Company            Microsoft

[Detailed Information]

Creation date        8/28/2017 8:38 PM  
 Data array type     Linear data array  
 Horizontal axis      Wavenumber [cm-1]  
 Vertical axis        %T  
 Start                499.473 cm-1  
 End                  4000.6 cm-1  
 Data interval        0.964233 cm-1  
 Data points         3632

[Measurement Information]

Model Name          FT/IR-4100typeA  
 Serial Number        B096961016  
 Measurement Date   8/28/2017 8:38 PM  
 Light Source         Standard  
 Detector             TGS  
 Accumulation        20  
 Resolution           4 cm-1  
 Zero Filling         On  
 Apodization         Cosine  
 Gain                  Auto (4)  
 Aperture             Auto (7.1 mm)  
 Scanning Speed     Auto (2 mm/sec)  
 Filter                 Auto (30000 Hz)

[ Result of Peak Picking ]

| No. | Position | Intensity | No. | Position | Intensity |
|-----|----------|-----------|-----|----------|-----------|
| 1   | 3384.46  | 19.6689   | 2   | 3114.47  | 26.7471   |

[ Result of Peak Picking ]

| No. | Position | Intensity | No. | Position | Intensity |
|-----|----------|-----------|-----|----------|-----------|
| 3   | 2987.2   | 17.4446   | 4   | 2938.98  | 29.6795   |
| 5   | 1743.33  | 8.98157   | 6   | 1686.44  | 4.6024    |
| 7   | 1523.49  | 7.06293   | 8   | 1468.53  | 29.4202   |
| 9   | 1451.17  | 32.084    | 10  | 1427.07  | 30.6492   |
| 11  | 1368.25  | 20.4632   | 12  | 1297.86  | 19.6115   |
| 13  | 1279.54  | 18.7646   | 14  | 1244.83  | 23.5722   |
| 15  | 1229.4   | 23.6632   | 16  | 1170.58  | 9.40426   |
| 17  | 1143.58  | 14.3182   | 18  | 1091.51  | 36.3771   |
| 19  | 1045.23  | 27.5855   | 20  | 1026.91  | 35.1315   |
| 21  | 983.518  | 38.4192   | 22  | 862.989  | 32.2784   |
| 23  | 758.852  | 35.78     | 24  | 682.677  | 36.0553   |
| 25  | 655.679  | 30.6668   |     |          |           |

High resolution mass spectrometry and infrared spectroscopy data for 3-*tert*-Butoxycarbonyl-amino-4-hydroxymethyl-1-oxyl-2,2,5,5-tetramethylpyrrolidine **8**

**Full Scan Positive Ion Mode**

| Sample | M <sub>Theoretical</sub> | M <sub>Experimental</sub> | ΔM (ppm) | Elemental Composition                                         |
|--------|--------------------------|---------------------------|----------|---------------------------------------------------------------|
|        | 287.19653                | 287.19621                 | -1.138   | C <sub>14</sub> H <sub>27</sub> N <sub>2</sub> O <sub>4</sub> |
|        | [M] <sup>+</sup>         | [M] <sup>+</sup>          |          |                                                               |

174163\_MAV678b #49-63 RT: 0.36-0.44 AV: 15 SB: 57 0.01-0.19 , 0.80-1.01 NL: 9.07E6  
T: FTMS + p ESI Full ms [180.00-1000.00]

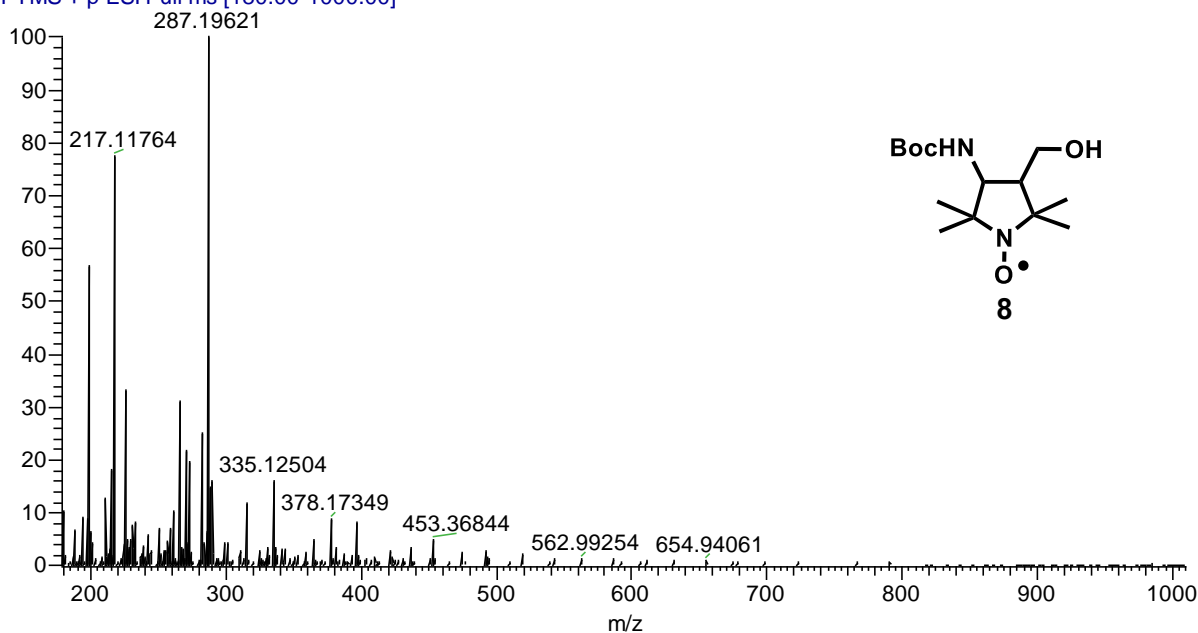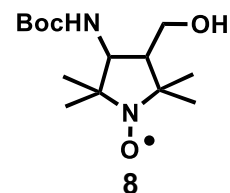

**Experimental and Theoretical Isotopic Distribution C<sub>14</sub>H<sub>27</sub>N<sub>2</sub>O<sub>4</sub> [M+H]<sup>+</sup>**

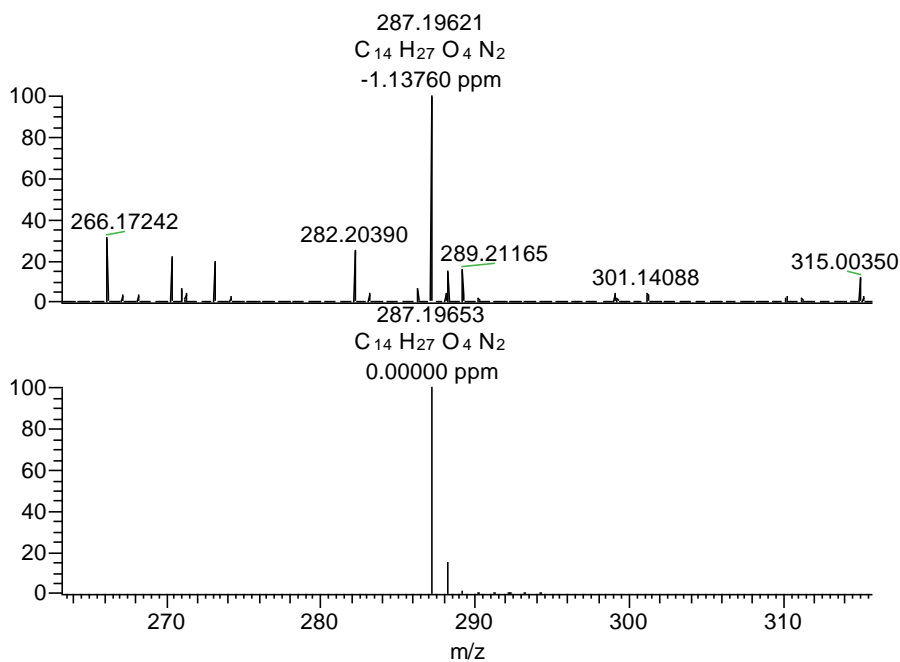

NL:  
9.07E6  
174163\_MAV678b#49-63 RT:  
0.36-0.44 AV: 15 SB: 57  
0.01-0.19 , 0.80-1.01 T:  
FTMS + p ESI Full ms  
[180.00-1000.00]

NL:  
8.43E5  
C<sub>14</sub> H<sub>27</sub> N<sub>2</sub> O<sub>4</sub>:  
C<sub>14</sub> H<sub>27</sub> N<sub>2</sub> O<sub>4</sub>  
pa Chrg 1



High resolution mass spectrometry and infrared spectroscopy data for 3-Amino-4-hydroxymethyl-1-oxyl-2,2,5,5-tetramethylpyrrolidine **9**

**Full Scan Positive Ion Mode**

| Sample | M <sub>Theoretical</sub> | M <sub>Experimental</sub> | ΔM (ppm) | Elemental Composition                                        |
|--------|--------------------------|---------------------------|----------|--------------------------------------------------------------|
|        | 188.15193                | 188.15146                 | -2.511   | C <sub>9</sub> H <sub>19</sub> N <sub>2</sub> O <sub>2</sub> |
|        | [M+H] <sup>+</sup>       | [M+H] <sup>+</sup>        |          |                                                              |

174746\_MAV682 #54-82 RT: 0.31-0.46 ,  
T: FTMS + p ESI Full ms [50.00-750.00]

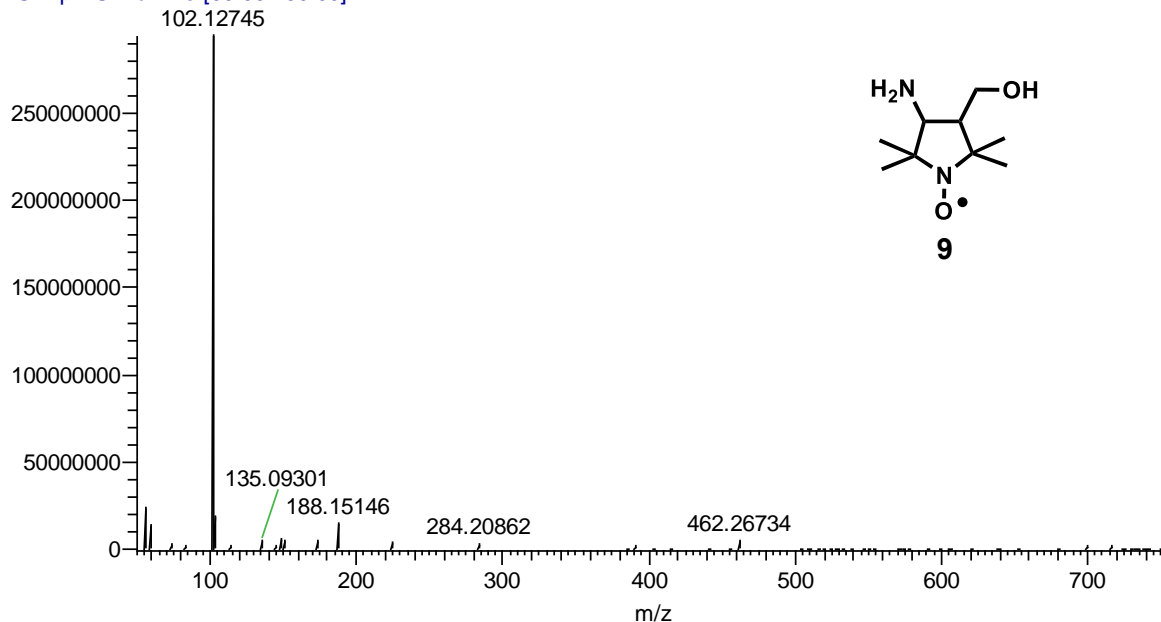

**Experimental and Theoretical Isotopic Distribution for C<sub>9</sub>H<sub>19</sub>N<sub>2</sub>O<sub>2</sub> [M+H]<sup>+</sup>**

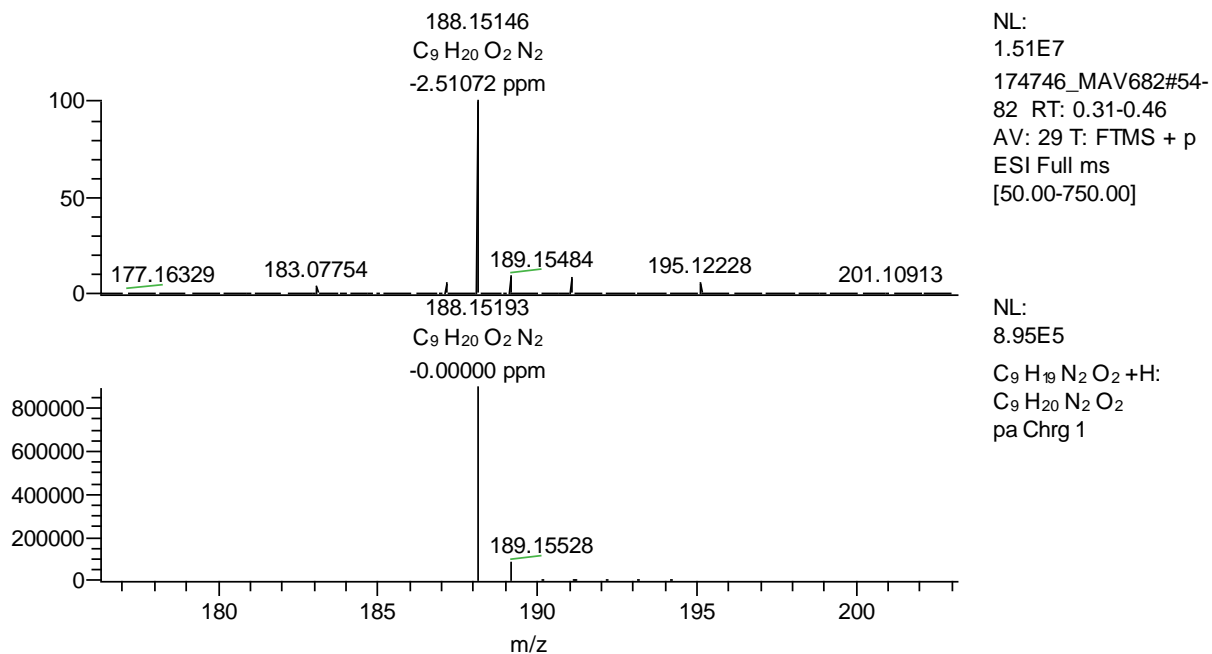

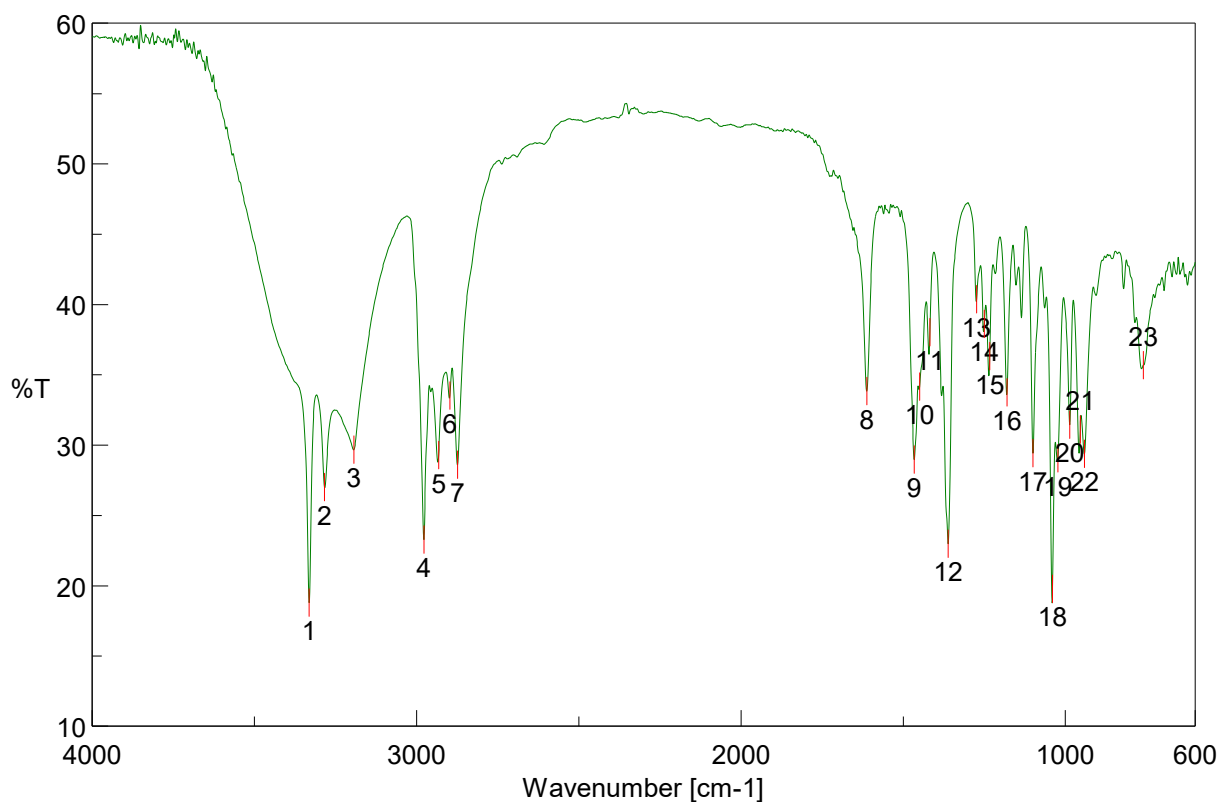

[Comments]

Sample name  
 Comment  
 User  
 Division  
 Company NCSU

[Detailed Information]

Creation date 9/23/2022 5:39 PM  
 Data array type Linear data array  
 Horizontal axis Wavenumber [cm-1]  
 Vertical axis %T  
 Start 0 cm-1  
 End 7800.65 cm-1  
 Data interval 0.964233 cm-1  
 Data points 8091

[Measurement Information]

Model Name FT/IR-4100typeA  
 Serial Number B096961016  
 Measurement Date 9/23/2022 5:38 PM  
 Light Source Standard  
 Detector TGS  
 Accumulation 8  
 Resolution 4 cm-1  
 Zero Filling On  
 Apodization Cosine  
 Gain Auto (4)  
 Aperture Auto (7.1 mm)  
 Scanning Speed Auto (2 mm/sec)  
 Filter Auto (30000 Hz)

[ Result of Peak Picking ]

| No. | Position | Intensity | No. | Position | Intensity |
|-----|----------|-----------|-----|----------|-----------|
| 1   | 3331.43  | 18.776    | 2   | 3284.18  | 26.9994   |

[ Result of Peak Picking ]

| No. | Position | Intensity | No. | Position | Intensity |
|-----|----------|-----------|-----|----------|-----------|
| 3   | 3193.54  | 29.6562   | 4   | 2977.55  | 23.2732   |
| 5   | 2932.23  | 29.268    | 6   | 2897.52  | 33.515    |
| 7   | 2873.42  | 28.5947   | 8   | 1612.2   | 33.8309   |
| 9   | 1465.63  | 28.9515   | 10  | 1449.24  | 34.1503   |
| 11  | 1417.42  | 38.0088   | 12  | 1361.5   | 22.9733   |
| 13  | 1273.75  | 40.3531   | 14  | 1249.65  | 38.614    |
| 15  | 1233.25  | 36.3135   | 16  | 1180.22  | 33.7386   |
| 17  | 1100.19  | 29.424    | 18  | 1039.44  | 19.7724   |
| 19  | 1023.05  | 29.0425   | 20  | 986.411  | 31.4446   |
| 21  | 954.591  | 31.1062   | 22  | 941.092  | 29.3567   |
| 23  | 759.816  | 35.6806   |     |          |           |



High resolution mass spectrometry and infrared spectroscopy data for 3-Dimethylamino-4-hydroxymethyl-1-oxyl-2,2,5,5-tetramethylpyrrolidine **10**

**Full Scan Positive Ion Mode**

| Sample | M <sub>Theoretical</sub> | M <sub>Experimental</sub> | ΔM (ppm) | Elemental Composition                                         |
|--------|--------------------------|---------------------------|----------|---------------------------------------------------------------|
|        | 216.18323                | 216.18314                 | -0.432   | C <sub>11</sub> H <sub>23</sub> N <sub>2</sub> O <sub>2</sub> |
|        | [M+H] <sup>+</sup>       | [M+H] <sup>+</sup>        |          |                                                               |

192701\_MAV\_752 #46-73 RT: 0.26-0.40 AV: 28 NL: 5.35E8

T: FTMS + p ESI Full ms [100.0000-800.0]

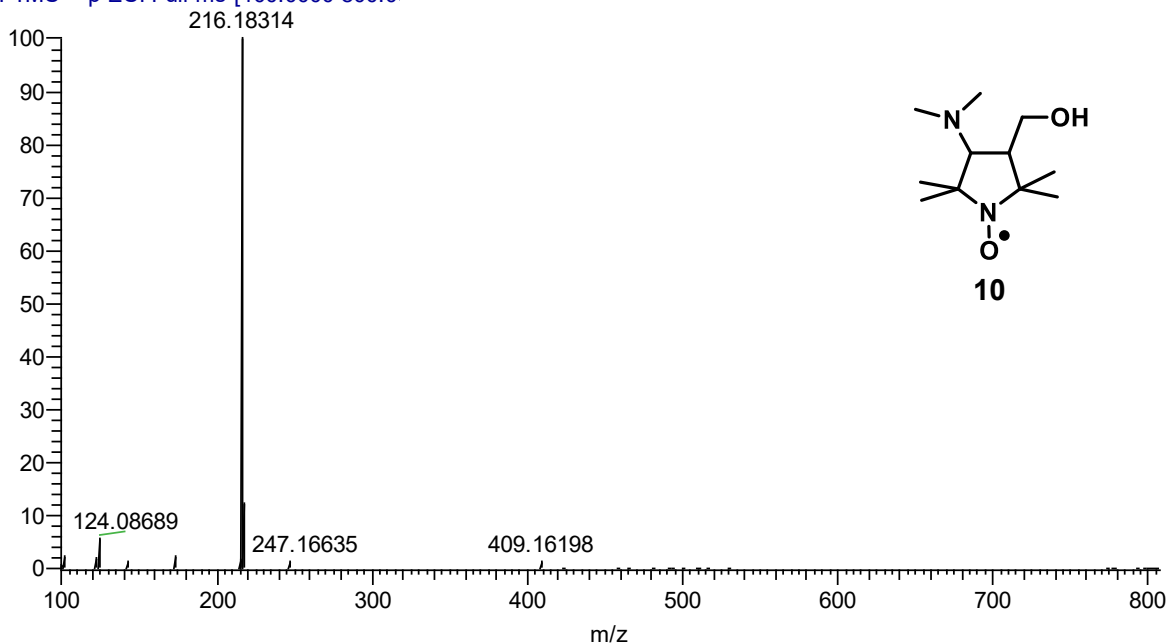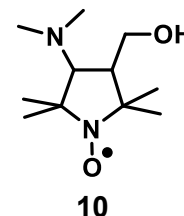

**Experimental and Theoretical Isotopic Distribution C<sub>11</sub>H<sub>23</sub>N<sub>2</sub>O<sub>2</sub> [M+H]<sup>+</sup>**

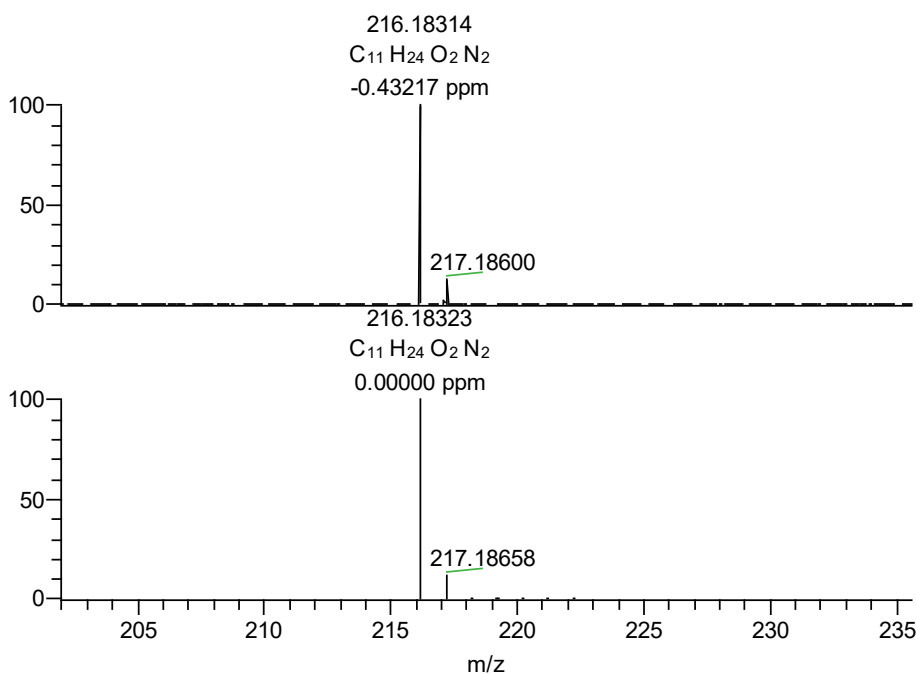

NL:  
5.35E8  
192701\_MAV\_752#46-  
73 RT: 0.26-0.40 AV:  
28 T: FTMS + p ESI  
Full ms  
[100.0000-800.0000]

NL:  
8.75E5  
C<sub>11</sub>H<sub>23</sub>N<sub>2</sub>O<sub>2</sub> +H:  
C<sub>11</sub>H<sub>24</sub>N<sub>2</sub>O<sub>2</sub>  
pa Chrg 1

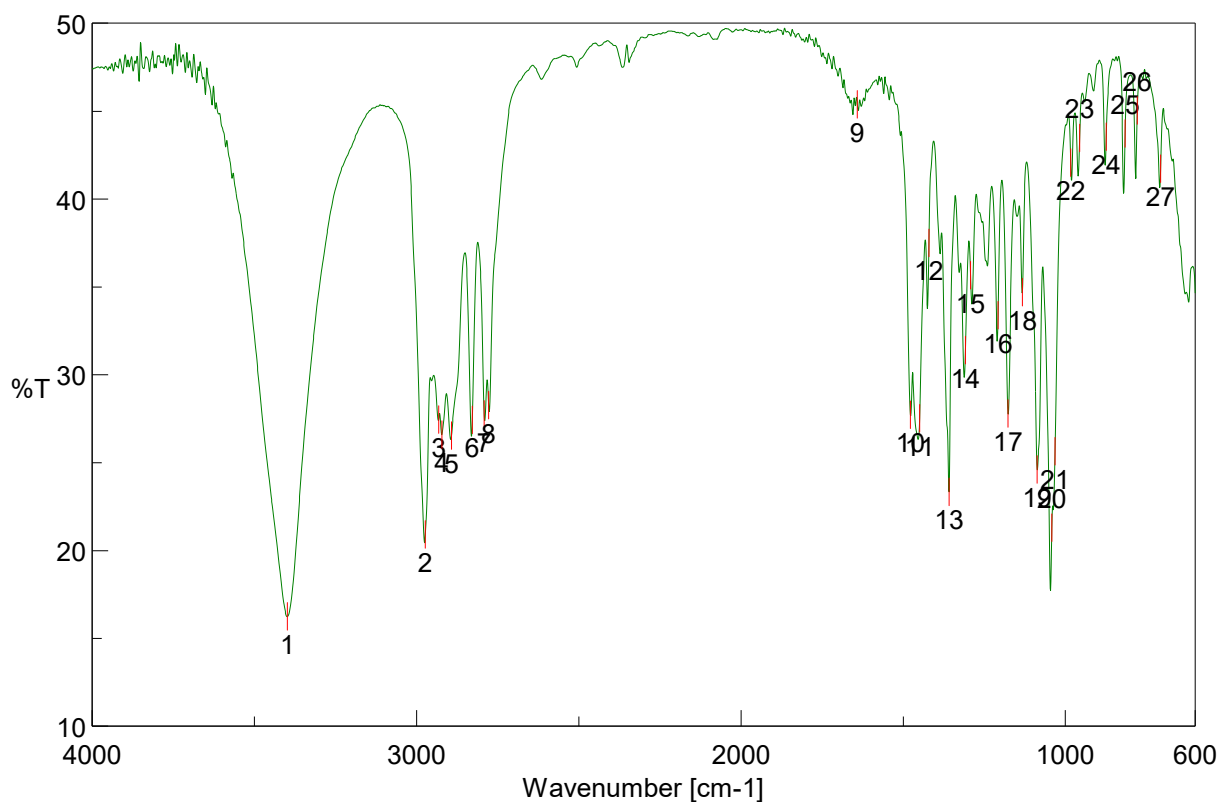

[Comments]

Sample name  
 Comment  
 User  
 Division  
 Company NCSU

[Detailed Information]

Creation date 9/26/2022 7:26 PM  
 Data array type Linear data array  
 Horizontal axis Wavenumber [cm-1]  
 Vertical axis %T  
 Start 0 cm-1  
 End 7800.65 cm-1  
 Data interval 0.964233 cm-1  
 Data points 8091

[Measurement Information]

Model Name FT/IR-4100typeA  
 Serial Number B096961016  
 Measurement Date 9/26/2022 7:26 PM  
 Light Source Standard  
 Detector TGS  
 Accumulation 8  
 Resolution 4 cm-1  
 Zero Filling On  
 Apodization Cosine  
 Gain Auto (4)  
 Aperture Auto (7.1 mm)  
 Scanning Speed Auto (2 mm/sec)  
 Filter Auto (30000 Hz)

[ Result of Peak Picking ]

| No. | Position | Intensity | No. | Position | Intensity |
|-----|----------|-----------|-----|----------|-----------|
| 1   | 3397.96  | 16.2407   | 2   | 2972.73  | 20.8991   |

[ Result of Peak Picking ]

| No. | Position | Intensity | No. | Position | Intensity |
|-----|----------|-----------|-----|----------|-----------|
| 3   | 2932.23  | 27.4441   | 4   | 2921.63  | 26.5851   |
| 5   | 2892.7   | 26.5285   | 6   | 2828.1   | 27.4237   |
| 7   | 2791.46  | 27.7268   | 8   | 2777.96  | 28.259    |
| 9   | 1641.13  | 45.374    | 10  | 1478.17  | 27.7189   |
| 11  | 1449.24  | 27.5218   | 12  | 1420.32  | 37.5005   |
| 13  | 1358.6   | 23.3198   | 14  | 1308.46  | 31.385    |
| 15  | 1292.07  | 35.6568   | 16  | 1207.22  | 33.3774   |
| 17  | 1177.33  | 27.7907   | 18  | 1132.97  | 34.6964   |
| 19  | 1087.66  | 24.6011   | 20  | 1042.34  | 21.2927   |
| 21  | 1031.73  | 25.6384   | 22  | 983.518  | 42.0692   |
| 23  | 956.52   | 43.4625   | 24  | 874.56   | 43.5401   |
| 25  | 815.742  | 43.7109   | 26  | 778.136  | 45.0303   |
| 27  | 706.783  | 41.7072   |     |          |           |

High resolution mass spectrometry and infrared spectroscopy data for Methanesulfonic acid (4-dimethylamino-2,2,5,5-tetramethylpyrrolidin-3-yl)-methyl ester **11**

**Full Scan Positive Ion Mode**

| Sample | M <sub>Theoretical</sub> | M <sub>Experimental</sub> | ΔM (ppm) | Elemental Composition                                           |
|--------|--------------------------|---------------------------|----------|-----------------------------------------------------------------|
|        | 294.16078                | 294.16035                 | -1.450   | C <sub>12</sub> H <sub>25</sub> N <sub>2</sub> O <sub>4</sub> S |
|        | [M+H] <sup>+</sup>       | [M+H] <sup>+</sup>        |          |                                                                 |

200086\_MAV-757 #48-70 RT: 0.29-0.40 AV: 23 NI: 7.54F8

T: FTMS + p ESI Full ms [200.0000-1000.C

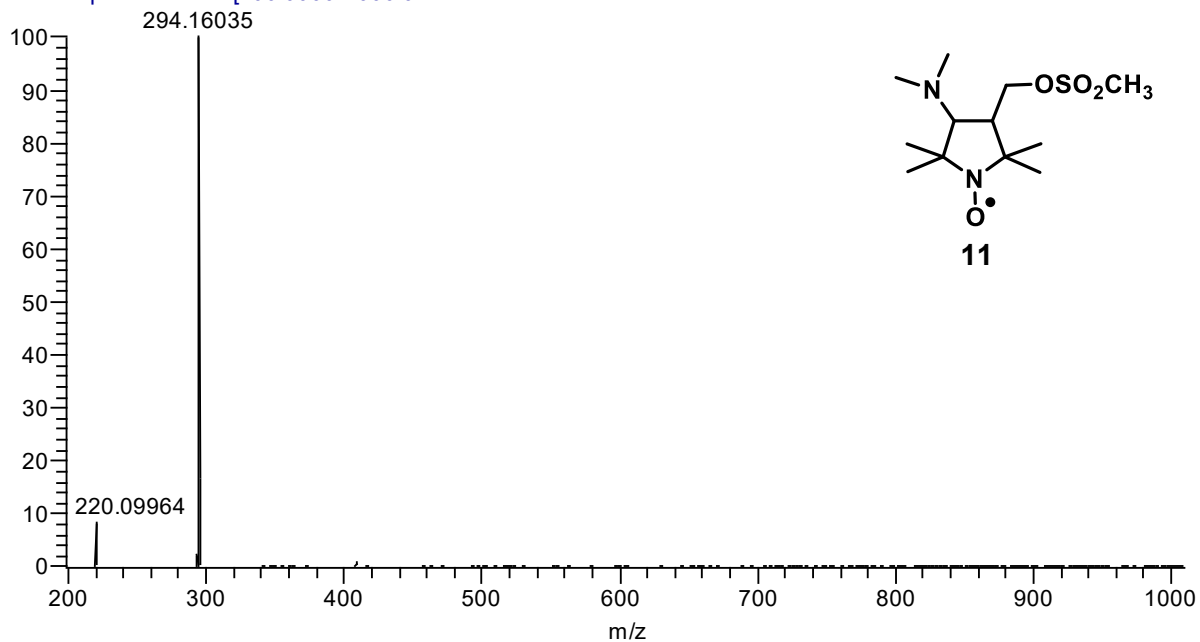

**Experimental and Theoretical Isotopic Distribution C<sub>12</sub>H<sub>25</sub>N<sub>2</sub>O<sub>4</sub>S [M+H]<sup>+</sup>**

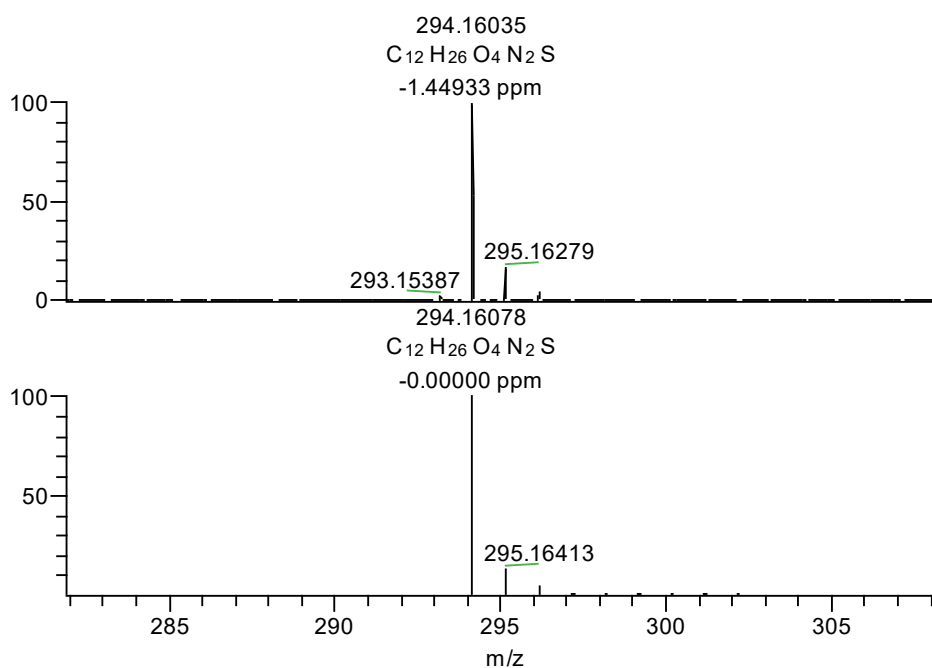

NL:  
7.54E8  
200086\_MAV-757#48-  
70 RT: 0.29-0.40 AV:  
23 T: FTMS + p ESI Full  
ms  
[200.0000-1000.0000]

NL:  
8.18E5  
C<sub>12</sub>H<sub>25</sub>N<sub>2</sub>O<sub>4</sub>S +H:  
C<sub>12</sub>H<sub>26</sub>N<sub>2</sub>O<sub>4</sub>S<sub>1</sub>  
pa Chrg 1

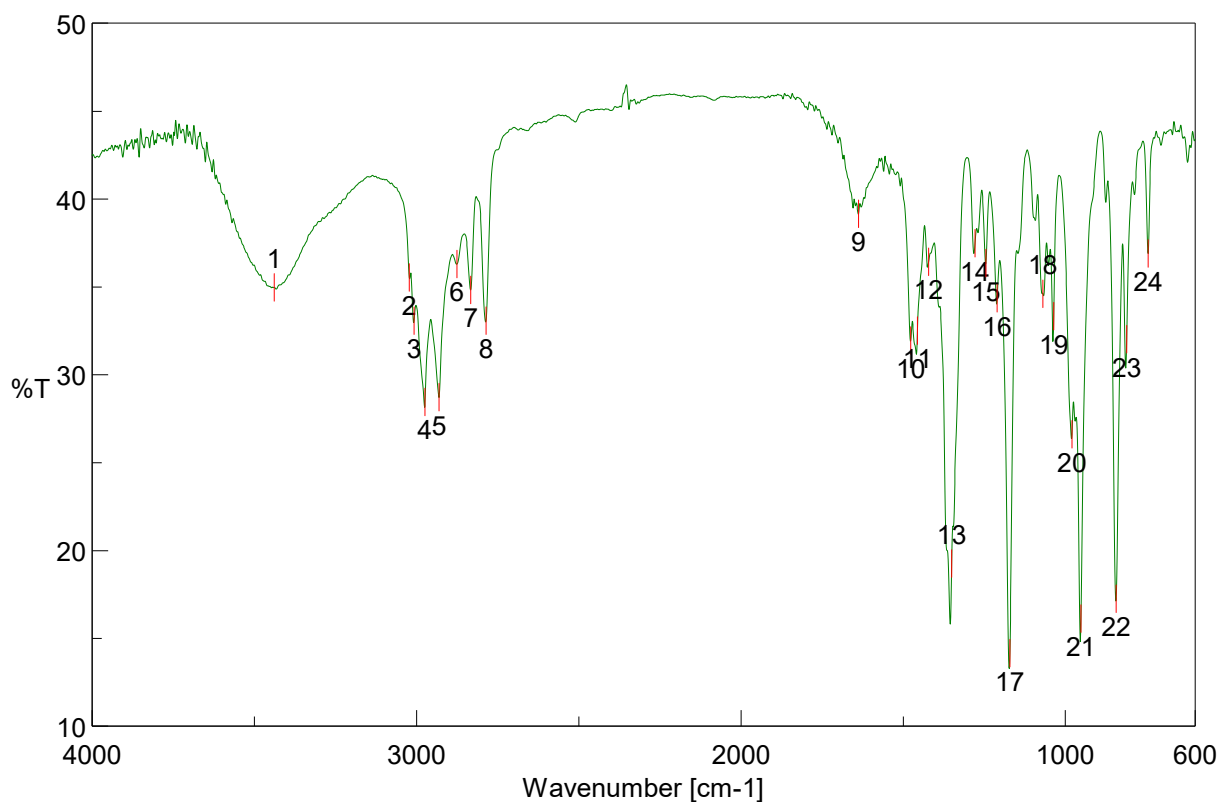

[Comments]

Sample name  
 Comment  
 User  
 Division  
 Company NCSU

[Detailed Information]

Creation date 10/23/2019 7:10 PM  
 Data array type Linear data array  
 Horizontal axis Wavenumber [cm-1]  
 Vertical axis %T  
 Start 0 cm-1  
 End 7800.65 cm-1  
 Data interval 0.964233 cm-1  
 Data points 8091

[Measurement Information]

Model Name FT/IR-4100typeA  
 Serial Number B096961016  
 Measurement Date 10/23/2019 7:09 PM  
 Light Source Standard  
 Detector TGS  
 Accumulation 8  
 Resolution 4 cm-1  
 Zero Filling On  
 Apodization Cosine  
 Gain Auto (4)  
 Aperture Auto (7.1 mm)  
 Scanning Speed Auto (2 mm/sec)  
 Filter Auto (30000 Hz)

[ Result of Peak Picking ]

| No. | Position | Intensity | No. | Position | Intensity |
|-----|----------|-----------|-----|----------|-----------|
| 1   | 3438.46  | 34.9667   | 2   | 3022.87  | 35.5319   |

[ Result of Peak Picking ]

| No. | Position | Intensity | No. | Position | Intensity |
|-----|----------|-----------|-----|----------|-----------|
| 3   | 3007.44  | 33.0638   | 4   | 2973.7   | 28.4482   |
| 5   | 2930.31  | 28.7203   | 6   | 2875.34  | 36.2855   |
| 7   | 2832.92  | 34.8097   | 8   | 2785.67  | 33.0599   |
| 9   | 1637.27  | 39.1536   | 10  | 1477.21  | 31.9328   |
| 11  | 1455.99  | 32.4972   | 12  | 1421.28  | 36.4136   |
| 13  | 1350.89  | 19.2438   | 14  | 1278.57  | 37.4737   |
| 15  | 1244.83  | 36.3434   | 16  | 1210.11  | 34.3344   |
| 17  | 1171.54  | 14.1508   | 18  | 1069.33  | 34.606    |
| 19  | 1035.59  | 33.3183   | 20  | 979.661  | 26.6071   |
| 21  | 951.698  | 16.1121   | 22  | 843.704  | 17.2465   |
| 23  | 810.92   | 32.0181   | 24  | 745.352  | 36.8897   |

High resolution mass spectrometry and infrared spectroscopy data for 3-Bromomethyl-4-dimethylamino-1-oxyl-2,2,5,5-tetramethylpyrrolidine **13**

**Full Scan Positive Ion Mode**

| Sample | M <sub>Theoretical</sub> | M <sub>Experimental</sub> | ΔM (ppm) | Elemental Composition                              |
|--------|--------------------------|---------------------------|----------|----------------------------------------------------|
|        | 278.09883                | 278.09836                 | -1.683   | C <sub>11</sub> H <sub>22</sub> BrN <sub>2</sub> O |
|        | [M+H] <sup>+</sup>       | [M+H] <sup>+</sup>        |          |                                                    |
|        | 280.09678                | 280.09573                 | -3.749   | C <sub>11</sub> H <sub>22</sub> BrN <sub>2</sub> O |
|        | [M+H] <sup>+</sup>       | [M+H] <sup>+</sup>        |          |                                                    |

210249\_MAV809 #57-84 RT: 0.32-0.46 AV: 28 NL: 1.97E8

T: FTMS + p ESI Full ms [100.0000-800.0000]

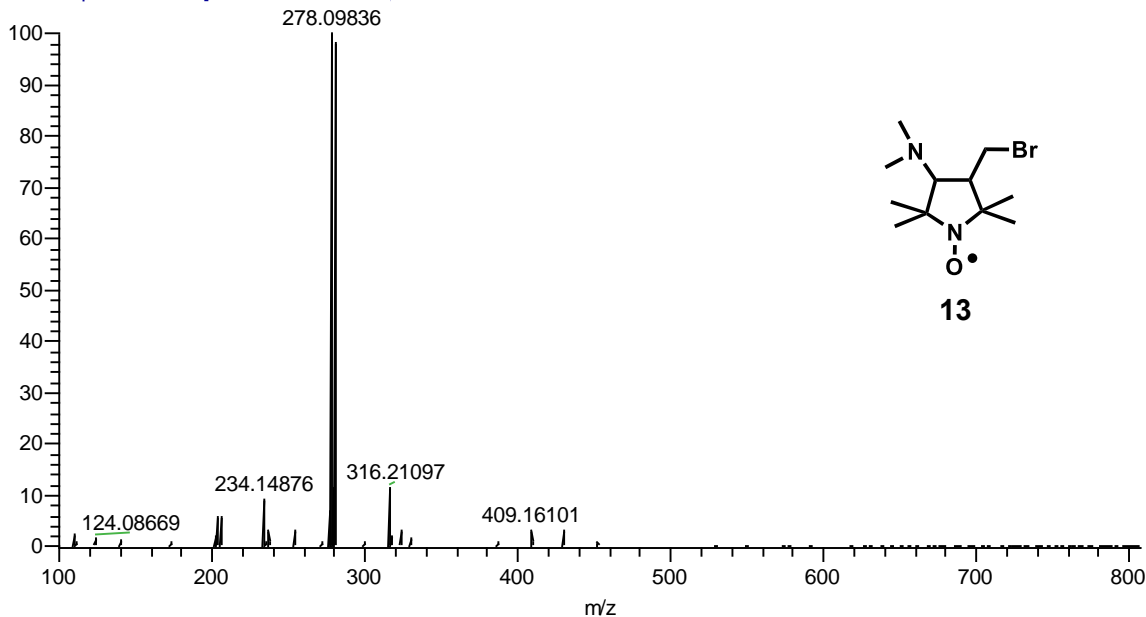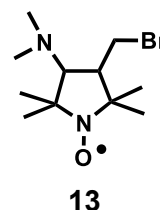

**Experimental and Theoretical Isotopic Distribution for C<sub>11</sub>H<sub>22</sub>BrN<sub>2</sub>O [M+H]<sup>+</sup>**

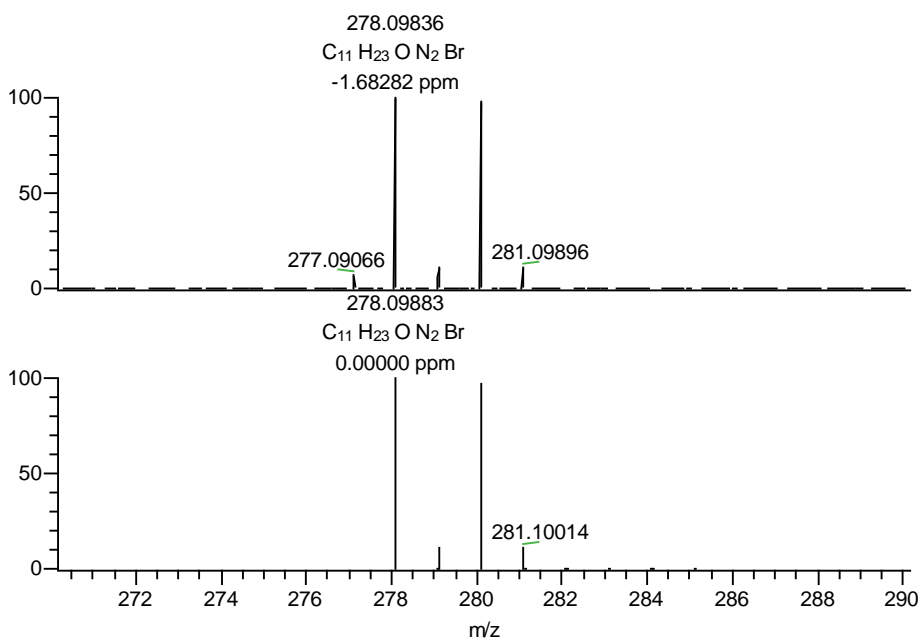

NL:  
1.97E8  
210249\_MAV809#57-  
84 RT: 0.32-0.46 AV:  
28 T: FTMS + p ESI Full  
ms  
[100.0000-800.0000]

NL:  
4.45E5  
C<sub>11</sub>H<sub>22</sub>BrN<sub>2</sub>O +H:  
C<sub>11</sub>H<sub>23</sub>Br<sub>1</sub>N<sub>2</sub>O<sub>1</sub>  
pa Chrg 1

**Scan 271 – 290 m/z**

210249\_MAV809 #58-84 RT: 0.32-0.46 AV: 27 NL: 2.03E8

T: FTMS + p ESI Full ms [100.0000-800.0000]

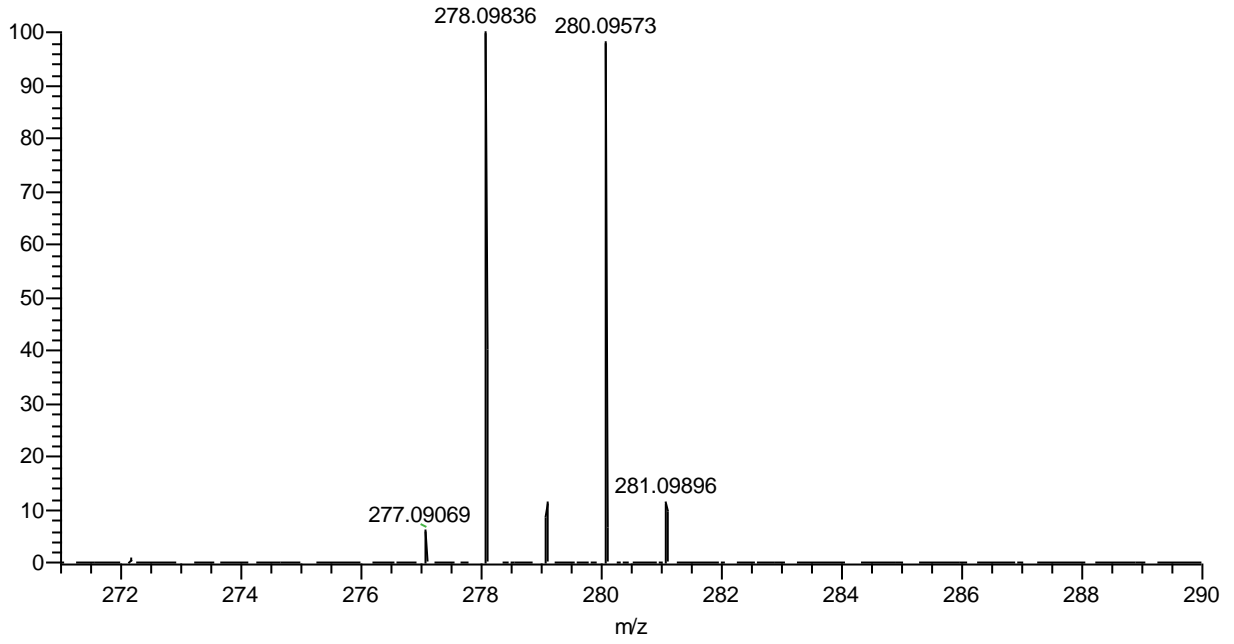



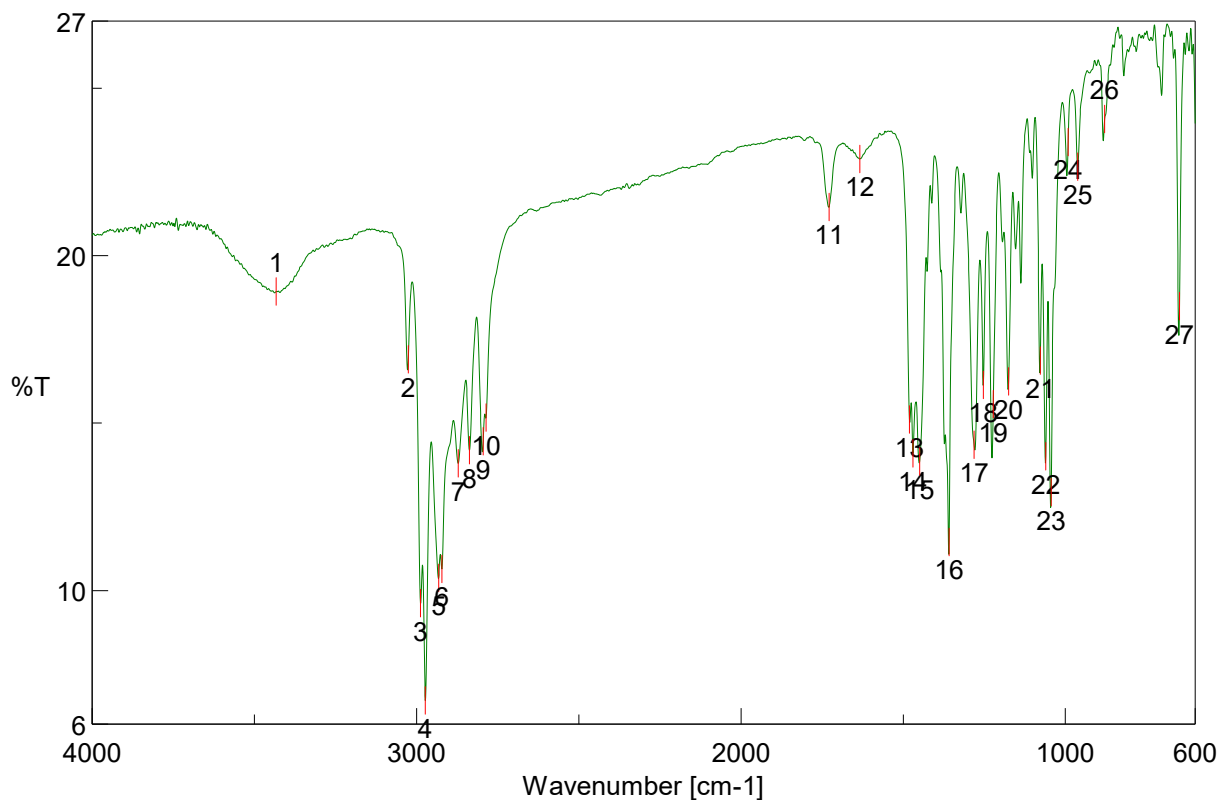

[Comments]

Sample name  
 Comment  
 User  
 Division  
 Company NCSU

[Detailed Information]

Creation date 10/21/2022 4:34 PM  
 Data array type Linear data array  
 Horizontal axis Wavenumber [cm-1]  
 Vertical axis %T  
 Start 0 cm-1  
 End 7800.65 cm-1  
 Data interval 0.964233 cm-1  
 Data points 8091

[Measurement Information]

Model Name FT/IR-4100typeA  
 Serial Number B096961016  
 Measurement Date 10/21/2022 4:33 PM  
 Light Source Standard  
 Detector TGS  
 Accumulation 8  
 Resolution 4 cm-1  
 Zero Filling On  
 Apodization Cosine  
 Gain Auto (8)  
 Aperture Auto (7.1 mm)  
 Scanning Speed Auto (2 mm/sec)  
 Filter Auto (30000 Hz)

[ Result of Peak Picking ]

| No. | Position | Intensity | No. | Position | Intensity |
|-----|----------|-----------|-----|----------|-----------|
| 1   | 3432.67  | 18.9189   | 2   | 3025.76  | 16.8985   |

[ Result of Peak Picking ]

| No. | Position | Intensity | No. | Position | Intensity |
|-----|----------|-----------|-----|----------|-----------|
| 3   | 2988.16  | 9.61133   | 4   | 2972.73  | 6.70367   |
| 5   | 2932.23  | 10.3682   | 6   | 2921.63  | 10.6326   |
| 7   | 2871.49  | 13.7897   | 8   | 2836.77  | 14.1802   |
| 9   | 2794.35  | 14.4475   | 10  | 2785.67  | 15.1598   |
| 11  | 1728.87  | 21.4482   | 12  | 1633.41  | 22.884    |
| 13  | 1481.06  | 15.0992   | 14  | 1470.46  | 14.0911   |
| 15  | 1449.24  | 13.8488   | 16  | 1358.6   | 11.4343   |
| 17  | 1281.47  | 14.3484   | 18  | 1252.54  | 16.1364   |
| 19  | 1222.65  | 15.5551   | 20  | 1175.4   | 16.2356   |
| 21  | 1077.05  | 16.855    | 22  | 1060.66  | 13.9995   |
| 23  | 1044.26  | 12.9306   | 24  | 991.232  | 23.3845   |
| 25  | 962.305  | 22.6528   | 26  | 879.381  | 24.0753   |
| 27  | 647.965  | 18.4822   |     |          |           |

High resolution mass spectrometry and infrared spectroscopy data for 3-Dimethylamino-4-iodomethyl-1-oxyl-2,2,5,5-tetramethylpyrrolidine **14**

**Full Scan Positive Ion Mode**

| Sample | M <sub>Theoretical</sub> | M <sub>Experimental</sub> | ΔM (ppm) | Elemental Composition                             |
|--------|--------------------------|---------------------------|----------|---------------------------------------------------|
|        | 326.08496                | 326.08464                 | -0.967   | C <sub>11</sub> H <sub>22</sub> IN <sub>2</sub> O |
|        | [M+H] <sup>+</sup>       | [M+H] <sup>+</sup>        |          |                                                   |

210781\_MAV821 #53-73 RT: 0.32-0.43 AV: 21 NI : 3.20F8

T: FTMS + p ESI Full ms [200.0000-1000.]

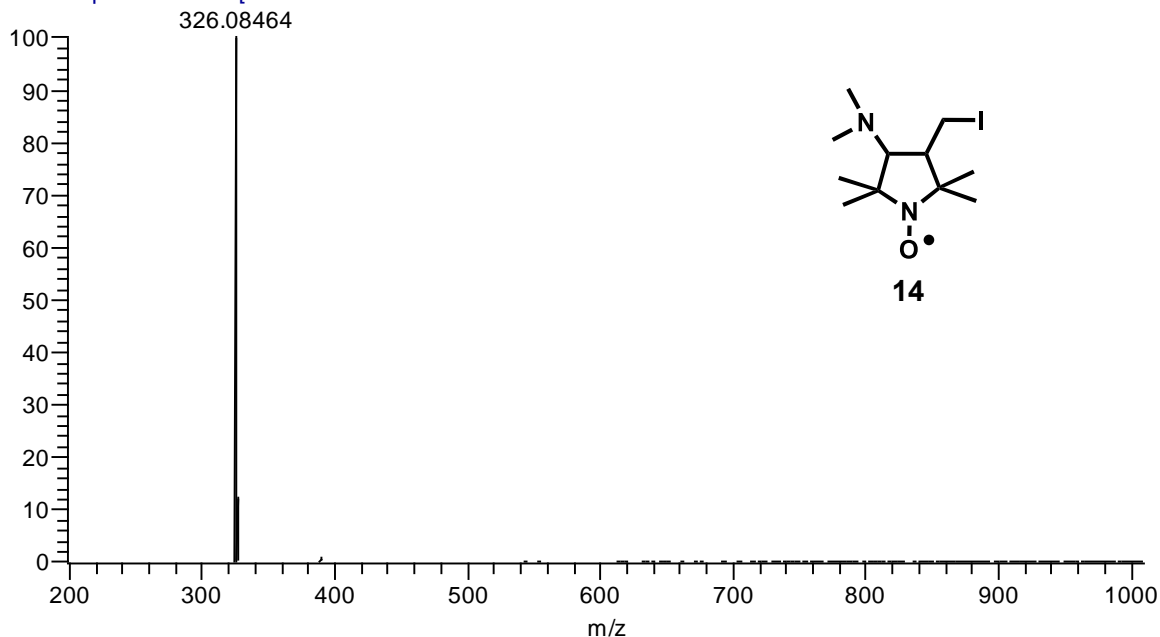

**Experimental and Theoretical Isotopic Distribution for C<sub>11</sub>H<sub>22</sub>IN<sub>2</sub>O [M+H]<sup>+</sup>**

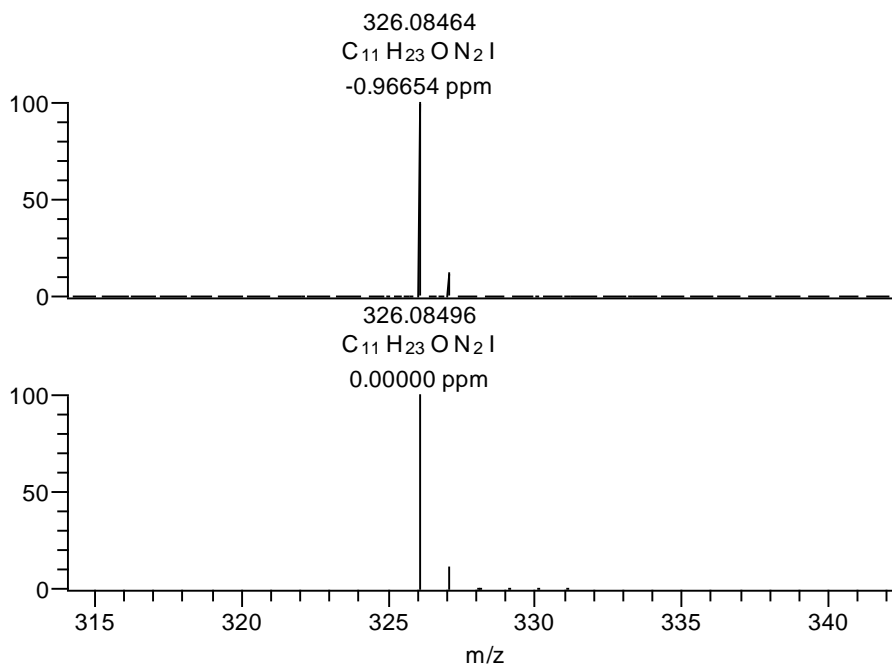

NL:  
3.20E8  
210781\_MAV821#53-  
73 RT: 0.32-0.43 AV:  
21 T: FTMS + p ESI  
Full ms  
[200.0000-1000.0000]

NL:  
8.77E5  
C<sub>11</sub>H<sub>22</sub>IN<sub>2</sub>O +H:  
C<sub>11</sub>H<sub>23</sub>I<sub>1</sub>N<sub>2</sub>O<sub>1</sub>  
pa Chrg 1

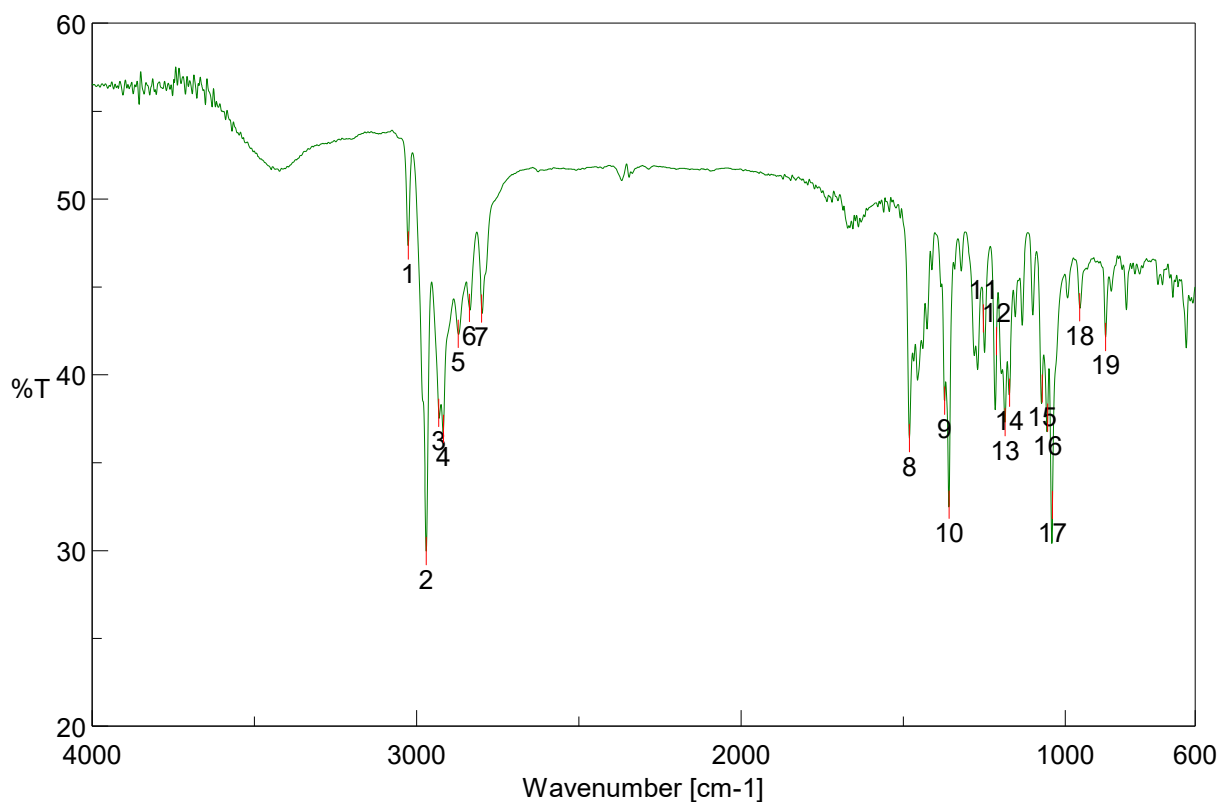

[Comments]

Sample name  
 Comment  
 User  
 Division  
 Company NCSU

[Detailed Information]

Creation date 10/5/2022 7:43 PM  
 Data array type Linear data array  
 Horizontal axis Wavenumber [cm-1]  
 Vertical axis %T  
 Start 0 cm-1  
 End 7800.65 cm-1  
 Data interval 0.964233 cm-1  
 Data points 8091

[Measurement Information]

Model Name FT/IR-4100typeA  
 Serial Number B096961016  
 Measurement Date 10/5/2022 7:43 PM  
 Light Source Standard  
 Detector TGS  
 Accumulation 8  
 Resolution 4 cm-1  
 Zero Filling On  
 Apodization Cosine  
 Gain Auto (4)  
 Aperture Auto (7.1 mm)  
 Scanning Speed Auto (2 mm/sec)  
 Filter Auto (30000 Hz)

[ Result of Peak Picking ]

| No. | Position | Intensity | No. | Position | Intensity |
|-----|----------|-----------|-----|----------|-----------|
| 1   | 3025.76  | 47.3521   | 2   | 2969.84  | 29.9548   |

[ Result of Peak Picking ]

| No. | Position | Intensity | No. | Position | Intensity |
|-----|----------|-----------|-----|----------|-----------|
| 3   | 2932.23  | 37.83     | 4   | 2916.81  | 36.9111   |
| 5   | 2871.49  | 42.3159   | 6   | 2836.77  | 43.7876   |
| 7   | 2799.17  | 43.7578   | 8   | 1481.06  | 36.3943   |
| 9   | 1372.1   | 38.5158   | 10  | 1358.6   | 32.6062   |
| 11  | 1252.54  | 43.1908   | 12  | 1212.04  | 41.9042   |
| 13  | 1186.01  | 37.2966   | 14  | 1172.51  | 38.9789   |
| 15  | 1071.26  | 39.2032   | 16  | 1054.87  | 37.5456   |
| 17  | 1039.44  | 32.5841   | 18  | 956.52   | 43.8363   |
| 19  | 876.488  | 42.14     |     |          |           |

High resolution mass spectrometry and infrared spectroscopy data for 3-Azidomethyl-4-dimethylamino-1-oxyl-2,2,5,5-tetramethylpyrrolidine **15**

**Full Scan Positive Ion Mode**

| Sample | M <sub>Theoretical</sub> | M <sub>Experimental</sub> | ΔM (ppm) | Elemental Composition                            |
|--------|--------------------------|---------------------------|----------|--------------------------------------------------|
|        | 241.18971                | 241.18917                 | -2.240   | C <sub>11</sub> H <sub>22</sub> N <sub>5</sub> O |
|        | [M+H] <sup>+</sup>       | [M+H] <sup>+</sup>        |          |                                                  |

210442\_MAV-808 #82-94 RT: 0.48-0.55 AV: 13 NL: 3.15E7

T: FTMS + p ESI Full ms [200.0000-1500.000]

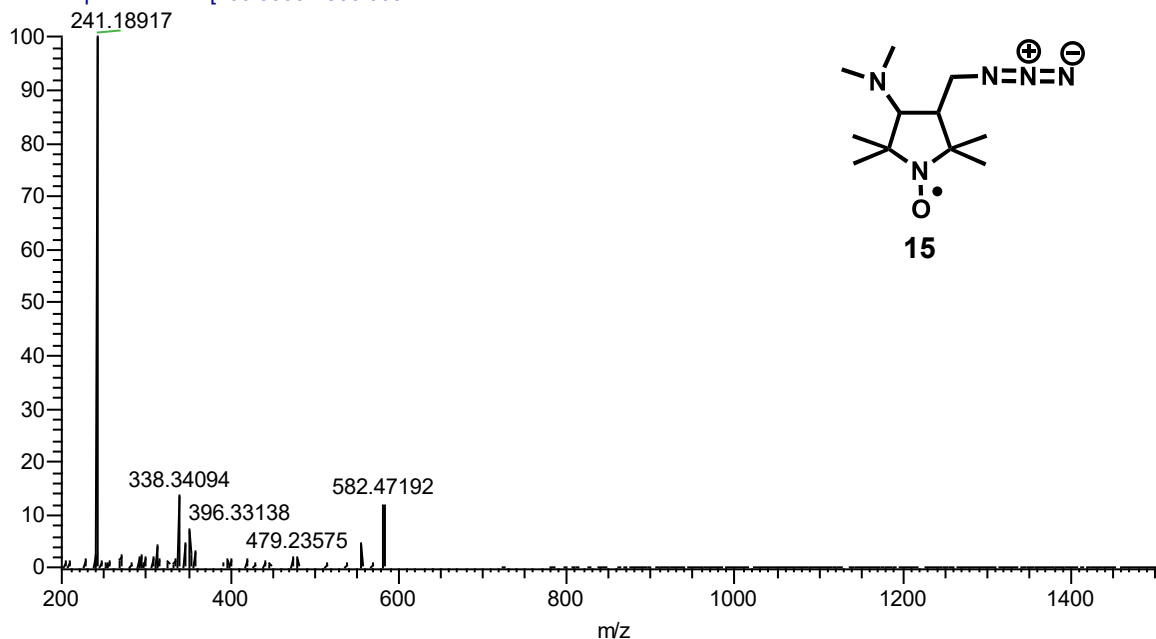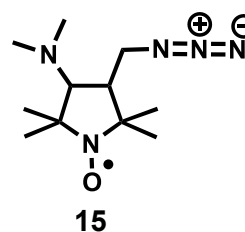

**Experimental and Theoretical Isotopic Distribution for C<sub>11</sub>H<sub>22</sub>N<sub>5</sub>O [M+H]<sup>+</sup>**

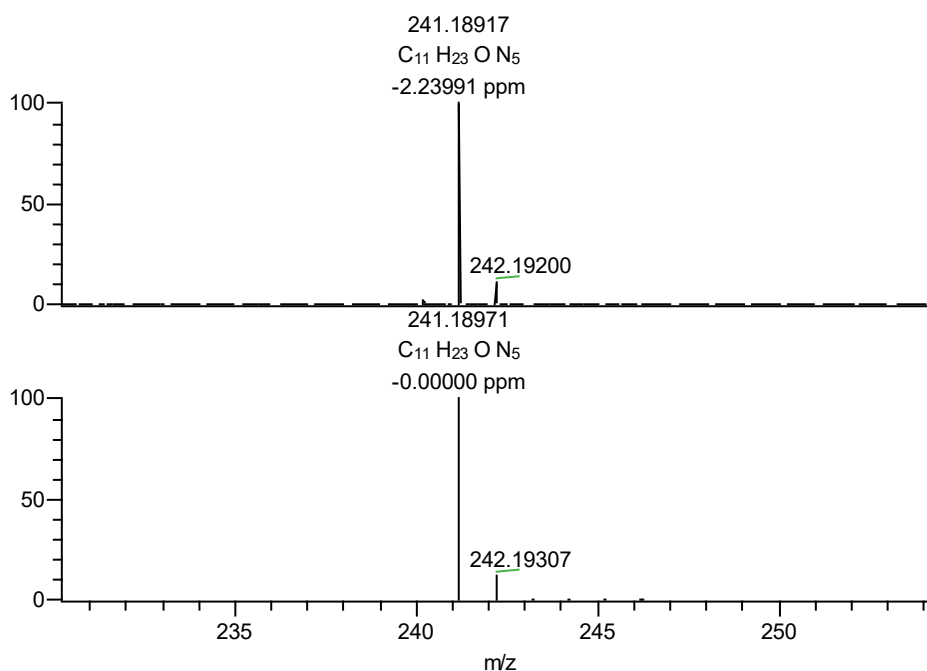

NL:  
3.15E7  
210442\_MAV-808#82-94 RT: 0.48-0.55 AV: 13 T: FTMS + p ESI Full ms [200.0000-1500.000]

NL:  
8.68E5  
C<sub>11</sub>H<sub>22</sub>N<sub>5</sub>O +H:  
C<sub>11</sub>H<sub>23</sub>N<sub>5</sub>O<sub>1</sub>  
pa Chrg 1

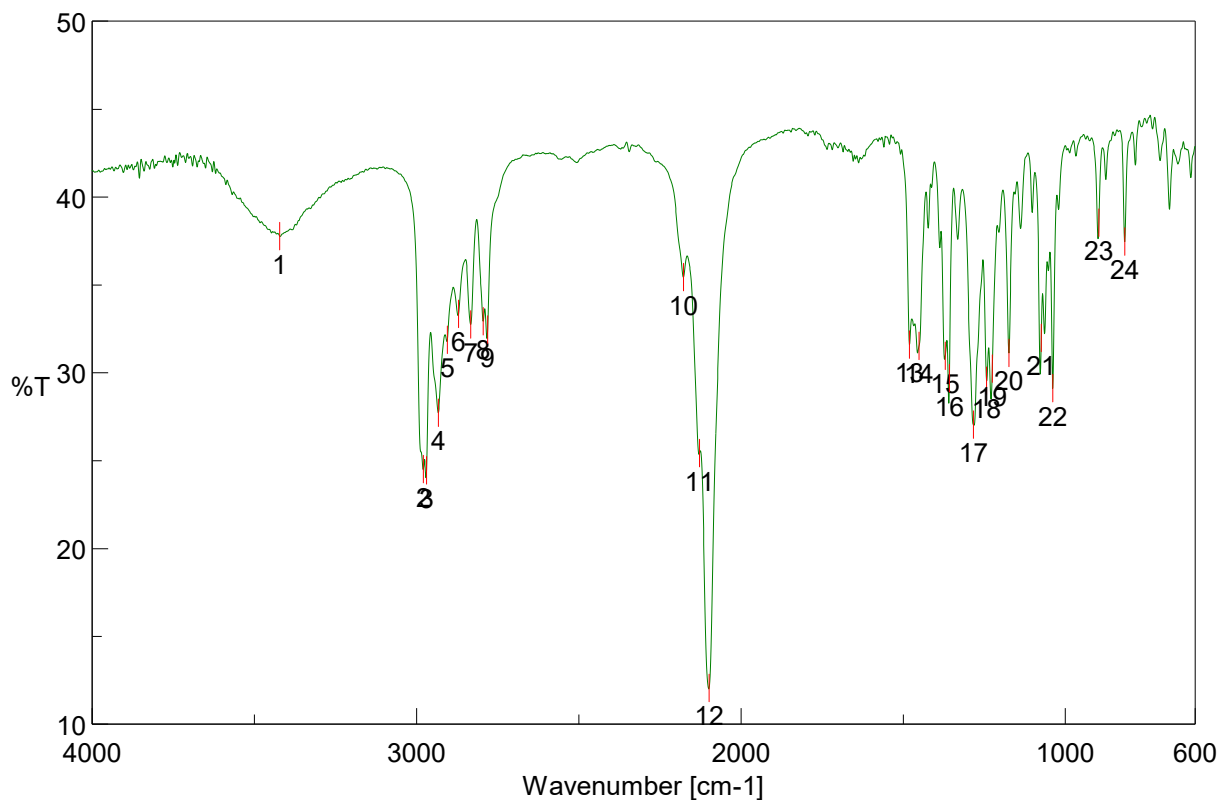

[Comments]

Sample name  
 Comment  
 User  
 Division  
 Company           NCSU

[Detailed Information]

Creation date       12/4/2020 1:12 PM  
 Data array type    Linear data array  
 Horizontal axis    Wavenumber [cm-1]  
 Vertical axis       %T  
 Start               0 cm-1  
 End                 7800.65 cm-1  
 Data interval      0.964233 cm-1  
 Data points        8091

[Measurement Information]

Model Name         FT/IR-4100typeA  
 Serial Number     B096961016  
 Measurement Date  12/4/2020 1:12 PM  
 Light Source       Standard  
 Detector           TGS  
 Accumulation      8  
 Resolution         4 cm-1  
 Zero Filling       On  
 Apodization       Cosine  
 Gain               Auto (4)  
 Aperture           Auto (7.1 mm)  
 Scanning Speed    Auto (2 mm/sec)  
 Filter              Auto (30000 Hz)

[ Result of Peak Picking ]

| No. | Position | Intensity | No. | Position | Intensity |
|-----|----------|-----------|-----|----------|-----------|
| 1   | 3422.06  | 37.7615   | 2   | 2979.48  | 24.5035   |

[ Result of Peak Picking ]

| No. | Position | Intensity | No. | Position | Intensity |
|-----|----------|-----------|-----|----------|-----------|
| 3   | 2968.87  | 24.4359   | 4   | 2933.2   | 27.7193   |
| 5   | 2905.24  | 31.8617   | 6   | 2870.52  | 33.35     |
| 7   | 2832.92  | 32.7414   | 8   | 2794.35  | 32.9133   |
| 9   | 2780.85  | 32.4474   | 10  | 2177.24  | 35.4262   |
| 11  | 2128.06  | 25.4213   | 12  | 2098.17  | 12.052    |
| 13  | 1481.06  | 31.5972   | 14  | 1451.17  | 31.5289   |
| 15  | 1370.18  | 30.9598   | 16  | 1357.64  | 29.6805   |
| 17  | 1283.39  | 27.0419   | 18  | 1242.9   | 29.5438   |
| 19  | 1225.54  | 30.2343   | 20  | 1174.44  | 31.1191   |
| 21  | 1074.16  | 31.9838   | 22  | 1038.48  | 29.1125   |
| 23  | 896.737  | 38.5219   | 24  | 816.706  | 37.4598   |



**Full Scan Positive Ion Mode:**

| Sample | M <sub>Theoretical</sub>        | M <sub>Experimental</sub>       | ΔM (ppm) | Elemental Composition                                         |
|--------|---------------------------------|---------------------------------|----------|---------------------------------------------------------------|
|        | 517.31597<br>[M+H] <sup>+</sup> | 517.31558<br>[M+H] <sup>+</sup> | -0.76307 | C <sub>29</sub> H <sub>39</sub> N <sub>7</sub> O <sub>2</sub> |

MAV-863 #169-681 RT: 0.77-3.08 AV: 513 NL: 1.33E9

T: FTMS + p ESI Full ms [100.0000-1000.0000]

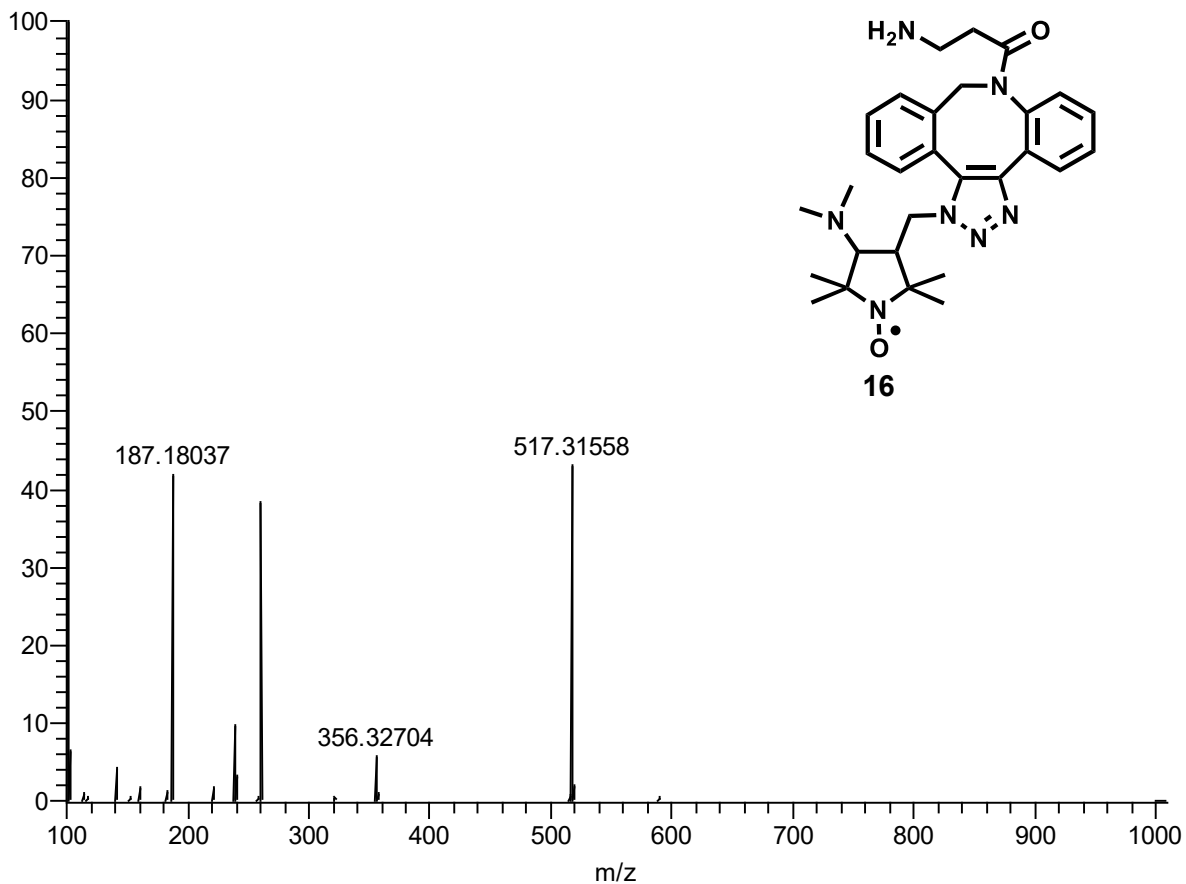

**Experimental and Theoretical Isotopic Distribution [M+H]<sup>+</sup>**

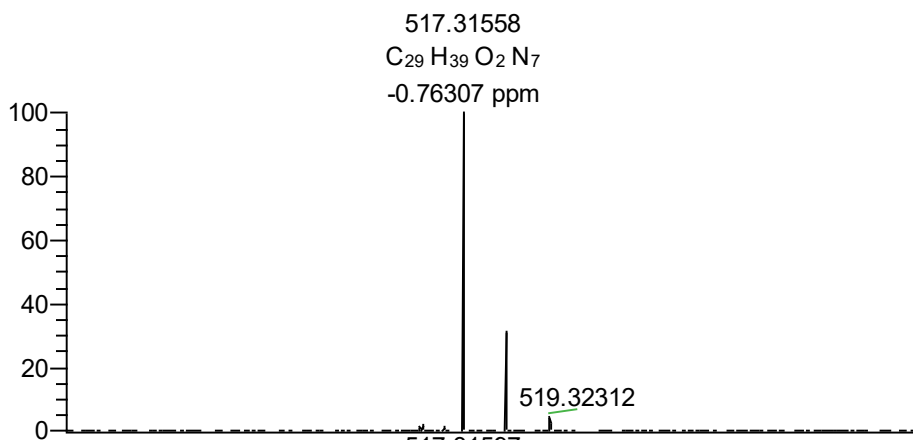

NL:  
5.74E8  
MAV-863#169-681  
RT: 0.77-3.08 AV:  
513 T: FTMS + p ESI  
Full ms  
[100.0000-1000.0000]

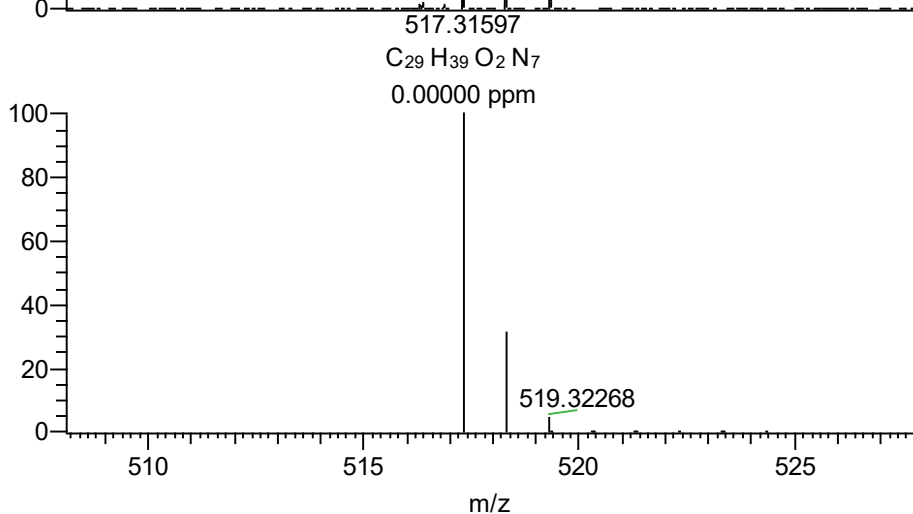

NL:  
7.07E5  
C<sub>29</sub> H<sub>38</sub> N<sub>7</sub> O<sub>2</sub> +H:  
C<sub>29</sub> H<sub>39</sub> N<sub>7</sub> O<sub>2</sub>  
pa Chrg 1

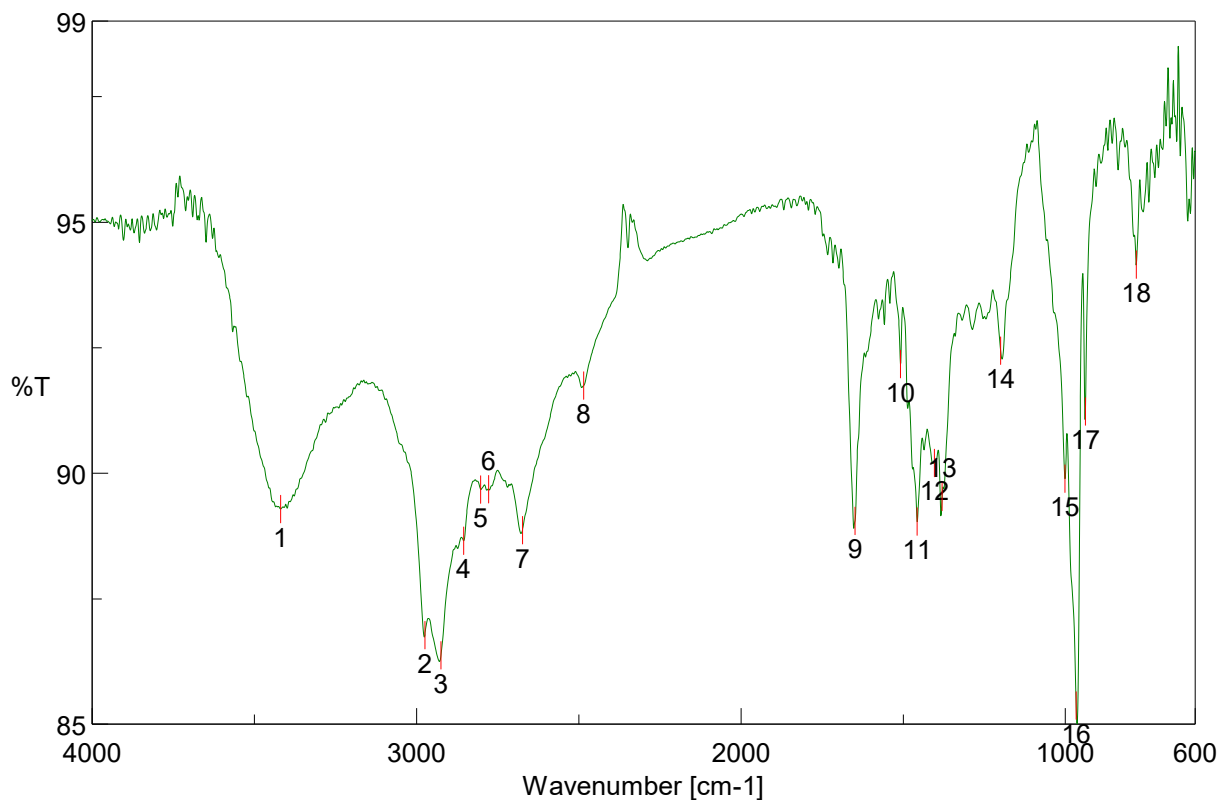

[Comments]

Sample name  
 Comment  
 User  
 Division  
 Company NCSU

[Detailed Information]

Creation date 12/5/2022 5:44 PM  
 Data array type Linear data array  
 Horizontal axis Wavenumber [cm-1]  
 Vertical axis %T  
 Start 0 cm-1  
 End 7800.65 cm-1  
 Data interval 0.964233 cm-1  
 Data points 8091

[Measurement Information]

Model Name FT/IR-4100typeA  
 Serial Number B096961016  
 Measurement Date 12/5/2022 5:44 PM  
 Light Source Standard  
 Detector TGS  
 Accumulation 8  
 Resolution 4 cm-1  
 Zero Filling On  
 Apodization Cosine  
 Gain Auto (2)  
 Aperture Auto (7.1 mm)  
 Scanning Speed Auto (2 mm/sec)  
 Filter Auto (30000 Hz)

[ Result of Peak Picking ]

| No. | Position | Intensity | No. | Position | Intensity |
|-----|----------|-----------|-----|----------|-----------|
| 1   | 3419.17  | 89.2848   | 2   | 2974.66  | 86.7732   |

[ Result of Peak Picking ]

| No. | Position | Intensity | No. | Position | Intensity |
|-----|----------|-----------|-----|----------|-----------|
| 3   | 2924.52  | 86.3688   | 4   | 2855.1   | 88.6506   |
| 5   | 2802.06  | 89.6719   | 6   | 2777.96  | 89.6747   |
| 7   | 2673.82  | 88.8634   | 8   | 2484.83  | 91.7437   |
| 9   | 1648.84  | 89.0495   | 10  | 1508.06  | 92.1679   |
| 11  | 1456.96  | 89.0346   | 12  | 1403.92  | 90.2019   |
| 13  | 1379.82  | 89.5218   | 14  | 1199.51  | 92.4348   |
| 15  | 1001.84  | 89.888    | 16  | 967.126  | 85.3681   |
| 17  | 938.199  | 91.2249   | 18  | 781.029  | 94.1504   |

High resolution mass spectrometry and infrared spectroscopy data for 3-Dimethylamino-1-oxyl-2,2,5,5-tetramethyl-4-[2-(tetrahydropyran-2-yloxy)-ethoxymethyl]-pyrrolidine **17**

**Full Scan Positive Ion Mode**

| Sample | M <sub>Theoretical</sub> | M <sub>Experimental</sub> | ΔM (ppm) | Elemental Composition                                         |
|--------|--------------------------|---------------------------|----------|---------------------------------------------------------------|
|        | 344.26696                | 344.26750                 | 1.571    | C <sub>18</sub> H <sub>35</sub> N <sub>2</sub> O <sub>4</sub> |
|        | [M+H] <sup>+</sup>       | [M+H] <sup>+</sup>        |          |                                                               |

201567\_MAV798 #62-81 RT: 0.36-0.46 AV: 20 NL: 2.94E8

T: FTMS + p ESI Full ms [200.0000-1000.0000]

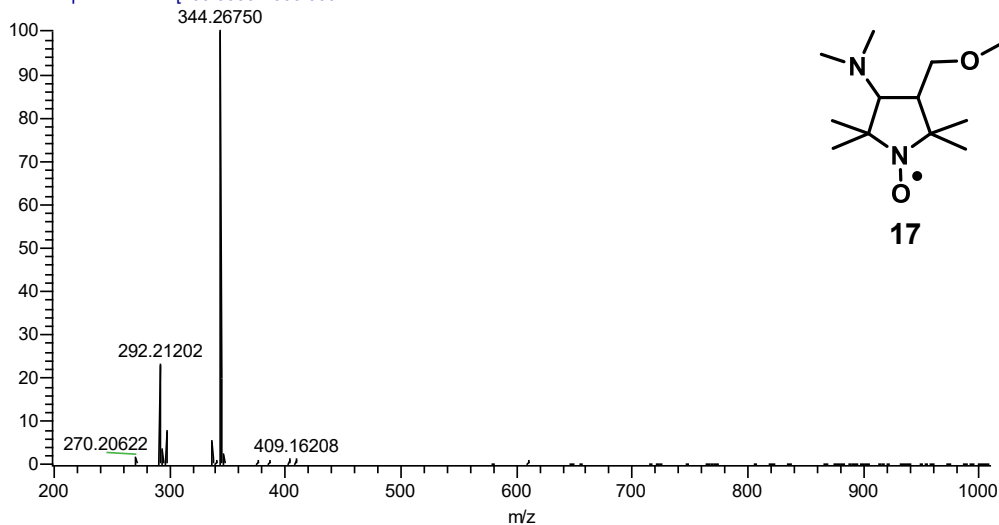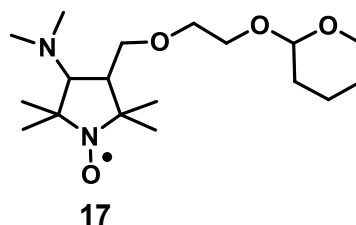

**Experimental and Theoretical Isotopic Distribution for C<sub>18</sub>H<sub>35</sub>N<sub>2</sub>O<sub>4</sub> [M+H]<sup>+</sup>**

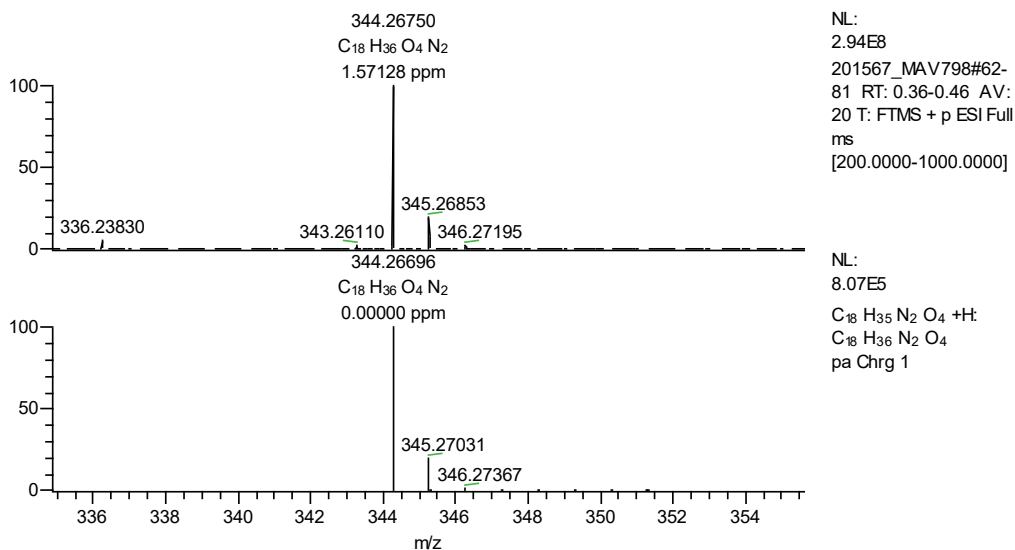

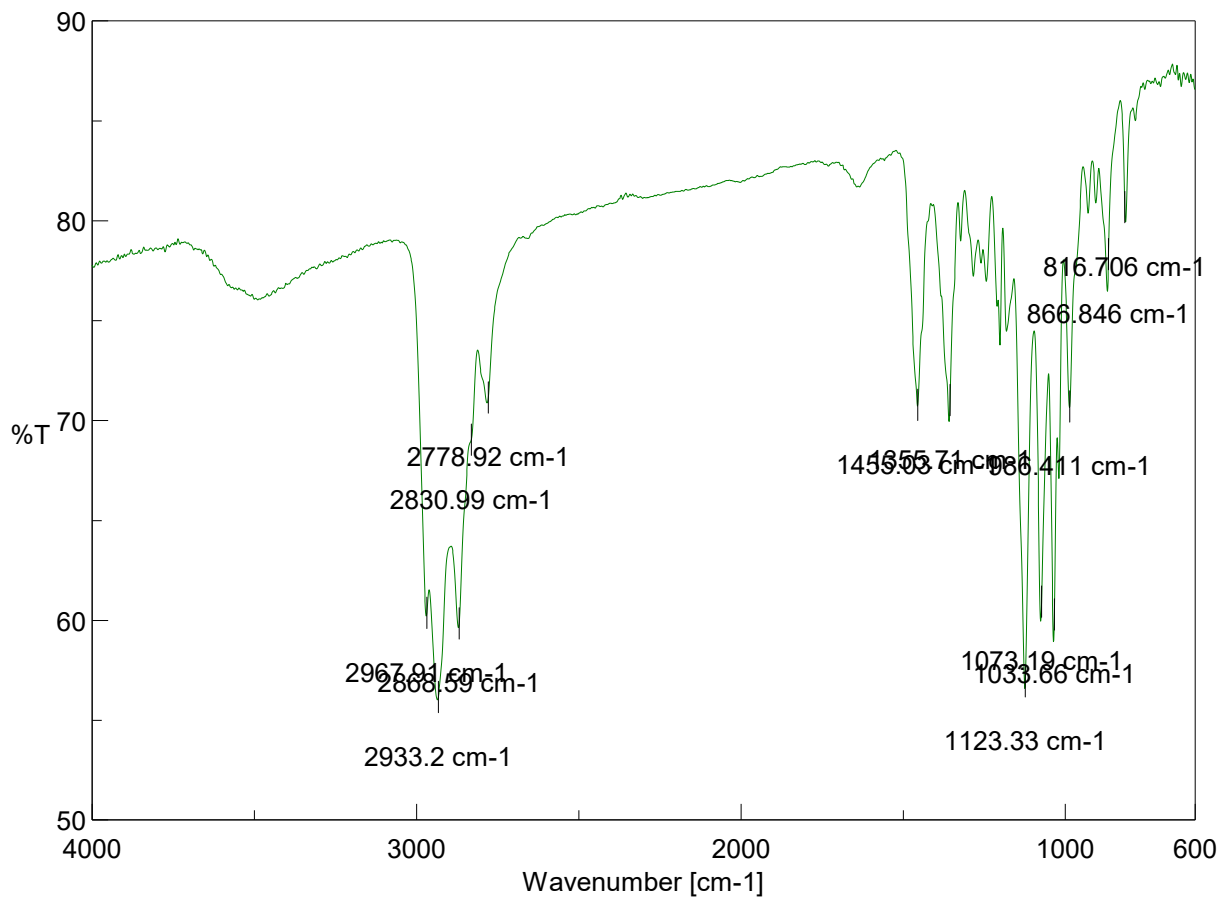

[Comments]

Sample name  
 Comment  
 User  
 Division  
 Company

NCSU

MAV\_798\_neat\_2.jws

[Detailed Information]

Creation date 10/22/2020 5:38 PM  
 Data array type Linear data array  
 Horizontal axis Wavenumber [cm-1]  
 Vertical axis %T  
 Start 0 cm-1  
 End 7800.65 cm-1  
 Data interval 0.964233 cm-1  
 Data points 8091

[Measurement Information]

Model Name FT/IR-4100typeA  
 Serial Number B096961016

Measurement Date 10/22/2020 5:34 PM

Light Source Standard  
 Detector TGS  
 Accumulation 8  
 Resolution 4 cm-1  
 Zero Filling On  
 Apodization Cosine  
 Gain Auto (2)  
 Aperture Auto (7.1 mm)  
 Scanning Speed Auto (2 mm/sec)  
 Filter Auto (30000 Hz)

High resolution mass spectrometry and infrared spectroscopy data for 3-Dimethylamino-4-(2-hydroxy-ethoxymethyl)-1-oxyl-2,2,5,5-tetramethylpyrrolidine **18**

**Full Scan Positive Ion Mode**

| Sample | M <sub>Theoretical</sub>        | M <sub>Experimental</sub>       | ΔM (ppm) | Elemental Composition                                         |
|--------|---------------------------------|---------------------------------|----------|---------------------------------------------------------------|
|        | 260.20944<br>[M+H] <sup>+</sup> | 260.20984<br>[M+H] <sup>+</sup> | 1.527    | C <sub>13</sub> H <sub>27</sub> N <sub>2</sub> O <sub>3</sub> |

201565\_MAV797 #50-79 RT: 0.28-0.44 AV: 30 NL: 7.95E8  
T: FTMS + p ESI Full ms [200.0000-1000.0000]

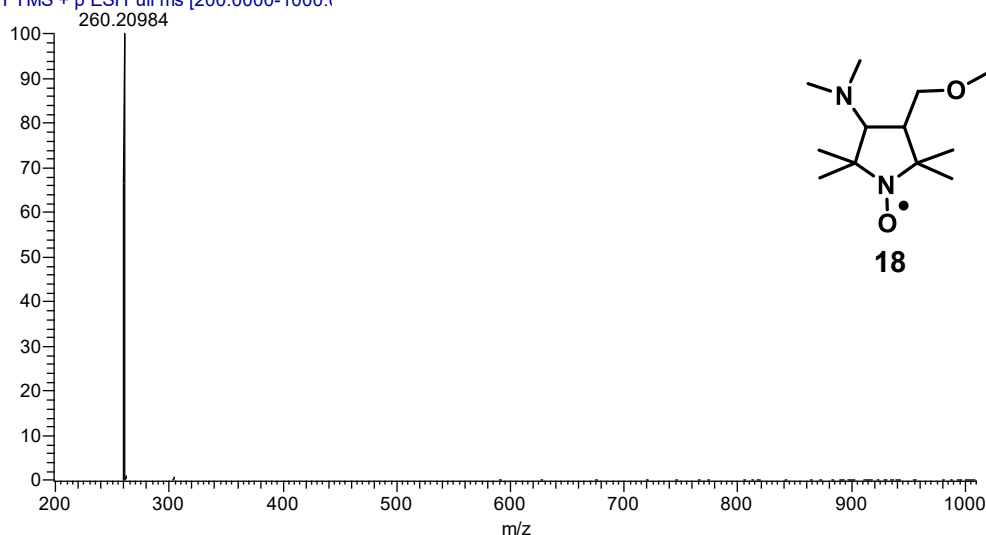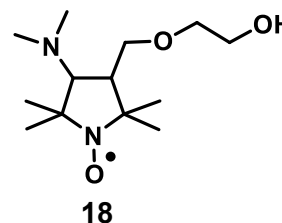

**Experimental and Theoretical Isotopic Distribution for C<sub>13</sub>H<sub>27</sub>N<sub>2</sub>O<sub>3</sub> [M+H]<sup>+</sup>**

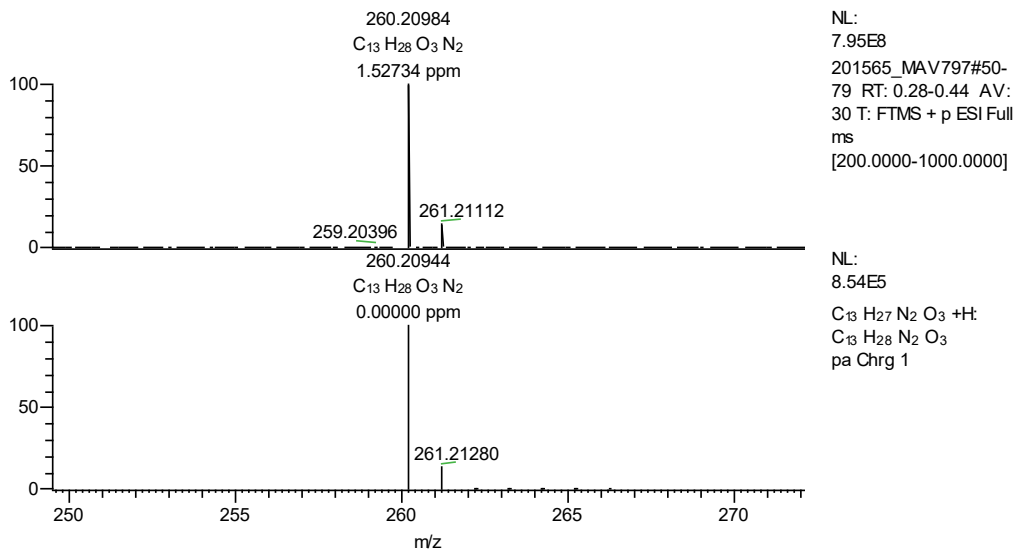

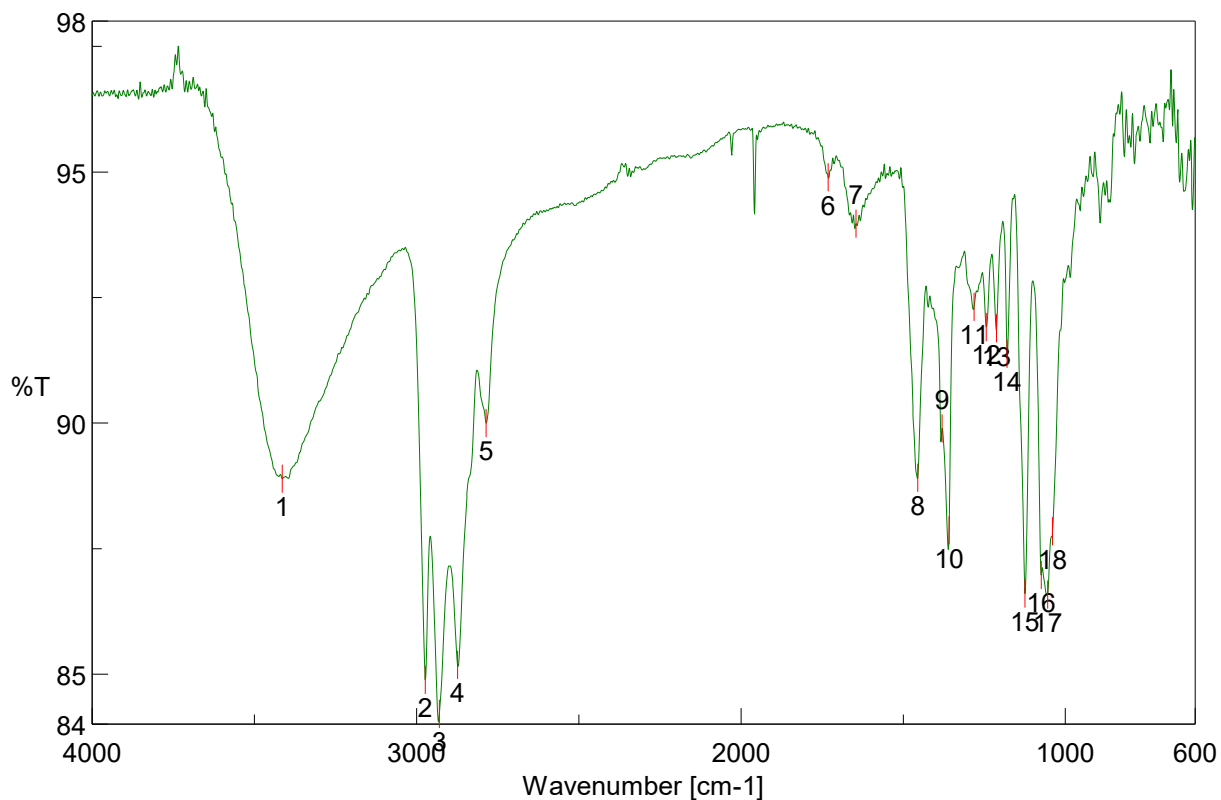

[Comments]

Sample name  
 Comment  
 User  
 Division  
 Company NCSU

[Detailed Information]

Creation date 10/7/2022 5:11 PM  
 Data array type Linear data array  
 Horizontal axis Wavenumber [cm-1]  
 Vertical axis %T  
 Start 0 cm-1  
 End 7800.65 cm-1  
 Data interval 0.964233 cm-1  
 Data points 8091

[Measurement Information]

Model Name FT/IR-4100typeA  
 Serial Number B096961016  
 Measurement Date 10/7/2022 5:10 PM  
 Light Source Standard  
 Detector TGS  
 Accumulation 8  
 Resolution 4 cm-1  
 Zero Filling On  
 Apodization Cosine  
 Gain Auto (2)  
 Aperture Auto (7.1 mm)  
 Scanning Speed Auto (2 mm/sec)  
 Filter Auto (30000 Hz)

[ Result of Peak Picking ]

| No. | Position | Intensity | No. | Position | Intensity |
|-----|----------|-----------|-----|----------|-----------|
| 1   | 3414.35  | 88.886    | 2   | 2972.73  | 84.878    |



[ Result of Peak Picking ]

| No. | Position | Intensity | No. | Position | Intensity |
|-----|----------|-----------|-----|----------|-----------|
| 3   | 2929.34  | 84.2027   | 4   | 2873.42  | 85.177    |
| 5   | 2785.67  | 89.996    | 6   | 1731.76  | 94.8912   |
| 7   | 1645.95  | 93.9662   | 8   | 1455.03  | 88.9046   |
| 9   | 1379.82  | 89.8879   | 10  | 1358.6   | 87.8618   |
| 11  | 1281.47  | 92.3066   | 12  | 1243.86  | 91.9049   |
| 13  | 1212.04  | 91.8808   | 14  | 1180.22  | 91.3704   |
| 15  | 1124.3   | 86.6013   | 16  | 1074.16  | 86.9685   |
| 17  | 1054.87  | 86.5826   | 18  | 1039.44  | 87.8455   |

High resolution mass spectrometry and infrared spectroscopy data for 2-((4-(dimethylamino)-1-oxyl-2,2,5,5-tetramethylpyrrolidin-3-yl)methoxy)ethyl methanesulfonate **19**

### Full Scan Positive Ion Mode

| Sample | M <sub>Theoretical</sub> | M <sub>Experimental</sub> | ΔM (ppm) | Elemental Composition                                           |
|--------|--------------------------|---------------------------|----------|-----------------------------------------------------------------|
|        | 338.18699                | 338.18734                 | 1.027    | C <sub>14</sub> H <sub>29</sub> N <sub>2</sub> O <sub>5</sub> S |
|        | [M+H] <sup>+</sup>       | [M+H] <sup>+</sup>        |          |                                                                 |

201997\_MAV-800 #41-78 RT: 0.25-0.44 AV: 38 NL: 1.40E9  
T: FTMS + p ESI Full ms [100.0000-800.0000]

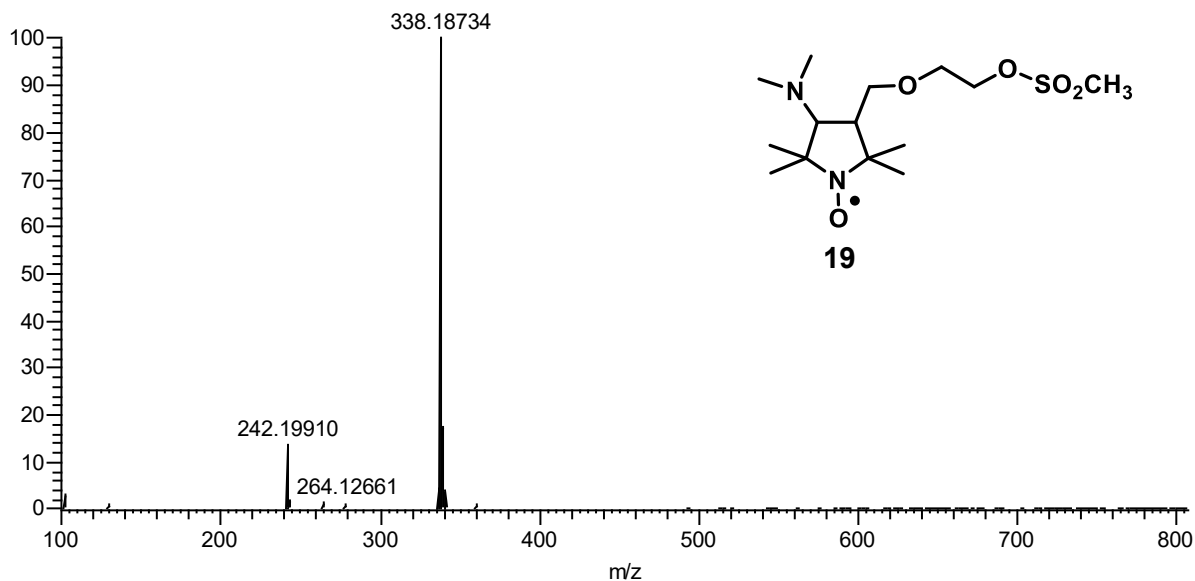

### Experimental and Theoretical Isotopic Distribution for C<sub>14</sub>H<sub>29</sub>N<sub>2</sub>O<sub>5</sub>S [M+H]<sup>+</sup>

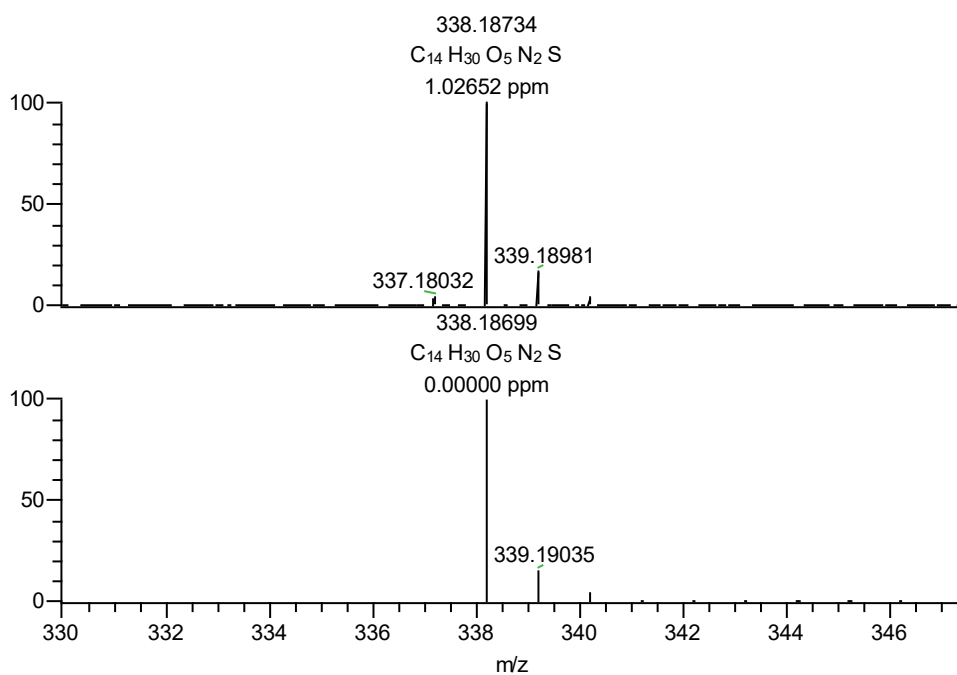

NL:  
1.40E9  
201997\_MAV-800#41-  
78 RT: 0.25-0.44 AV:  
38 T: FTMS + p ESI Full  
ms  
[100.0000-800.0000]

NL:  
7.98E5  
C<sub>14</sub> H<sub>29</sub> N<sub>2</sub> O<sub>5</sub> S +H:  
C<sub>14</sub> H<sub>30</sub> N<sub>2</sub> O<sub>5</sub> S<sub>1</sub>  
pa Chrg 1

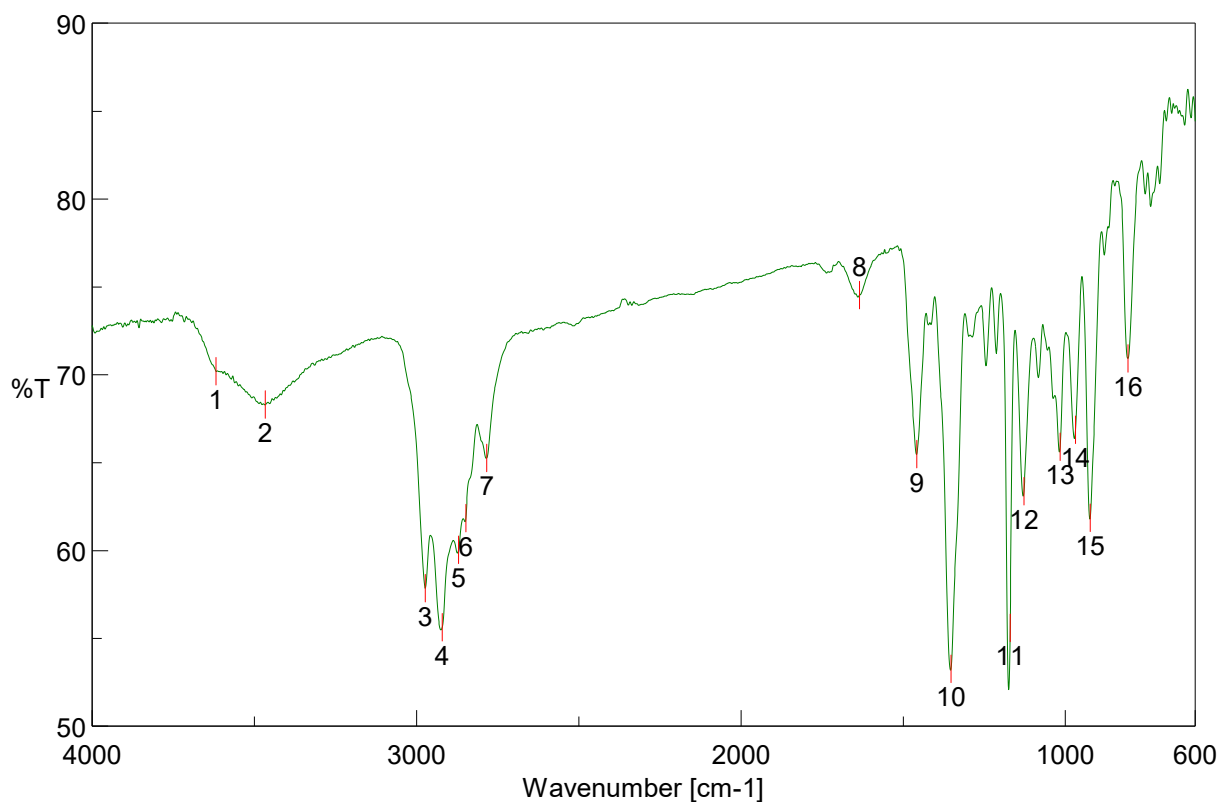

[Comments]

Sample name  
 Comment  
 User  
 Division  
 Company NCSU

[Detailed Information]

Creation date 10/28/2020 12:18 PM  
 Data array type Linear data array  
 Horizontal axis Wavenumber [cm-1]  
 Vertical axis %T  
 Start 0 cm-1  
 End 7800.65 cm-1  
 Data interval 0.964233 cm-1  
 Data points 8091

[Measurement Information]

Model Name FT/IR-4100typeA  
 Serial Number B096961016  
 Measurement Date 10/28/2020 12:18 PM  
 Light Source Standard  
 Detector TGS  
 Accumulation 8  
 Resolution 4 cm-1  
 Zero Filling On  
 Apodization Cosine  
 Gain Auto (2)  
 Aperture Auto (7.1 mm)  
 Scanning Speed Auto (2 mm/sec)  
 Filter Auto (30000 Hz)

[ Result of Peak Picking ]

| No. | Position | Intensity | No. | Position | Intensity |
|-----|----------|-----------|-----|----------|-----------|
| 1   | 3618.77  | 70.1974   | 2   | 3466.42  | 68.291    |

[ Result of Peak Picking ]

| No. | Position | Intensity | No. | Position | Intensity |
|-----|----------|-----------|-----|----------|-----------|
| 3   | 2972.73  | 57.8428   | 4   | 2920.66  | 55.6257   |
| 5   | 2870.52  | 60.0382   | 6   | 2848.35  | 61.8297   |
| 7   | 2783.74  | 65.2512   | 8   | 1634.38  | 74.5281   |
| 9   | 1457.92  | 65.4666   | 10  | 1352.82  | 53.2574   |
| 11  | 1170.58  | 55.5926   | 12  | 1128.15  | 63.3658   |
| 13  | 1016.3   | 65.8924   | 14  | 969.055  | 66.8618   |
| 15  | 923.736  | 61.8592   | 16  | 807.063  | 70.9281   |

High resolution mass spectrometry and infrared spectroscopy data for S-(2-((4-(dimethylamino)-1-oxyl-2,2,5,5-tetramethylpyrrolidin-3-yl)methoxy)ethyl) methanesulfonylthioate **20**

### Full Scan Positive Ion Mode

| Sample | M <sub>Theoretical</sub> | M <sub>Experimental</sub> | ΔM (ppm) | Elemental Composition                                                        |
|--------|--------------------------|---------------------------|----------|------------------------------------------------------------------------------|
|        | 354.16415                | 354.16460                 | 1.256    | C <sub>14</sub> H <sub>29</sub> N <sub>2</sub> O <sub>4</sub> S <sub>2</sub> |
|        | [M+H] <sup>+</sup>       | [M+H] <sup>+</sup>        |          |                                                                              |

201999\_MAV-801 #41-75 RT: 0.25-0.43 AV: 35 NL: 8.38E8  
T: FTMS + p ESI Full ms [100.0000-800.0000]

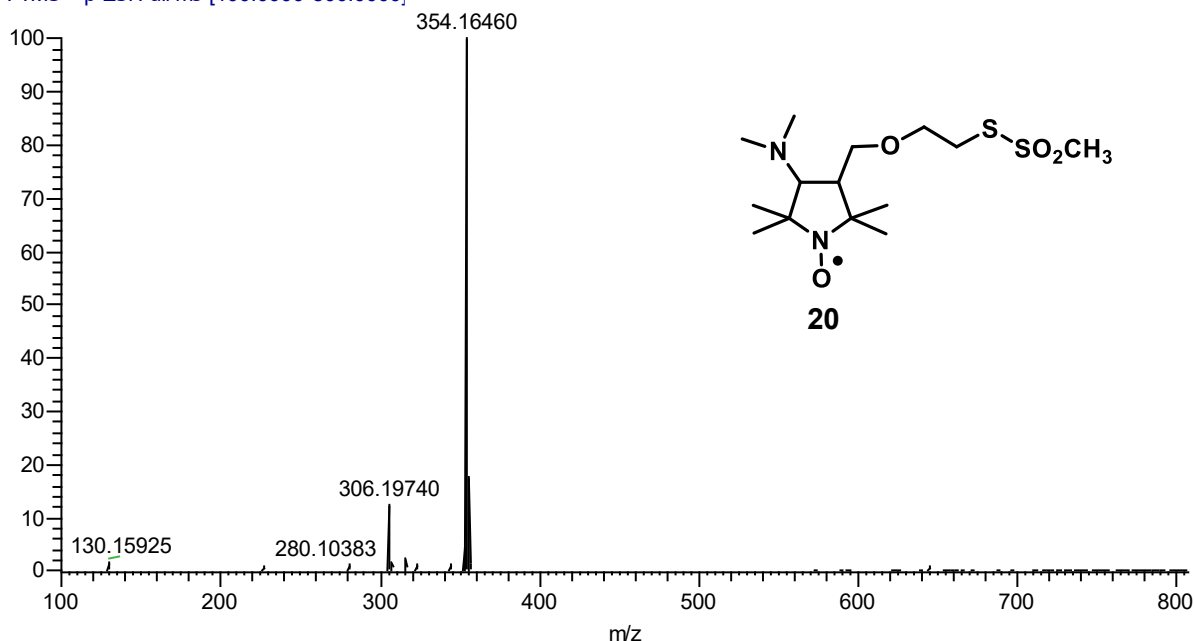

### Experimental and Theoretical Isotopic Distribution for C<sub>14</sub>H<sub>29</sub>N<sub>2</sub>O<sub>4</sub>S<sub>2</sub> [M+H]<sup>+</sup>

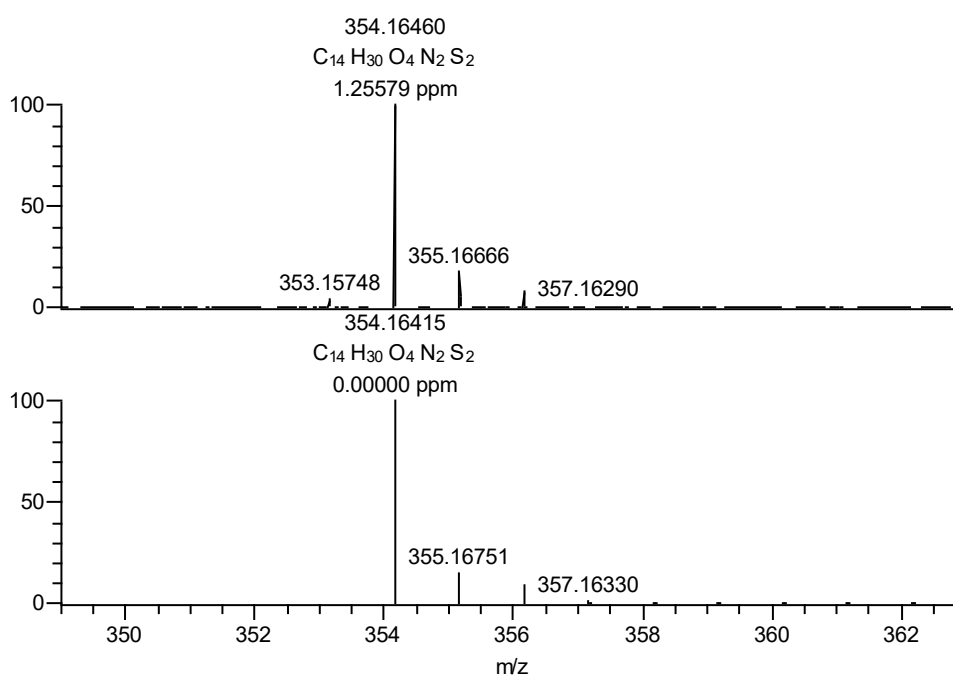

NL:  
8.38E8  
201999\_MAV-801#41-  
75 RT: 0.25-0.43 AV:  
35 T: FTMS + p ESI Full  
ms  
[100.0000-800.0000]

NL:  
7.59E5  
C<sub>14</sub> H<sub>29</sub> N<sub>2</sub> O<sub>4</sub> S<sub>2</sub> +H:  
C<sub>14</sub> H<sub>30</sub> N<sub>2</sub> O<sub>4</sub> S<sub>2</sub>  
pa Chrg 1

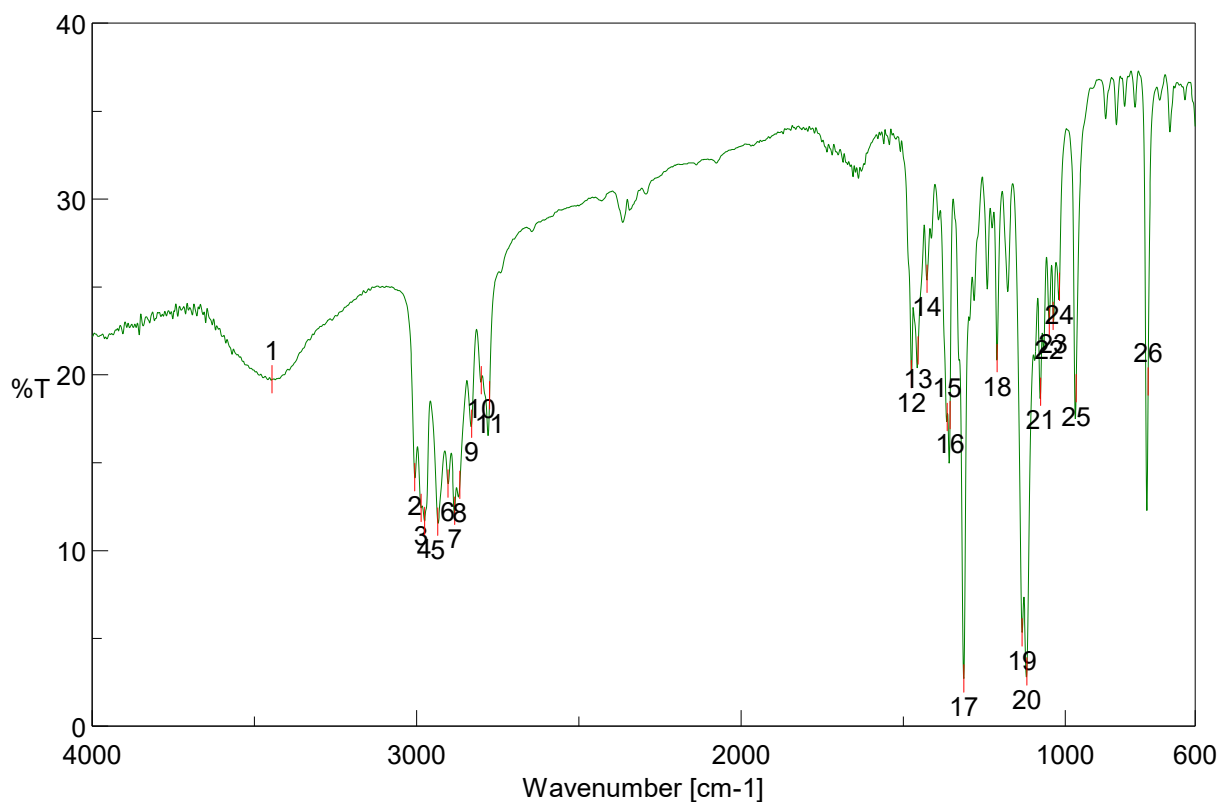

[Comments]

Sample name  
 Comment  
 User  
 Division  
 Company NCSU

[Detailed Information]

Creation date 5/3/2021 5:27 PM  
 Data array type Linear data array  
 Horizontal axis Wavenumber [cm-1]  
 Vertical axis %T  
 Start 0 cm-1  
 End 7800.65 cm-1  
 Data interval 0.964233 cm-1  
 Data points 8091

[Measurement Information]

Model Name FT/IR-4100typeA  
 Serial Number B096961016  
 Measurement Date 5/3/2021 5:27 PM  
 Light Source Standard  
 Detector TGS  
 Accumulation 8  
 Resolution 4 cm-1  
 Zero Filling On  
 Apodization Cosine  
 Gain Auto (4)  
 Aperture Auto (7.1 mm)  
 Scanning Speed Auto (2 mm/sec)  
 Filter Auto (30000 Hz)

[ Result of Peak Picking ]

| No. | Position | Intensity | No. | Position | Intensity |
|-----|----------|-----------|-----|----------|-----------|
| 1   | 3445.21  | 19.7408   | 2   | 3005.52  | 14.1668   |

[ Result of Peak Picking ]

| No. | Position | Intensity | No. | Position | Intensity |
|-----|----------|-----------|-----|----------|-----------|
| 3   | 2986.23  | 12.4228   | 4   | 2975.62  | 11.6685   |
| 5   | 2935.13  | 11.6297   | 6   | 2903.31  | 13.8028   |
| 7   | 2882.09  | 12.2527   | 8   | 2866.67  | 13.7305   |
| 9   | 2830.03  | 17.1978   | 10  | 2800.13  | 19.6884   |
| 11  | 2775.06  | 18.8241   | 12  | 1475.28  | 20.02     |
| 13  | 1454.06  | 21.3693   | 14  | 1426.1   | 25.4487   |
| 15  | 1364.39  | 17.5799   | 16  | 1355.71  | 17.6991   |
| 17  | 1313.29  | 2.71494   | 18  | 1210.11  | 20.9324   |
| 19  | 1133.94  | 5.33361   | 20  | 1118.51  | 3.10737   |
| 21  | 1076.08  | 19.0231   | 22  | 1050.05  | 23.0105   |
| 23  | 1037.52  | 23.3326   | 24  | 1018.23  | 24.9893   |
| 25  | 967.126  | 19.2327   | 26  | 745.352  | 19.6099   |

High resolution mass spectrometry and infrared spectroscopy data for spin-labeled 1,2-dipalmitoyl-*sn*-glycero-3-phosphothioethanol (**20-PTE**)

**Full Scan Positive Ion Mode:**

| Sample | M <sub>Theoretical</sub>          | M <sub>Experimental</sub>         | ΔM (ppm) | Elemental Composition                                                                          |
|--------|-----------------------------------|-----------------------------------|----------|------------------------------------------------------------------------------------------------|
|        | 1004.62927<br>[M+H] <sup>+</sup>  | 1004.62864<br>[M+H] <sup>+</sup>  | -0.62538 | C <sub>50</sub> H <sub>98</sub> O <sub>10</sub> N <sub>2</sub> NaPS <sub>2</sub>               |
|        | 1026.61122<br>[M+Na] <sup>+</sup> | 1026.61118<br>[M+Na] <sup>+</sup> | -0.03024 | C <sub>50</sub> H <sub>97</sub> O <sub>10</sub> N <sub>2</sub> Na <sub>2</sub> PS <sub>2</sub> |

2015\_MAV-820\_20221003134024 #142-285 RT: 0.74-1.48 AV: 144 NL: 1.21E9

T: FTMS + p NSI Full ms [200.0000-2500.0000]

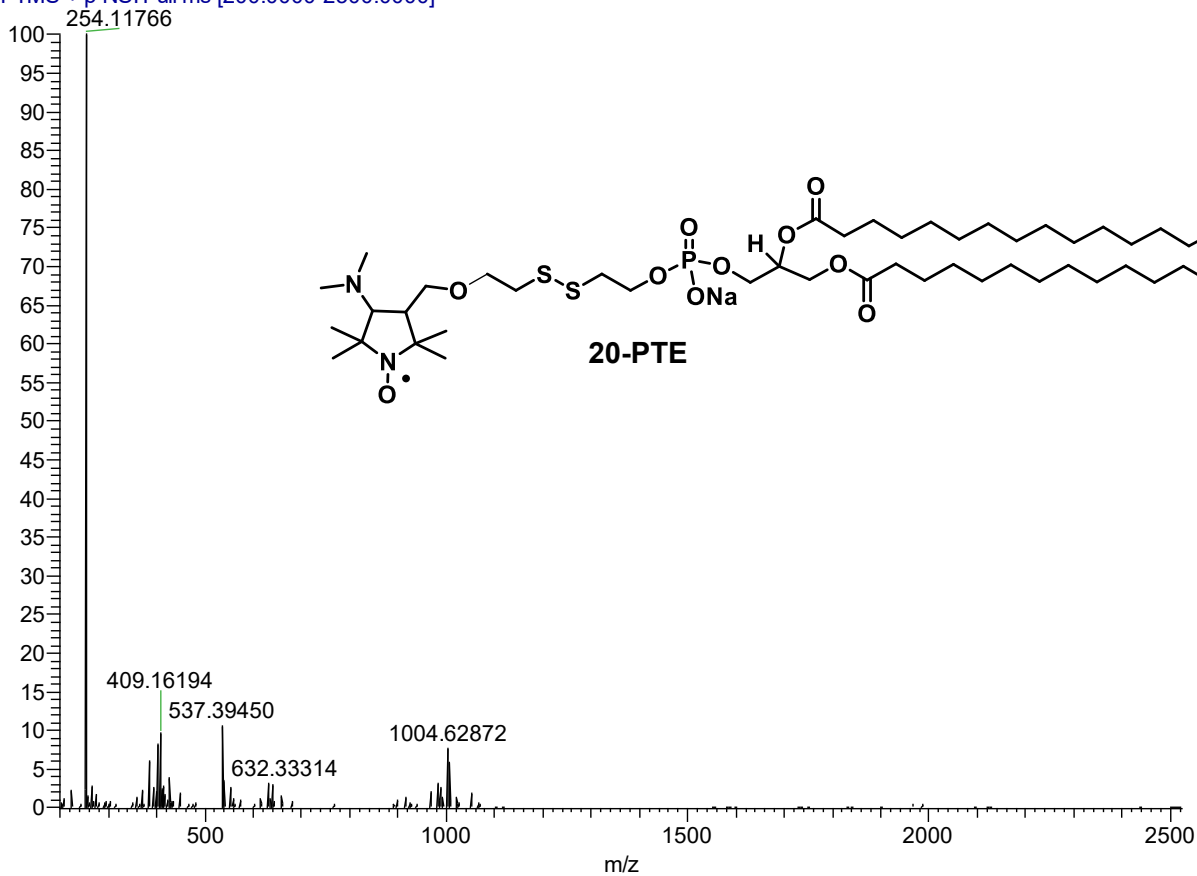



### Experimental and Theoretical Isotopic Distribution [M+H]<sup>+</sup>

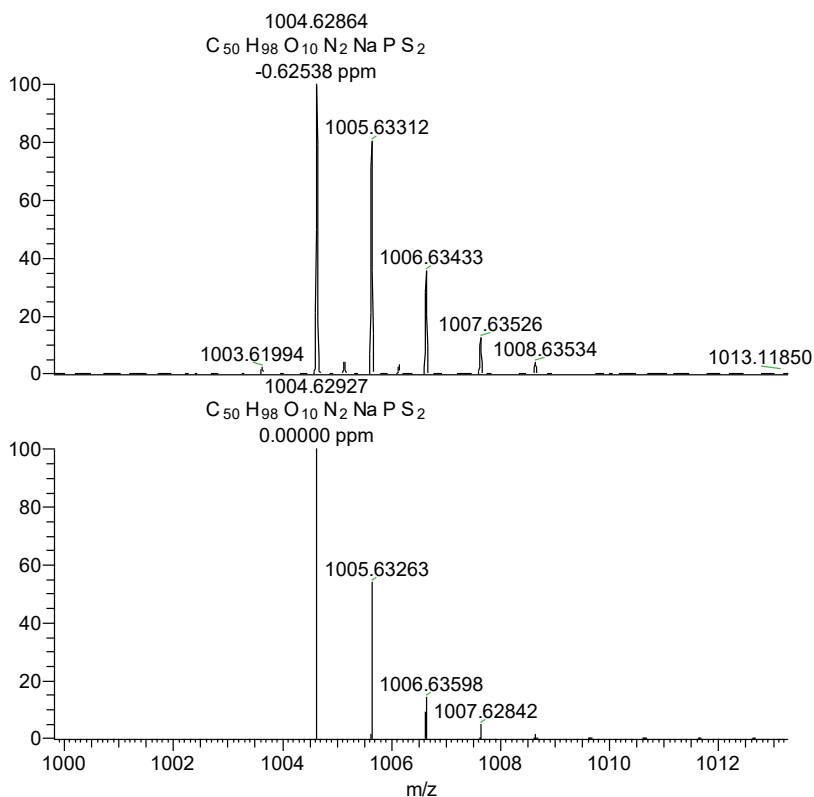

NL:  
6.47E7  
2015\_MAV-  
820\_20221003134024#3-  
385 RT: 0.03-2.00 AV: 383  
T: FTMS + p NSI Full ms  
[200.0000-2500.0000]

NL:  
5.04E5  
C<sub>50</sub>H<sub>97</sub>N<sub>2</sub>NaO<sub>10</sub>PS<sub>2</sub>+H:  
C<sub>50</sub>H<sub>98</sub>N<sub>2</sub>Na<sub>1</sub>O<sub>10</sub>P<sub>1</sub>S<sub>2</sub>  
pa Chrg 1

### Experimental and Theoretical Isotopic Distribution [M+Na]<sup>+</sup>

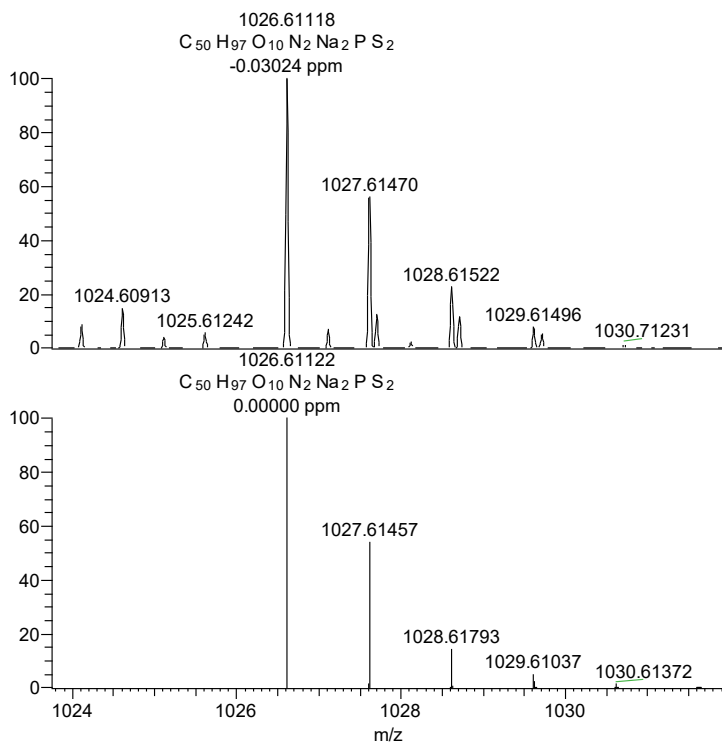

NL:  
9.46E6  
2015\_MAV-  
820\_20221003134024#3-385  
RT: 0.03-2.00 AV: 383 T:  
FTMS + p NSI Full ms  
[200.0000-2500.0000]

NL:  
5.04E5  
C<sub>50</sub>H<sub>97</sub>N<sub>2</sub>NaO<sub>10</sub>PS<sub>2</sub>+Na:  
C<sub>50</sub>H<sub>97</sub>N<sub>2</sub>Na<sub>2</sub>O<sub>10</sub>P<sub>1</sub>S<sub>2</sub>  
pa Chrg 1

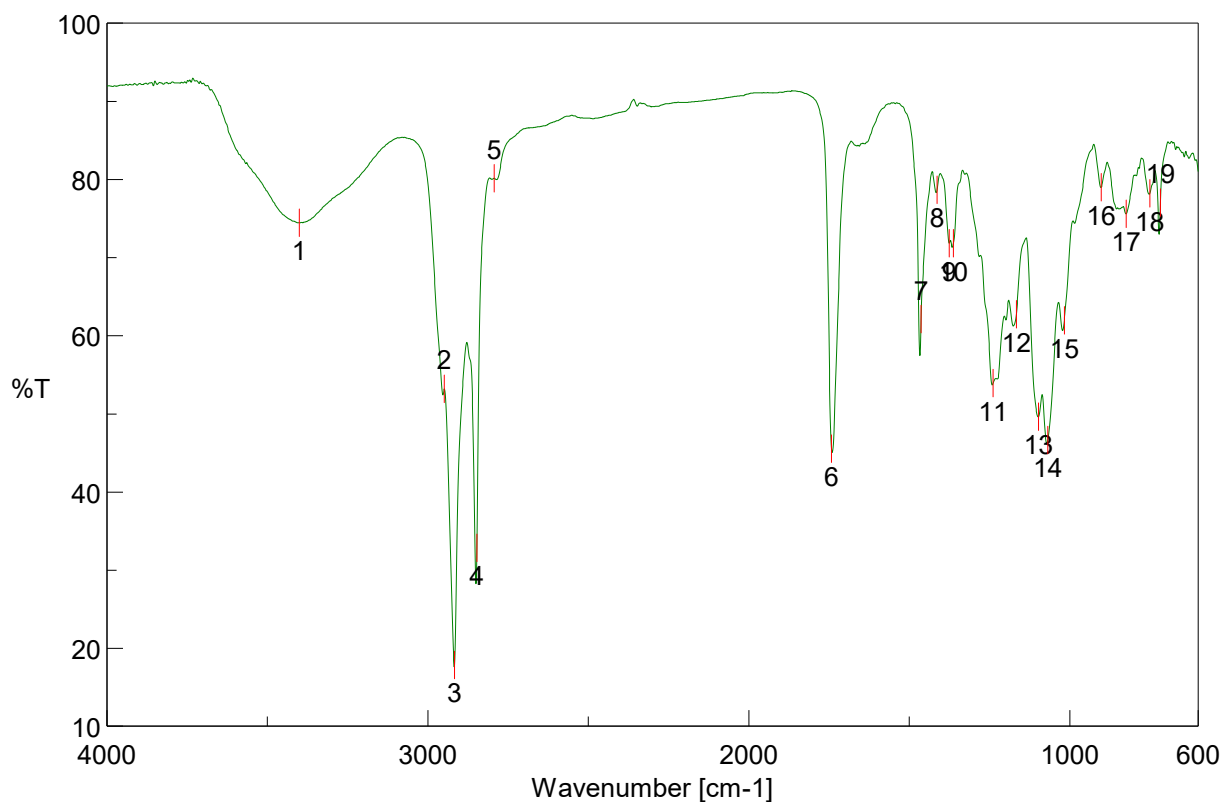

[Comments]

Sample name  
 Comment  
 User  
 Division  
 Company NCSU

[Detailed Information]

Creation date 9/26/2022 7:07 PM  
 Data array type Linear data array  
 Horizontal axis Wavenumber [cm-1]  
 Vertical axis %T  
 Start 0 cm-1  
 End 7800.65 cm-1  
 Data interval 0.964233 cm-1  
 Data points 8091

[Measurement Information]

Model Name FT/IR-4100typeA  
 Serial Number B096961016  
 Measurement Date 9/26/2022 7:07 PM  
 Light Source Standard  
 Detector TGS  
 Accumulation 8  
 Resolution 4 cm-1  
 Zero Filling On  
 Apodization Cosine  
 Gain Auto (2)  
 Aperture Auto (7.1 mm)  
 Scanning Speed Auto (2 mm/sec)  
 Filter Auto (30000 Hz)

[ Result of Peak Picking ]

| No. | Position | Intensity | No. | Position | Intensity |
|-----|----------|-----------|-----|----------|-----------|
| 1   | 3400.85  | 74.4349   | 2   | 2948.63  | 53.1614   |

[ Result of Peak Picking ]

| No. | Position | Intensity | No. | Position | Intensity |
|-----|----------|-----------|-----|----------|-----------|
| 3   | 2916.81  | 17.8431   | 4   | 2847.38  | 32.8334   |
| 5   | 2793.38  | 80.1263   | 6   | 1742.37  | 45.5065   |
| 7   | 1463.71  | 62.0918   | 8   | 1413.57  | 78.6566   |
| 9   | 1375.96  | 71.8064   | 10  | 1362.46  | 71.831    |
| 11  | 1239.04  | 53.9045   | 12  | 1166.72  | 62.74     |
| 13  | 1097.3   | 49.5932   | 14  | 1068.37  | 46.6213   |
| 15  | 1017.27  | 61.9442   | 16  | 902.523  | 78.9726   |
| 17  | 824.42   | 75.5977   | 18  | 750.174  | 78.1889   |
| 19  | 717.39   | 77.0028   |     |          |           |

High resolution mass spectrometry and infrared spectroscopy data for (2-Bromoethyl)carbamic acid (4-dimethylamino-1-oxyl-2,2,5,5-tetramethylpyrrolidin-3-yl)methyl ester **21**

**Full Scan Positive Ion Mode**

365.13086 [M+H]<sup>+</sup> 365.13080 [M+H]<sup>+</sup> -0.162 C<sub>14</sub>H<sub>27</sub>BrN<sub>3</sub>O<sub>3</sub>

200088\_MAV-760 #48-58 RT: 0.34-0.39 AV: 11 NI: 1 82F8

T: FTMS + p ESI Full ms [200.0000-1000.C

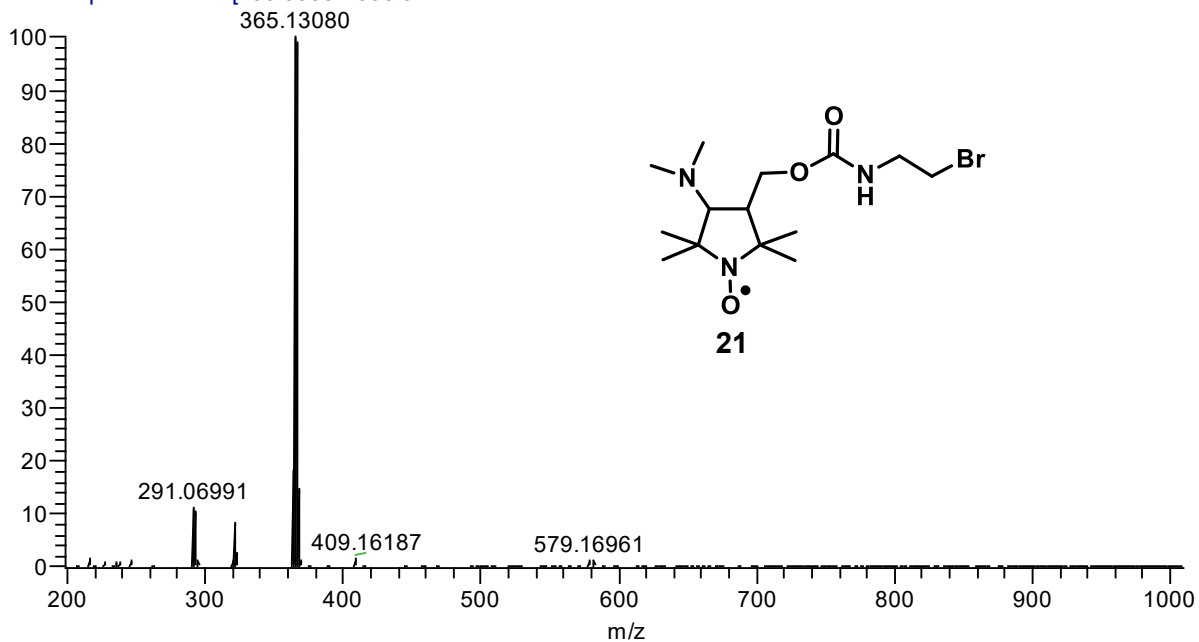

200088\_MAV-760 #46-52 RT: 0.33-0.36 AV: 7 NL: 2.49E8

T: FTMS + p ESI Full ms [200.0000-1000.000

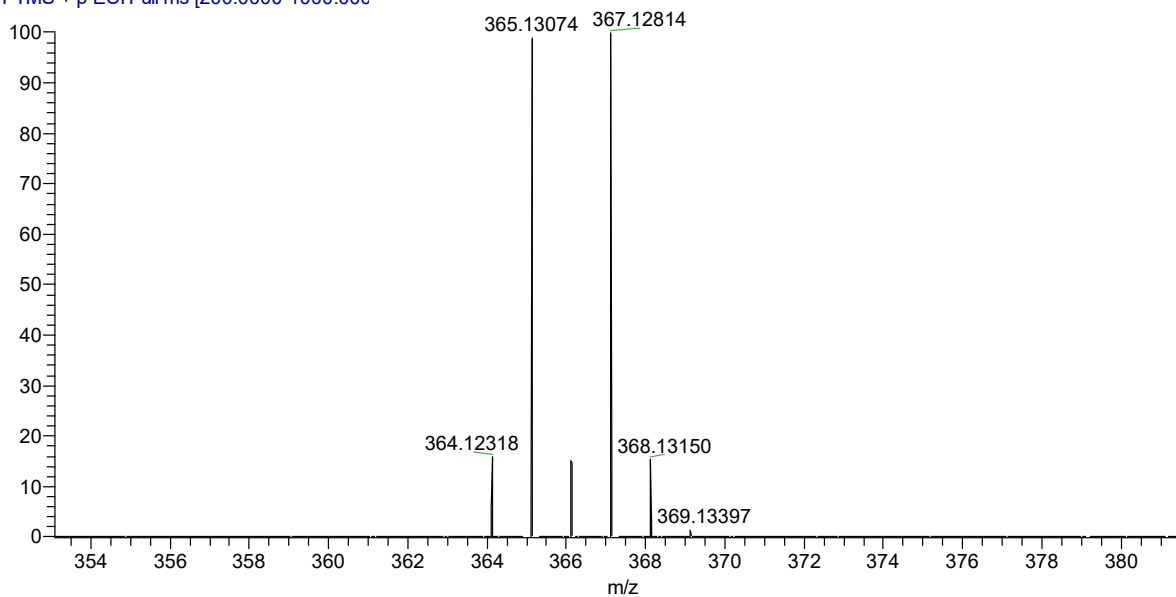

**Experimental and Theoretical Isotopic Distribution  $C_{14}H_{27}BrN_3O_3 [M+H]^+$**

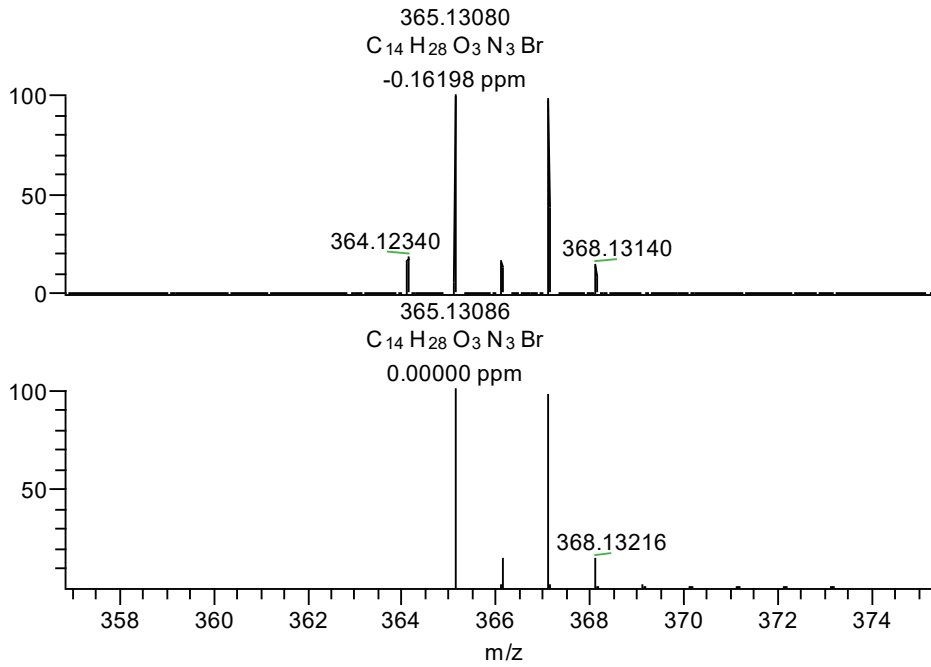

NL:  
1.82E8  
200088\_MAV-760#48-  
58 RT: 0.34-0.39 AV:  
11 T: FTMS + p ESI Full  
ms  
[200.0000-1000.0000]

NL:  
4.27E5  
 $C_{14}H_{27}BrN_3O_3 + H$ :  
 $C_{14}H_{28}BrN_3O_3$   
pa Chrg 1

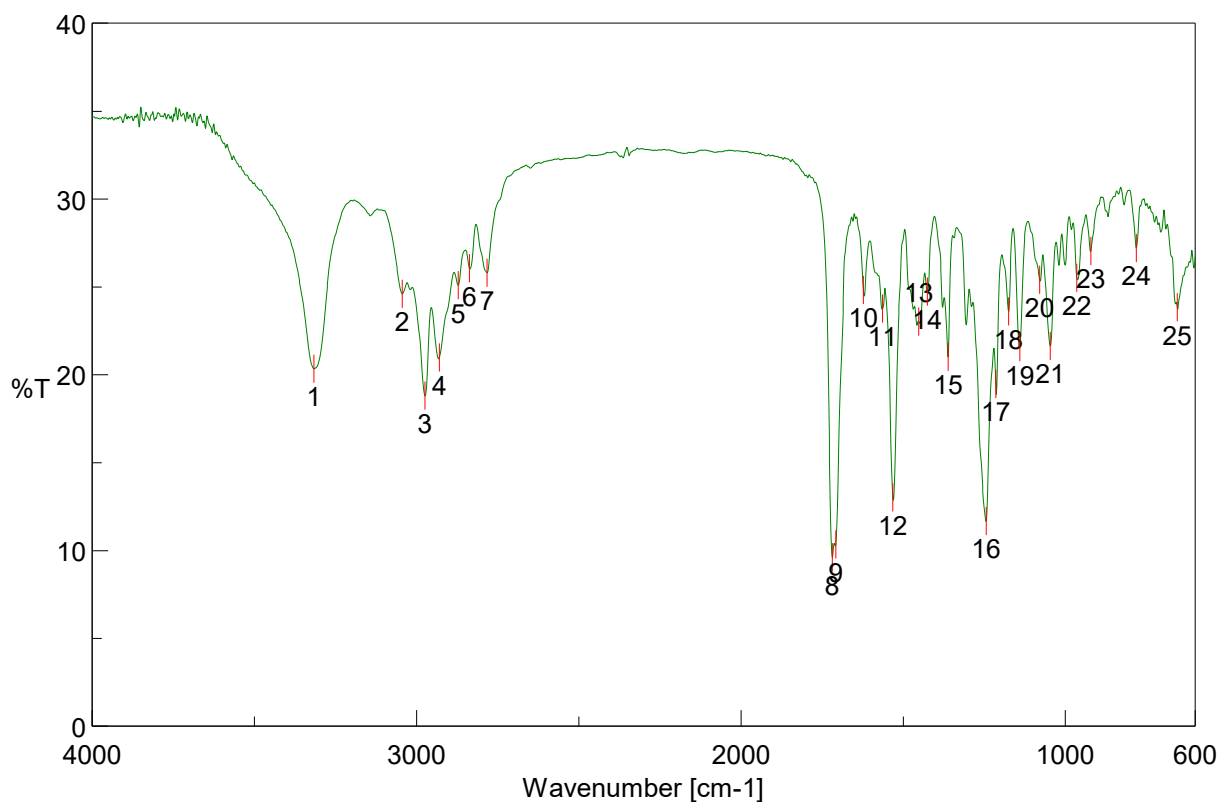

[Comments]

Sample name  
 Comment  
 User  
 Division  
 Company NCSU

[Detailed Information]

Creation date 10/11/2022 2:06 PM  
 Data array type Linear data array  
 Horizontal axis Wavenumber [cm-1]  
 Vertical axis %T  
 Start 0 cm-1  
 End 7800.65 cm-1  
 Data interval 0.964233 cm-1  
 Data points 8091

[Measurement Information]

Model Name FT/IR-4100typeA  
 Serial Number B096961016  
 Measurement Date 10/11/2022 2:05 PM  
 Light Source Standard  
 Detector TGS  
 Accumulation 8  
 Resolution 4 cm-1  
 Zero Filling On  
 Apodization Cosine  
 Gain Auto (4)  
 Aperture Auto (7.1 mm)  
 Scanning Speed Auto (2 mm/sec)  
 Filter Auto (30000 Hz)

[ Result of Peak Picking ]

| No. | Position | Intensity | No. | Position | Intensity |
|-----|----------|-----------|-----|----------|-----------|
| 1   | 3316     | 20.3333   | 2   | 3044.09  | 24.5964   |

[ Result of Peak Picking ]

| No. | Position | Intensity | No. | Position | Intensity |
|-----|----------|-----------|-----|----------|-----------|
| 3   | 2974.66  | 18.8008   | 4   | 2929.34  | 20.9828   |
| 5   | 2871.49  | 25.0804   | 6   | 2836.77  | 26.0503   |
| 7   | 2782.78  | 25.7923   | 8   | 1718.26  | 9.61838   |
| 9   | 1707.66  | 10.3379   | 10  | 1622.8   | 24.8163   |
| 11  | 1563.99  | 23.7571   | 12  | 1532.17  | 13.025    |
| 13  | 1452.14  | 23.013    | 14  | 1425.14  | 24.7208   |
| 15  | 1361.5   | 21.0186   | 16  | 1243.86  | 11.664    |
| 17  | 1214.93  | 19.462    | 18  | 1175.4   | 23.588    |
| 19  | 1140.69  | 21.5649   | 20  | 1078.98  | 25.407    |
| 21  | 1047.16  | 21.6272   | 22  | 965.198  | 25.4993   |
| 23  | 921.807  | 27.0407   | 24  | 781.029  | 27.1928   |
| 25  | 655.679  | 23.8309   |     |          |           |

High resolution mass spectrometry and infrared spectroscopy data for (2-((methylsulfonyl)thio)ethyl)carbamic acid (4-(dimethylamino)-1-oxyl-2,2,5,5-tetramethylpyrrolidin-3-yl)methyl ester **22**

| Sample | M <sub>Theoretical</sub> | M <sub>Experimental</sub> | ΔM (ppm) | Elemental Composition                                                        |
|--------|--------------------------|---------------------------|----------|------------------------------------------------------------------------------|
|        | 397.16996                | 397.16975                 | -0.550   | C <sub>15</sub> H <sub>30</sub> N <sub>3</sub> O <sub>5</sub> S <sub>2</sub> |
|        | [M+H] <sup>+</sup>       | [M+H] <sup>+</sup>        |          |                                                                              |

201610\_MAV-763 #47-72 RT: 0.27-0.40 AV: 26 SB: 34 0.00-0.19 NL: 1.07E8

T: FTMS + p ESI Full ms [100.0000-800.0000]

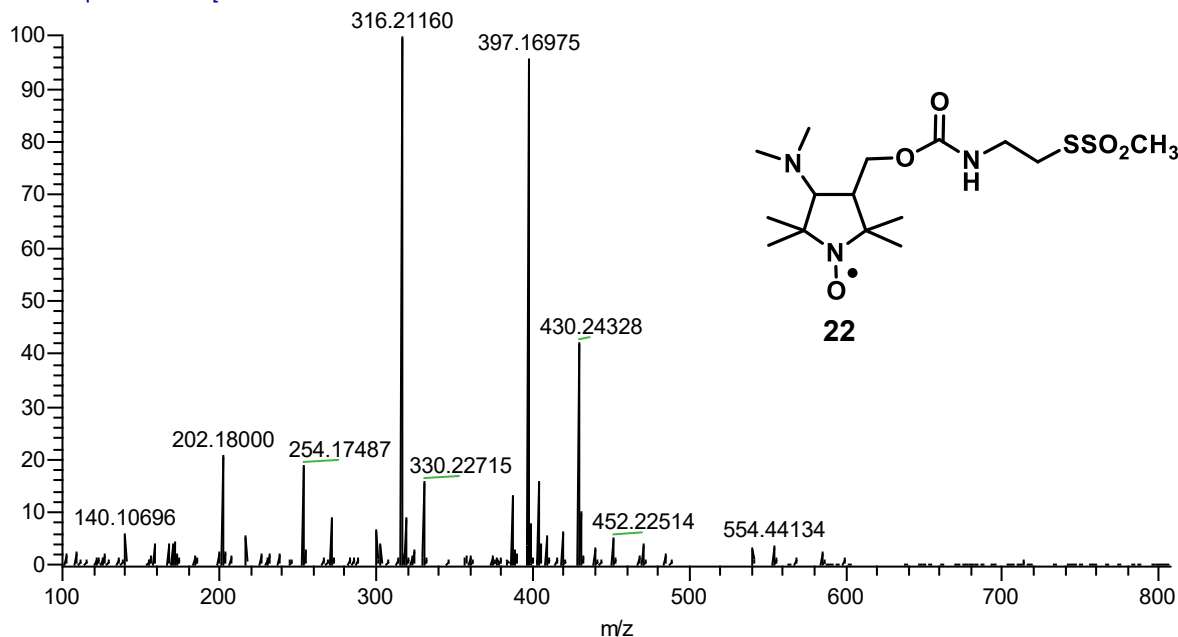

**Experimental and Theoretical Isotopic Distribution for C<sub>15</sub>H<sub>30</sub>N<sub>3</sub>O<sub>5</sub>S<sub>2</sub> [M+H]<sup>+</sup>**

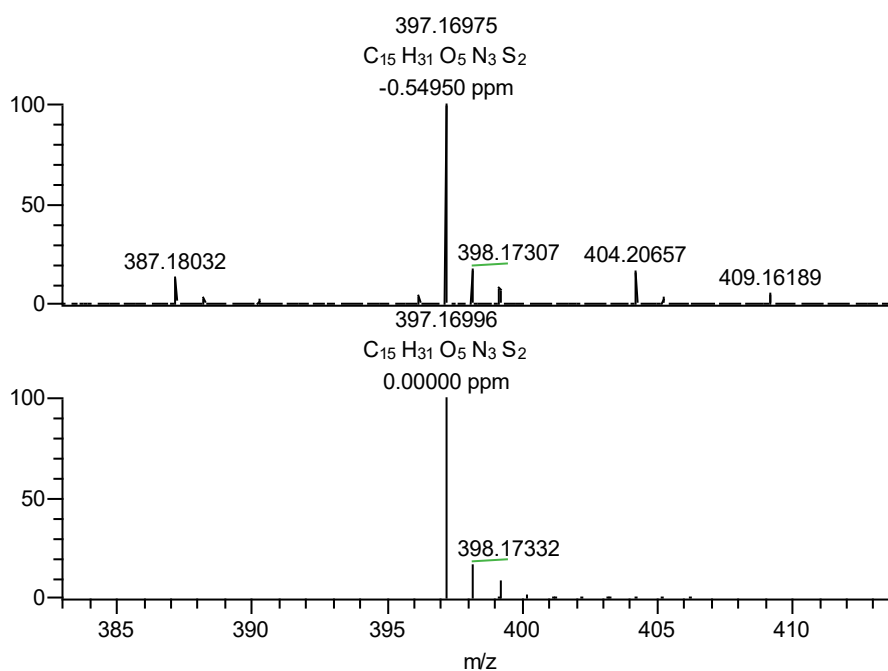

NL:  
 1.03E8  
 201610\_MAV-763#47-72  
 RT: 0.27-0.40 AV: 26 SB:  
 34 0.00-0.19 T: FTMS + p  
 ESI Full ms  
 [100.0000-800.0000]

NL:  
 7.47E5  
 C<sub>15</sub>H<sub>30</sub>N<sub>3</sub>O<sub>5</sub>S<sub>2</sub> +H:  
 C<sub>15</sub>H<sub>31</sub>N<sub>3</sub>O<sub>5</sub>S<sub>2</sub>  
 pa Chrg 1



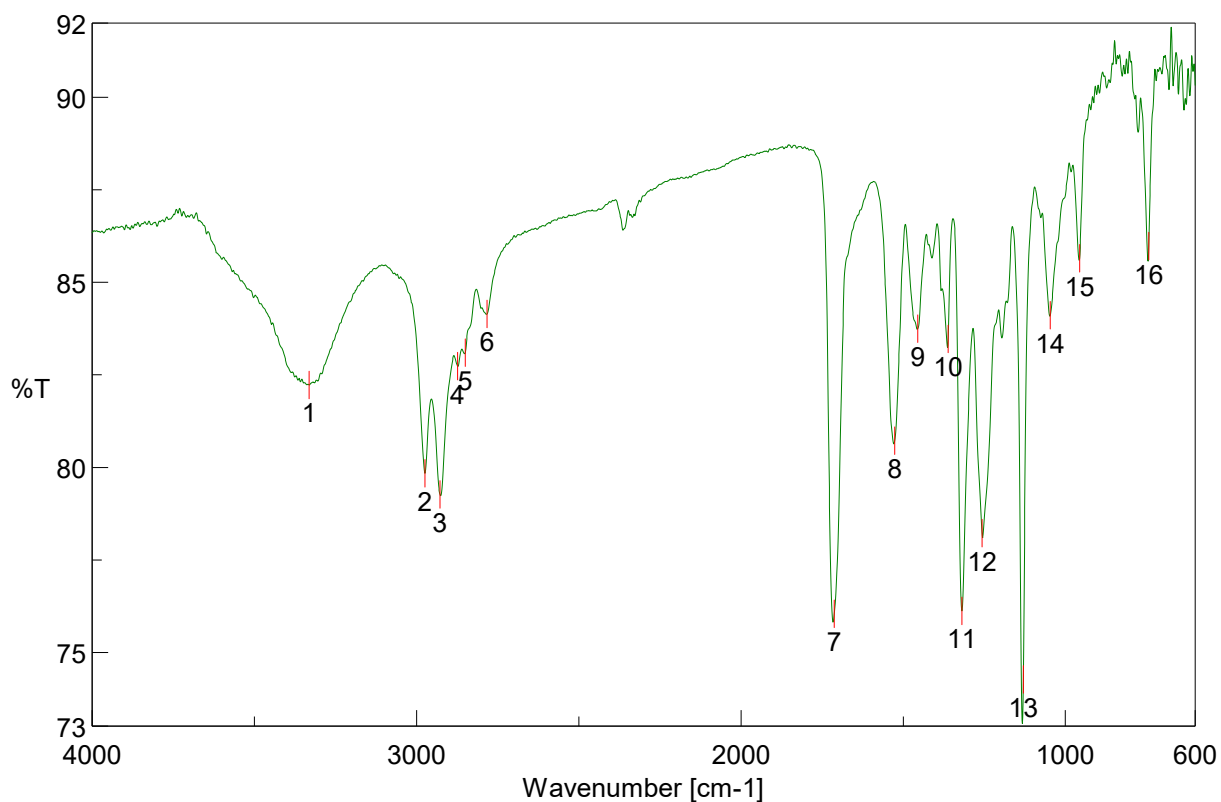

[Comments]

Sample name  
 Comment  
 User  
 Division  
 Company NCSU

[Detailed Information]

Creation date 10/12/2022 6:22 PM  
 Data array type Linear data array  
 Horizontal axis Wavenumber [cm-1]  
 Vertical axis %T  
 Start 0 cm-1  
 End 7800.65 cm-1  
 Data interval 0.964233 cm-1  
 Data points 8091

[Measurement Information]

Model Name FT/IR-4100typeA  
 Serial Number B096961016  
 Measurement Date 10/12/2022 6:22 PM  
 Light Source Standard  
 Detector TGS  
 Accumulation 8  
 Resolution 4 cm-1  
 Zero Filling On  
 Apodization Cosine  
 Gain Auto (2)  
 Aperture Auto (7.1 mm)  
 Scanning Speed Auto (2 mm/sec)  
 Filter Auto (30000 Hz)

[ Result of Peak Picking ]

| No. | Position | Intensity | No. | Position | Intensity |
|-----|----------|-----------|-----|----------|-----------|
| 1   | 3331.43  | 82.218    | 2   | 2974.66  | 79.8324   |

[ Result of Peak Picking ]

| No. | Position | Intensity | No. | Position | Intensity |
|-----|----------|-----------|-----|----------|-----------|
| 3   | 2927.41  | 79.2577   | 4   | 2873.42  | 82.7303   |
| 5   | 2850.27  | 83.0937   | 6   | 2782.78  | 84.1349   |
| 7   | 1712.48  | 76.0352   | 8   | 1526.38  | 80.7102   |
| 9   | 1455.03  | 83.7415   | 10  | 1361.5   | 83.4605   |
| 11  | 1319.07  | 76.1133   | 12  | 1257.36  | 78.214    |
| 13  | 1130.08  | 74.2629   | 14  | 1047.16  | 84.1031   |
| 15  | 956.52   | 85.6395   | 16  | 743.424  | 85.9732   |

High resolution mass spectrometry and infrared spectroscopy data for spin-labeled 1,2-dipalmitoyl-*sn*-glycero-3-phosphothioethanol (**22-PTE**)

**Full Scan Positive Ion Mode**

| Sample | M <sub>Theoretical</sub> | M <sub>Experimental</sub> | ΔM (ppm) | Elemental Composition                                                            |
|--------|--------------------------|---------------------------|----------|----------------------------------------------------------------------------------|
|        | 1047.63508               | 1047.63213                | -2.823   | C <sub>51</sub> H <sub>98</sub> N <sub>3</sub> NaO <sub>11</sub> PS <sub>2</sub> |
|        | [M+H] <sup>+</sup>       | [M+H] <sup>+</sup>        |          |                                                                                  |

210445\_MAV-775\_SYR#131-157 RT: 0.58-0.70 AV: 27 NL: 1.36E8

T: FTMS + p ESI Full ms [200.0000-1500.000]

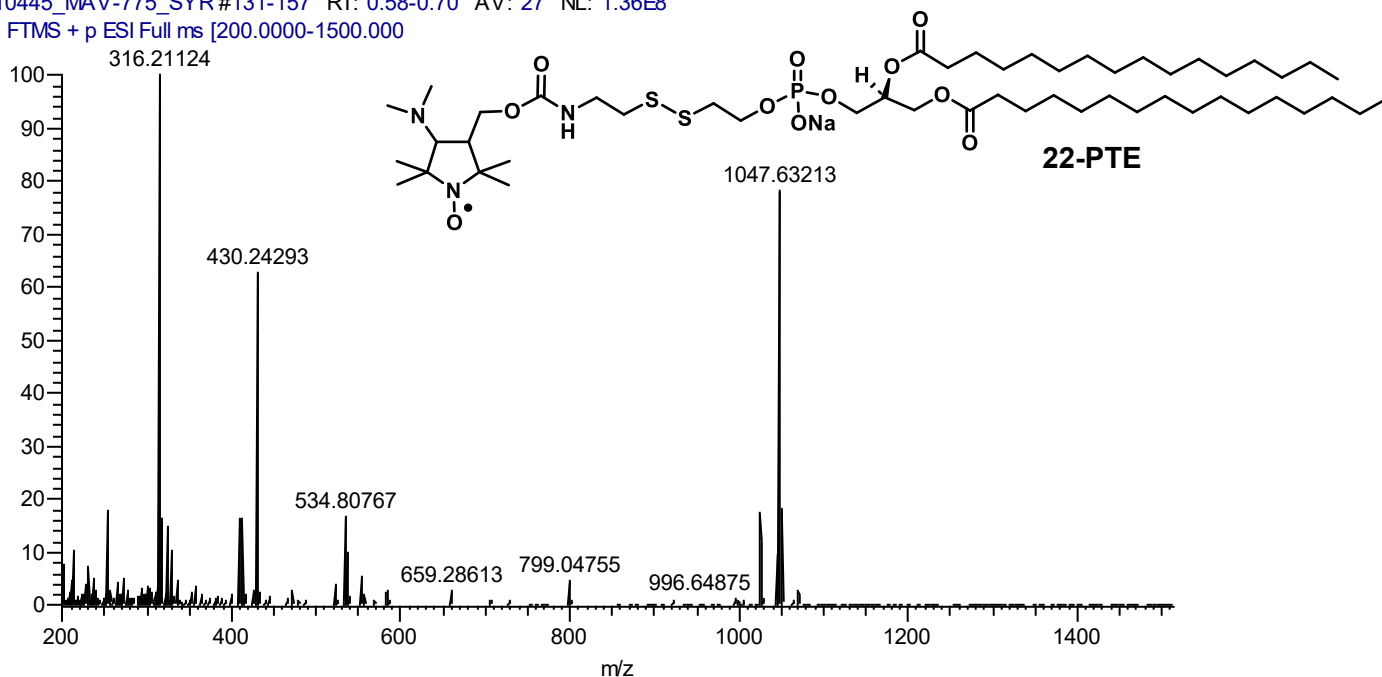

**Experimental and Theoretical Isotopic Distribution for C<sub>51</sub>H<sub>98</sub>N<sub>3</sub>NaO<sub>11</sub>PS<sub>2</sub> [M+H]<sup>+</sup>**

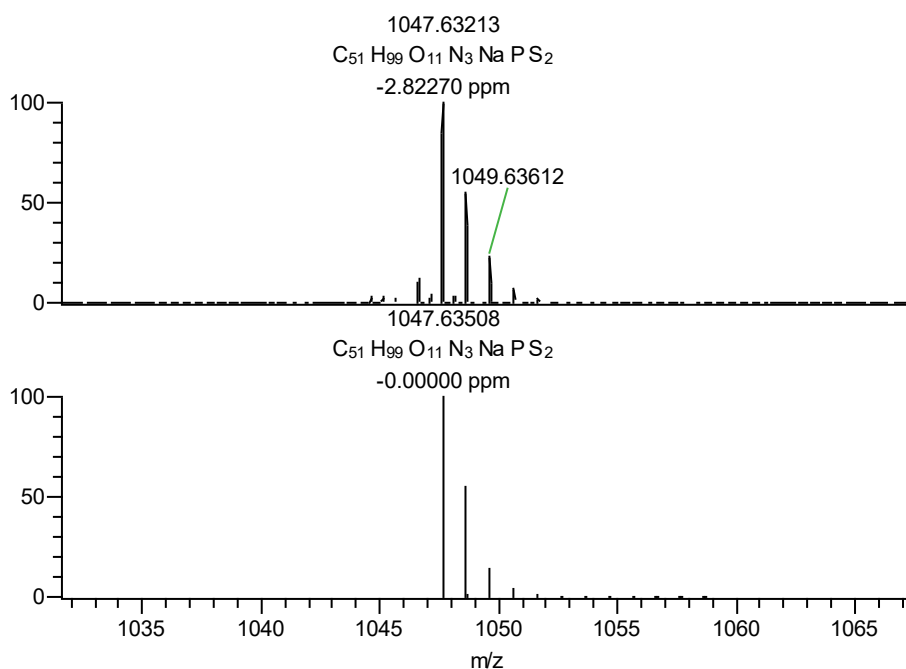

NL:  
1.07E8  
210445\_MAV-  
775\_SYR#131-157 RT:  
0.58-0.70 AV: 27 T: FTMS  
+ p ESI Full ms  
[200.0000-1500.0000]

NL:  
4.96E5  
C<sub>51</sub>H<sub>98</sub>N<sub>3</sub>NaO<sub>11</sub>PS<sub>2</sub> +H:  
C<sub>51</sub>H<sub>99</sub>N<sub>3</sub>Na<sub>1</sub>O<sub>11</sub>P<sub>1</sub>S<sub>2</sub>  
pa Chrg 1

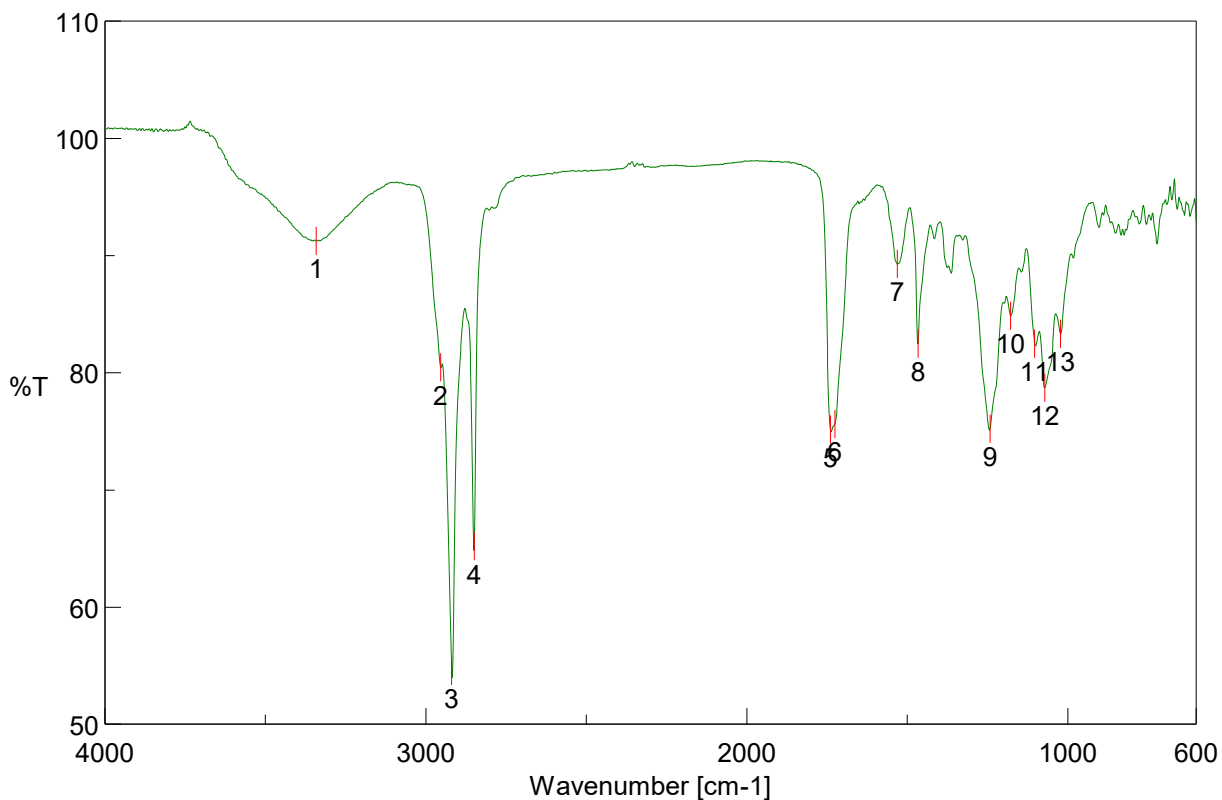

[Comments]

Sample name  
 Comment  
 User  
 Division  
 Company NCSU

[Detailed Information]

Creation date 10/7/2022 4:56 PM  
 Date modified 10/7/2022 4:58 PM  
 Data array type Linear data array  
 Horizontal axis Wavenumber [cm-1]  
 Vertical axis %T  
 Start 0 cm-1  
 End 7800.65 cm-1  
 Data interval 0.964233 cm-1  
 Data points 8091

[Measurement Information]

Model Name FT/IR-4100typeA  
 Serial Number B096961016  
 Measurement Date 10/7/2022 4:56 PM  
 Light Source Standard  
 Detector TGS  
 Accumulation 8  
 Resolution 4 cm-1  
 Zero Filling On  
 Apodization Cosine  
 Gain Auto (2)  
 Aperture Auto (7.1 mm)  
 Scanning Speed Auto (2 mm/sec)  
 Filter Auto (30000 Hz)

[ Result of Peak Picking ]

| No. | Position | Intensity | No. | Position | Intensity |
|-----|----------|-----------|-----|----------|-----------|
| 1   | 3342.03  | 91.2333   | 2   | 2954.41  | 80.4377   |

[ Result of Peak Picking ]

| No. | Position | Intensity | No. | Position | Intensity |
|-----|----------|-----------|-----|----------|-----------|
| 3   | 2919.7   | 54.5241   | 4   | 2849.31  | 65.1899   |
| 5   | 1739.48  | 75.1469   | 6   | 1725.98  | 75.6222   |
| 7   | 1531.2   | 89.2798   | 8   | 1466.6   | 82.4726   |
| 9   | 1241.93  | 75.1994   | 10  | 1178.29  | 84.8485   |
| 11  | 1103.08  | 82.4722   | 12  | 1071.26  | 78.7106   |
| 13  | 1023.05  | 83.3303   |     |          |           |

High resolution mass spectrometry and infrared spectroscopy data for spin-labeled 1,2-dioleoyl-*sn*-glycero-3-phosphoethanolamine (**23-DOPE**)

**Full Scan Positive Ion Mode**

| Sample | M <sub>Theoretical</sub> | M <sub>Experimental</sub> | ΔM (ppm) | Elemental Composition                                             |
|--------|--------------------------|---------------------------|----------|-------------------------------------------------------------------|
|        | 906.64326                | -                         | -        | C <sub>49</sub> H <sub>91</sub> N <sub>2</sub> NaO <sub>9</sub> P |
|        | [M+H] <sup>+</sup>       | [M+H] <sup>+</sup>        |          |                                                                   |
|        | 884.66132                | -                         | -        | C <sub>49</sub> H <sub>92</sub> N <sub>2</sub> O <sub>9</sub> P   |
|        | [M+H] <sup>+</sup>       | [M+H] <sup>+</sup>        |          |                                                                   |

220102\_MAV841 #100-117 RT: 0.54-0.63 AV: 18 NL: 2.48E7

T: FTMS + p ESI Full ms [200.0000-1000.0000]

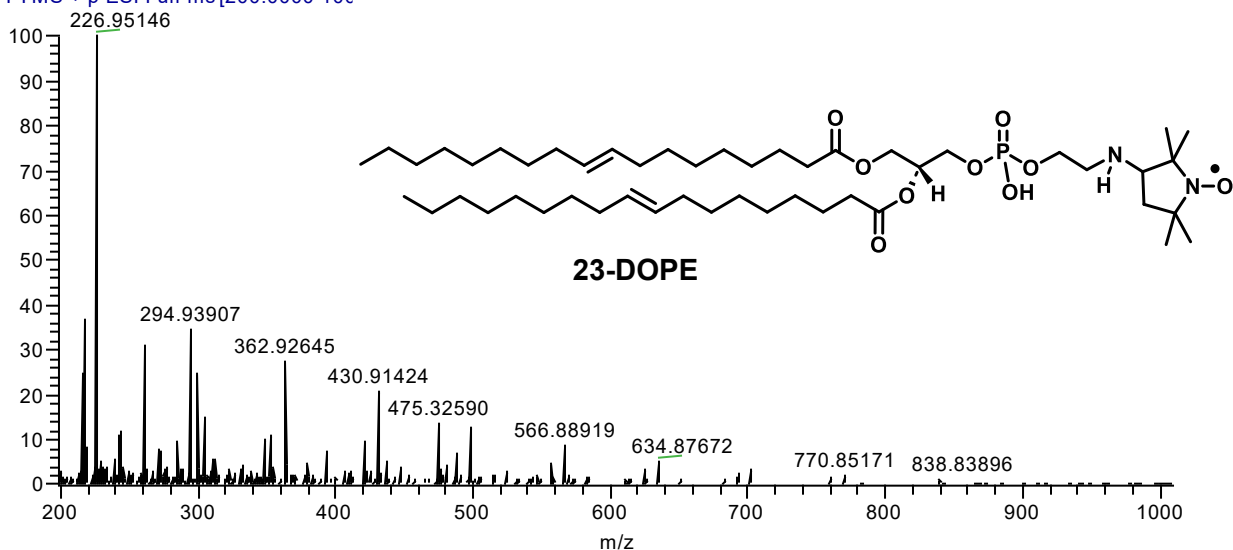

**Experimental and Theoretical Isotopic Distribution for C<sub>49</sub>H<sub>91</sub>N<sub>2</sub>NaO<sub>9</sub>P [M+H]<sup>+</sup>**

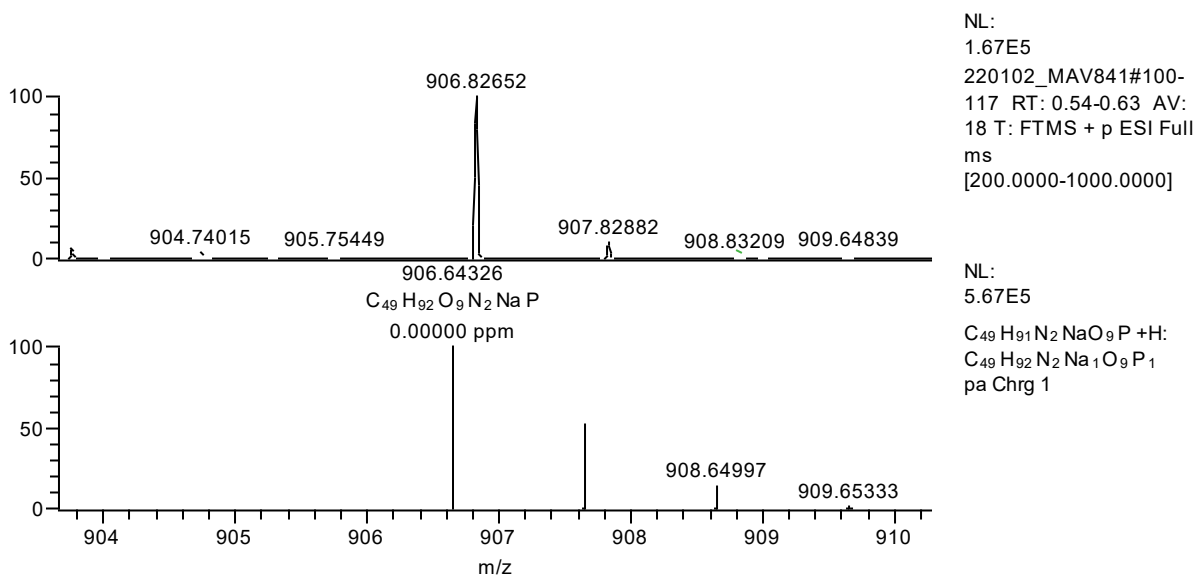

### Full Scan Positive Ion Mode

220102\_MAV841 #214-218 RT: 1.16-1.18 AV: 5 NL: 2.36E3  
T: FTMS + p ESI Full ms [200.0000-1000.0000]

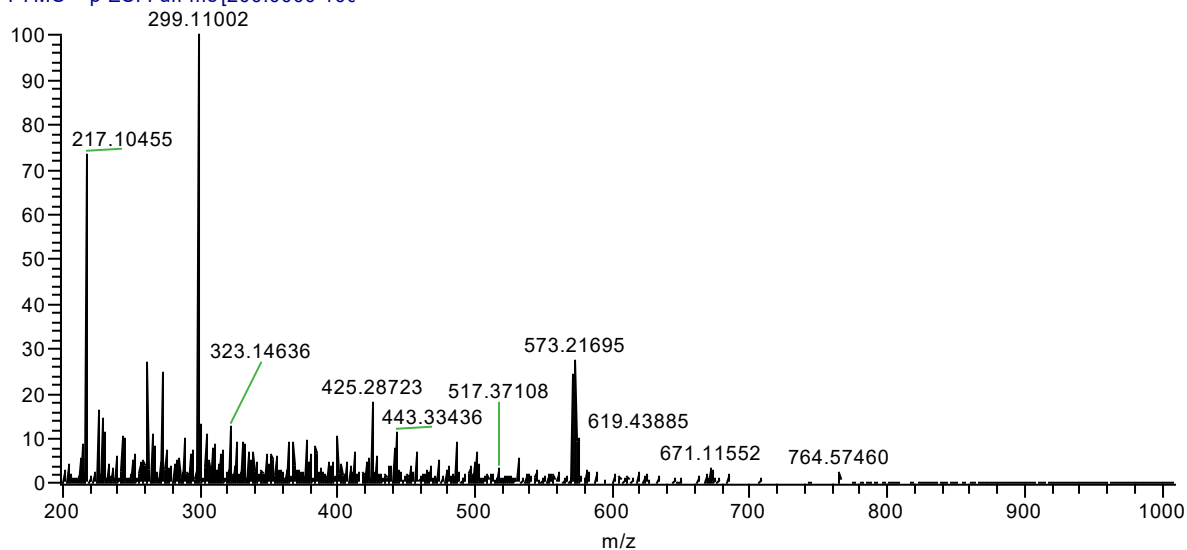

### Experimental and Theoretical Isotopic Distribution for $C_{49}H_{92}N_2O_9P [M+H]^+$

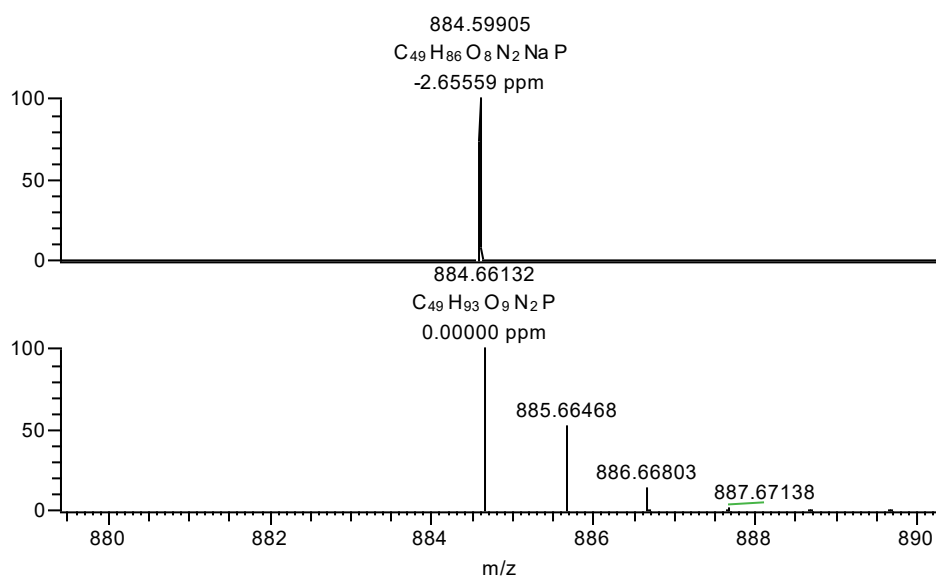

NL:  
2.36E3  
220102\_MAV841#214-  
218 RT: 1.16-1.18 AV:  
5 T: FTMS + p ESI Full  
ms  
[200.0000-1000.0000]

NL:  
5.67E5  
 $C_{49}H_{92}N_2O_9P + H$ :  
 $C_{49}H_{93}N_2O_9P_1$   
pa Chrg 1

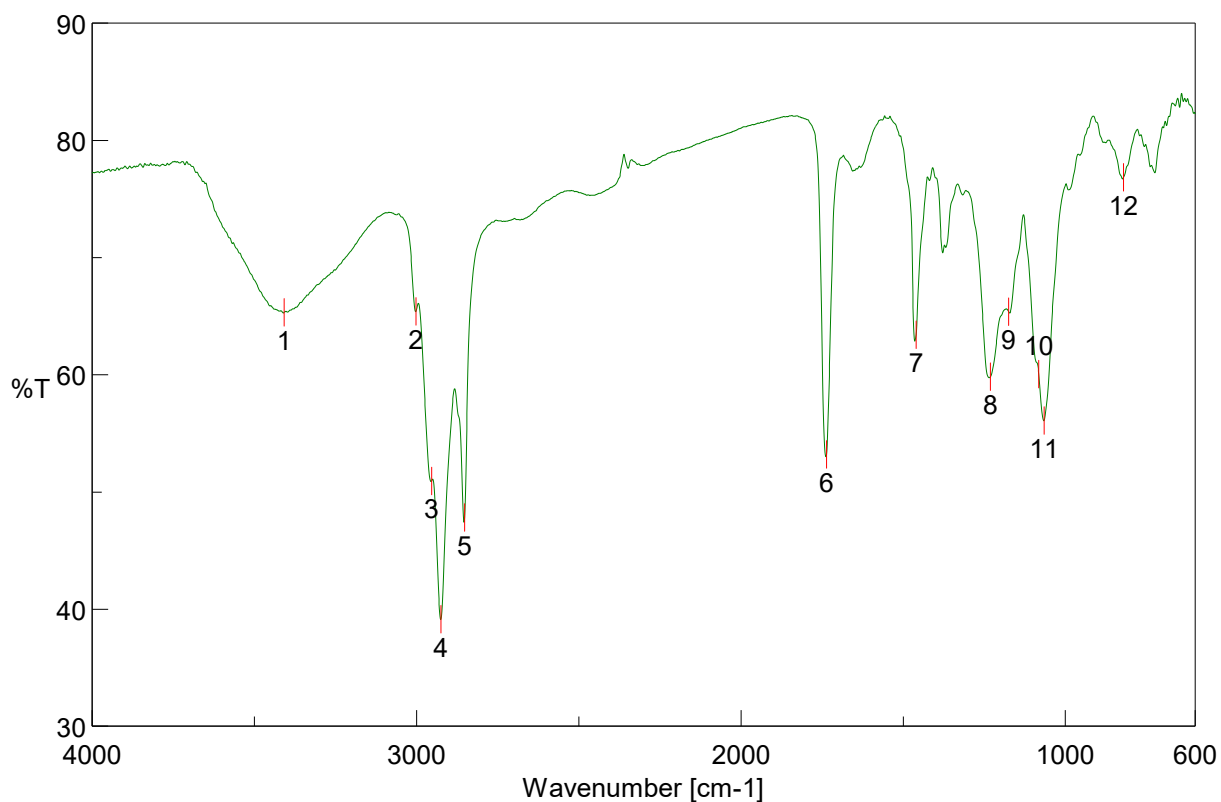

[Comments]

Sample name  
 Comment  
 User  
 Division  
 Company NCSU

[Detailed Information]

Creation date 6/1/2022 6:10 PM  
 Data array type Linear data array  
 Horizontal axis Wavenumber [cm-1]  
 Vertical axis %T  
 Start 0 cm-1  
 End 7800.65 cm-1  
 Data interval 0.964233 cm-1  
 Data points 8091

[Measurement Information]

Model Name FT/IR-4100typeA  
 Serial Number B096961016  
 Measurement Date 6/1/2022 6:10 PM  
 Light Source Standard  
 Detector TGS  
 Accumulation 8  
 Resolution 4 cm-1  
 Zero Filling On  
 Apodization Cosine  
 Gain Auto (2)  
 Aperture Auto (7.1 mm)  
 Scanning Speed Auto (2 mm/sec)  
 Filter Auto (30000 Hz)

[ Result of Peak Picking ]

| No. | Position | Intensity | No. | Position | Intensity |
|-----|----------|-----------|-----|----------|-----------|
| 1   | 3408.57  | 65.3104   | 2   | 3001.66  | 65.4008   |



[ Result of Peak Picking ]

| No. | Position | Intensity | No. | Position | Intensity |
|-----|----------|-----------|-----|----------|-----------|
| 3   | 2953.45  | 50.9282   | 4   | 2924.52  | 39.1205   |
| 5   | 2852.2   | 47.8108   | 6   | 1736.58  | 53.1892   |
| 7   | 1459.85  | 63.4135   | 8   | 1231.33  | 59.8106   |
| 9   | 1175.4   | 65.3799   | 10  | 1081.87  | 60.0277   |
| 11  | 1065.48  | 56.0753   | 12  | 820.563  | 76.8461   |

High resolution mass spectrometry and infrared spectroscopy data for (2-((2-hydroxyethyl)-disulfaneyl)ethyl)carbamic acid (4-(dimethylamino)-1-oxyl-2,2,5,5-tetramethylpyrrolidin-3-yl)methyl ester **24**

| Sample | M <sub>Theoretical</sub> | M <sub>Experimental</sub> | ΔM (ppm) | Elemental Composition                                                        |
|--------|--------------------------|---------------------------|----------|------------------------------------------------------------------------------|
|        | 395.19070                | 395.19043                 | -0.677   | C <sub>16</sub> H <sub>32</sub> N <sub>3</sub> O <sub>4</sub> S <sub>2</sub> |
|        | [M+H] <sup>+</sup>       | [M+H] <sup>+</sup>        |          |                                                                              |

201608\_MAV-765 #51-75 RT: 0.28-0.41 AV: 25 SB: 35 0.00-0.20 NL: 1.00E8

T: FTMS + p ESI Full ms [100.0000-800.0000]

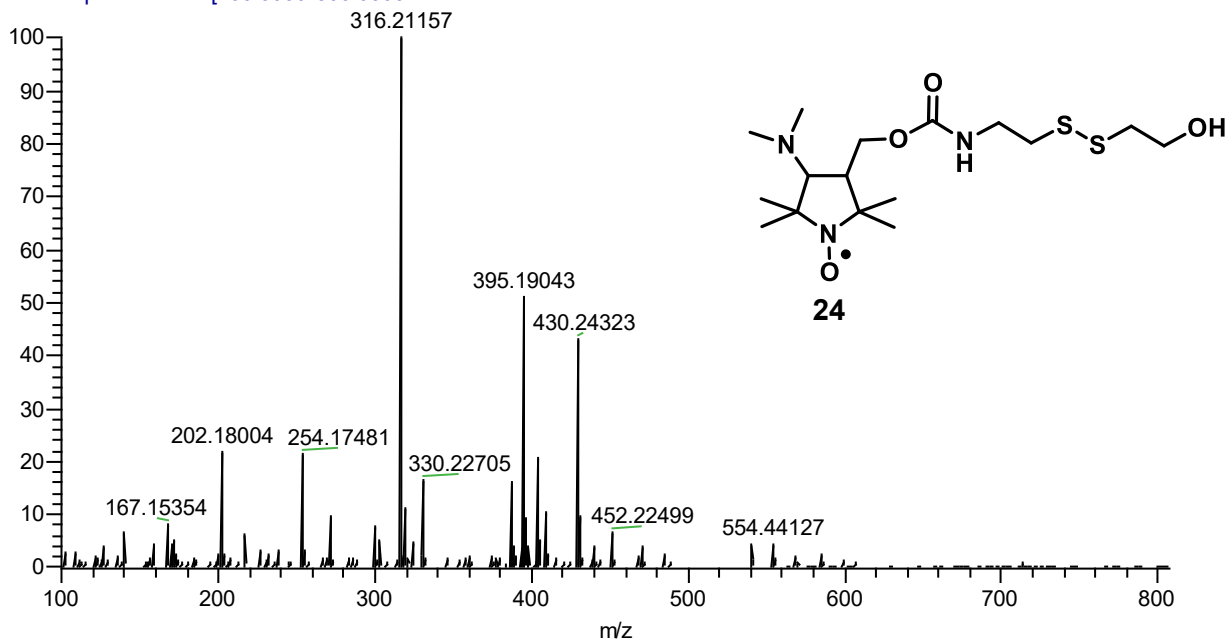

Experimental and Theoretical Isotopic Distribution for C<sub>16</sub>H<sub>32</sub>N<sub>3</sub>O<sub>4</sub>S<sub>2</sub> [M+H]<sup>+</sup>

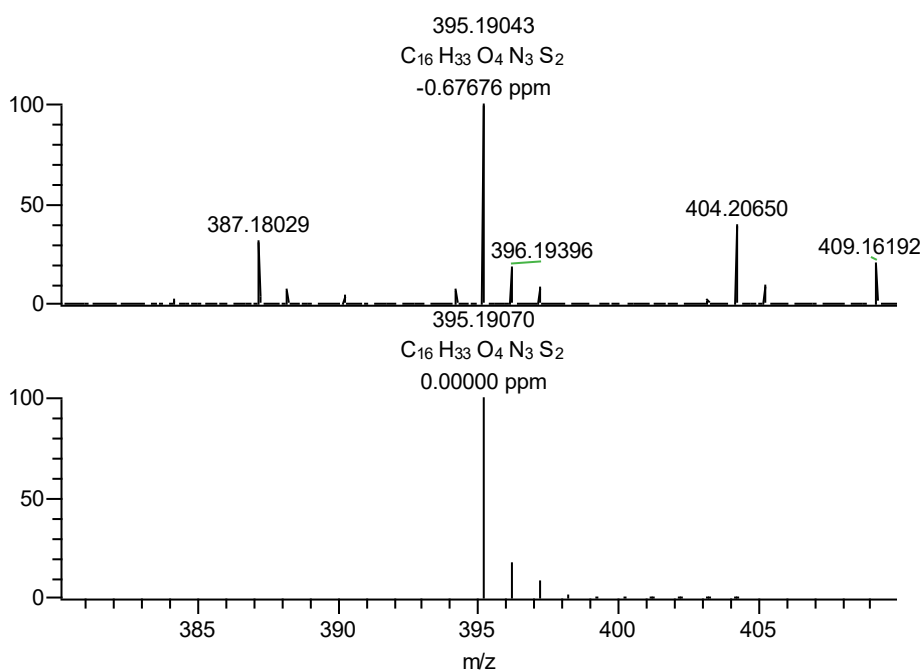

NL:  
5.13E7  
201608\_MAV-765#51-75  
RT: 0.28-0.41 AV: 25 SB:  
35 0.00-0.20 T: FTMS + p  
ESI Full ms  
[100.0000-800.0000]

NL:  
7.40E5  
C<sub>16</sub> H<sub>32</sub> N<sub>3</sub> O<sub>4</sub> S<sub>2</sub> +H:  
C<sub>16</sub> H<sub>33</sub> N<sub>3</sub> O<sub>4</sub> S<sub>2</sub>  
pa Chrg 1

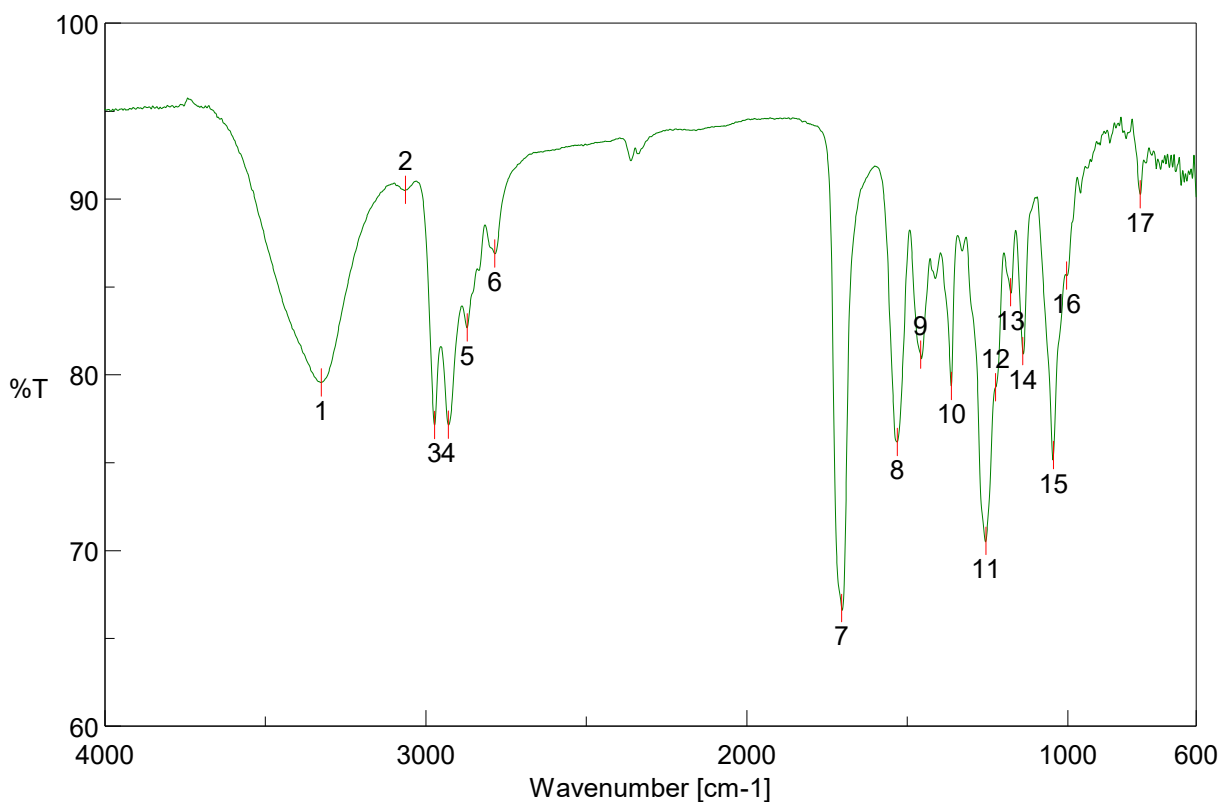

[Comments]

Sample name  
 Comment  
 User  
 Division  
 Company NCSU

[Detailed Information]

Creation date 10/11/2022 5:18 PM  
 Data array type Linear data array  
 Horizontal axis Wavenumber [cm-1]  
 Vertical axis %T  
 Start 0 cm-1  
 End 7800.65 cm-1  
 Data interval 0.964233 cm-1  
 Data points 8091

[Measurement Information]

Model Name FT/IR-4100typeA  
 Serial Number B096961016  
 Measurement Date 10/11/2022 5:18 PM  
 Light Source Standard  
 Detector TGS  
 Accumulation 8  
 Resolution 4 cm-1  
 Zero Filling On  
 Apodization Cosine  
 Gain Auto (2)  
 Aperture Auto (7.1 mm)  
 Scanning Speed Auto (2 mm/sec)  
 Filter Auto (30000 Hz)

[ Result of Peak Picking ]

| No. | Position | Intensity | No. | Position | Intensity |
|-----|----------|-----------|-----|----------|-----------|
| 1   | 3325.64  | 79.5602   | 2   | 3063.37  | 90.5119   |

[ Result of Peak Picking ]

| No. | Position | Intensity | No. | Position | Intensity |
|-----|----------|-----------|-----|----------|-----------|
| 3   | 2972.73  | 77.1282   | 4   | 2930.31  | 77.151    |
| 5   | 2871.49  | 82.6807   | 6   | 2785.67  | 86.883    |
| 7   | 1704.76  | 66.7151   | 8   | 1531.2   | 76.1741   |
| 9   | 1458.89  | 81.1396   | 10  | 1362.46  | 79.3574   |
| 11  | 1255.43  | 70.5369   | 12  | 1225.54  | 79.2781   |
| 13  | 1178.29  | 84.6926   | 14  | 1140.69  | 81.3307   |
| 15  | 1044.26  | 75.4215   | 16  | 1003.77  | 85.6351   |
| 17  | 774.279  | 90.2606   |     |          |           |

High resolution mass spectrometry and infrared spectroscopy data for 3-(dimethylamino)-4-((2-((2-hydroxyethyl)disulfaneyl)ethoxy)methyl)-2,2,5,5-tetramethylpyrrolidin-1-oxyl **25**

**Full Scan Positive Ion Mode**

| Sample | M <sub>Theoretical</sub> | M <sub>Experimental</sub> | ΔM (ppm) | Elemental Composition                                                        |
|--------|--------------------------|---------------------------|----------|------------------------------------------------------------------------------|
|        | 352.18489                | 352.18531                 | 1.203    | C <sub>15</sub> H <sub>31</sub> N <sub>2</sub> O <sub>3</sub> S <sub>2</sub> |
|        | [M+H] <sup>+</sup>       | [M+H] <sup>+</sup>        |          |                                                                              |

202001\_MAV-803 #41-74 RT: 0.25-0.43 AV: 34 NL: 3.52E8  
T: FTMS + p ESI Full ms [100.0000-800.0000]

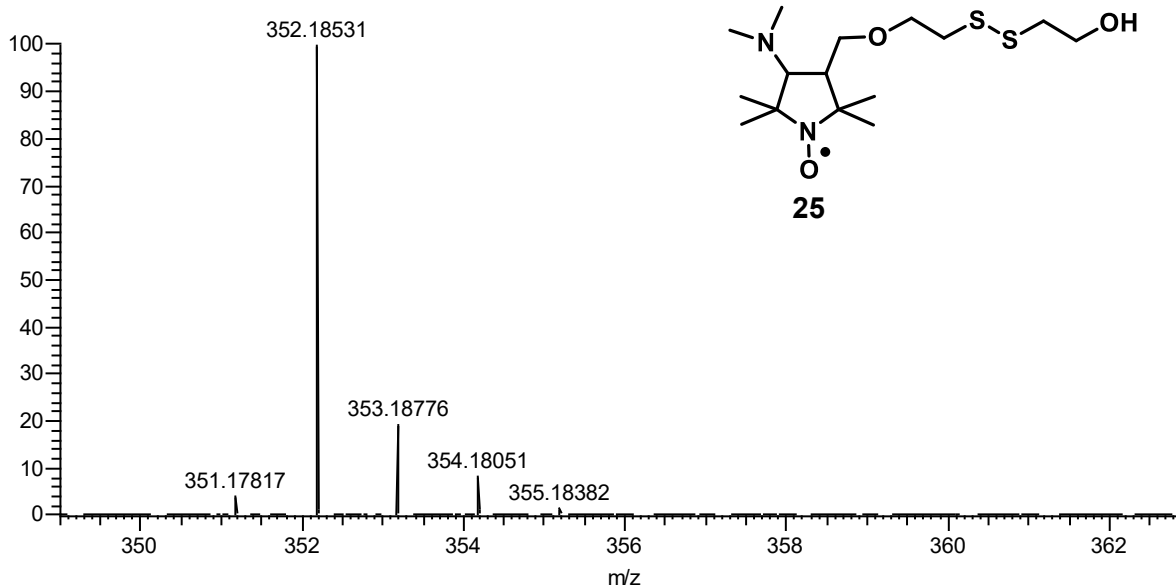

**Experimental and Theoretical Isotopic Distribution for C<sub>15</sub>H<sub>31</sub>N<sub>2</sub>O<sub>3</sub>S<sub>2</sub> [M+H]<sup>+</sup>**

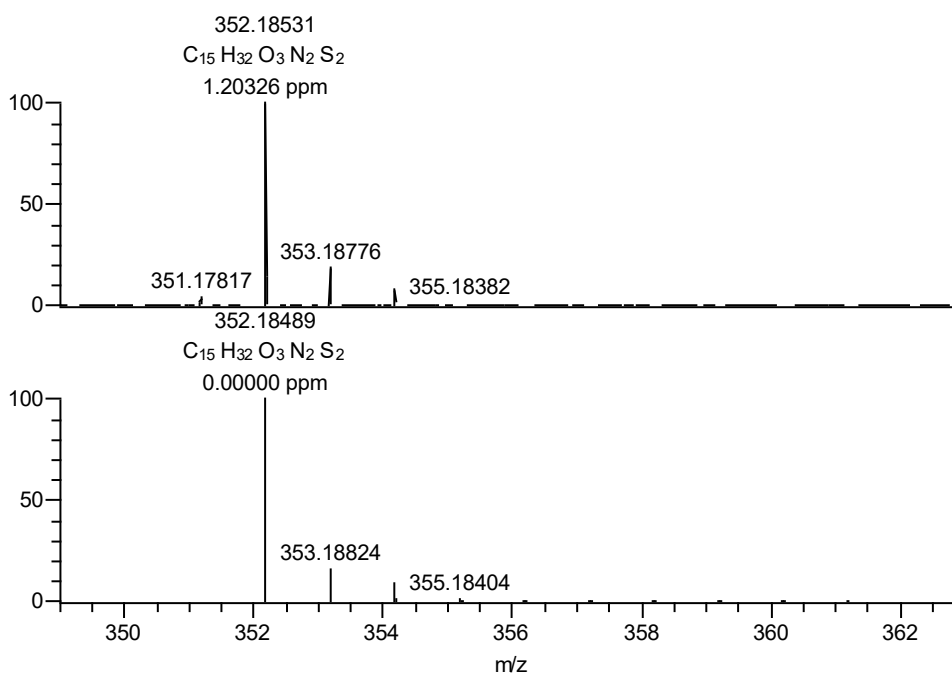

NL:  
3.52E8  
202001\_MAV-803#41-  
74 RT: 0.25-0.43 AV:  
34 T: FTMS + p ESI Full  
ms  
[100.0000-800.0000]

NL:  
7.53E5  
C<sub>15</sub>H<sub>31</sub>N<sub>2</sub>O<sub>3</sub>S<sub>2</sub> +H:  
C<sub>15</sub>H<sub>32</sub>N<sub>2</sub>O<sub>3</sub>S<sub>2</sub>  
pa Chrg 1

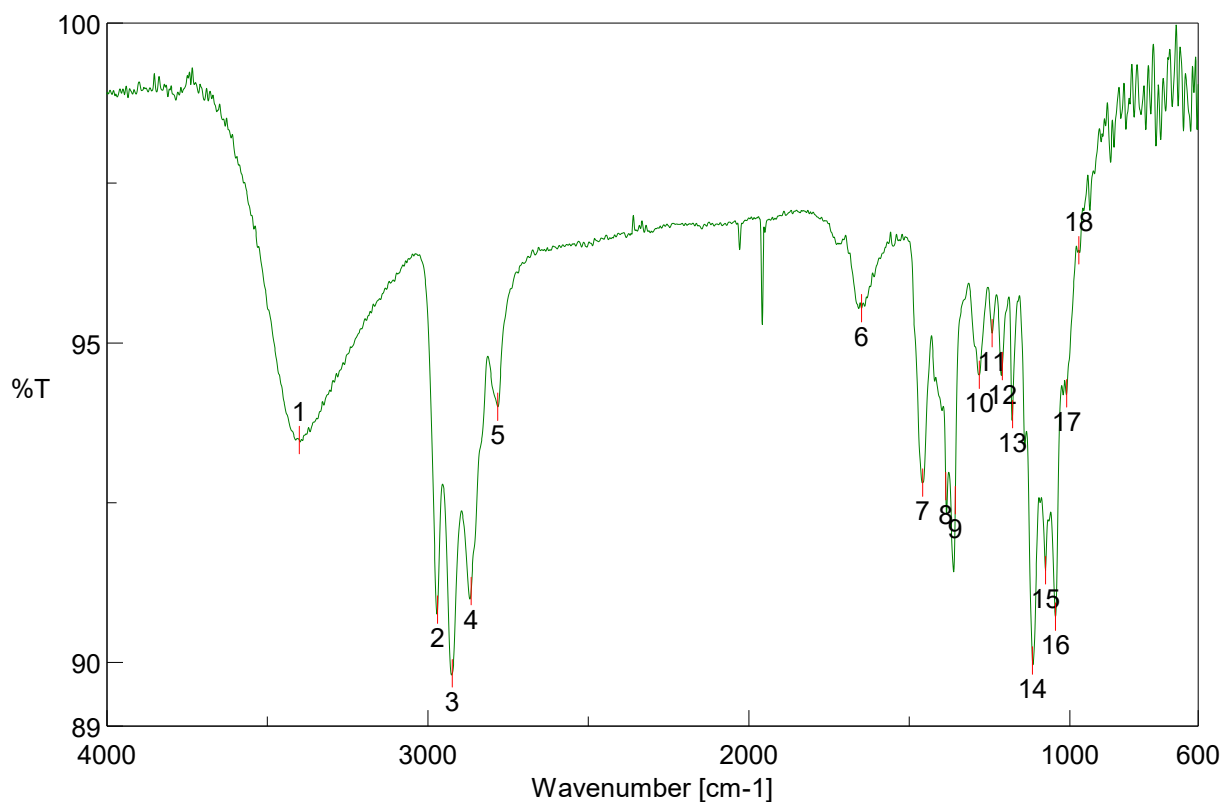

[Comments]

Sample name  
 Comment  
 User  
 Division  
 Company NCSU

[Detailed Information]

Creation date 10/11/2022 5:48 PM  
 Data array type Linear data array  
 Horizontal axis Wavenumber [cm-1]  
 Vertical axis %T  
 Start 0 cm-1  
 End 7800.65 cm-1  
 Data interval 0.964233 cm-1  
 Data points 8091

[Measurement Information]

Model Name FT/IR-4100typeA  
 Serial Number B096961016  
 Measurement Date 10/11/2022 5:37 PM  
 Light Source Standard  
 Detector TGS  
 Accumulation 8  
 Resolution 4 cm-1  
 Zero Filling On  
 Apodization Cosine  
 Gain Auto (2)  
 Aperture Auto (7.1 mm)  
 Scanning Speed Auto (2 mm/sec)  
 Filter Auto (30000 Hz)

[ Result of Peak Picking ]

| No. | Position | Intensity | No. | Position | Intensity |
|-----|----------|-----------|-----|----------|-----------|
| 1   | 3400.85  | 93.4741   | 2   | 2969.84  | 90.8233   |

[ Result of Peak Picking ]

| No. | Position | Intensity | No. | Position | Intensity |
|-----|----------|-----------|-----|----------|-----------|
| 3   | 2924.52  | 89.8238   | 4   | 2865.7   | 91.1106   |
| 5   | 2782.78  | 93.9991   | 6   | 1648.84  | 95.5389   |
| 7   | 1458.89  | 92.8094   | 8   | 1386.57  | 92.7568   |
| 9   | 1356.68  | 92.5361   | 10  | 1282.43  | 94.4963   |
| 11  | 1241.93  | 95.1489   | 12  | 1210.11  | 94.6337   |
| 13  | 1178.29  | 93.8808   | 14  | 1116.58  | 90.026    |
| 15  | 1076.08  | 91.4403   | 16  | 1044.26  | 90.7129   |
| 17  | 1009.55  | 94.2048   | 18  | 971.947  | 96.4464   |

High resolution mass spectrometry and infrared spectroscopy data for 3-(2-Hydroxyethylamino)-1-oxyl-2,2,5,5-tetramethylpyrrolidine **26**

**Full Scan Positive Ion Mode**

| Sample | M <sub>Theoretical</sub> | M <sub>Experimental</sub> | ΔM (ppm) | Elemental Composition                                         |
|--------|--------------------------|---------------------------|----------|---------------------------------------------------------------|
|        | 202.16758                | 202.16735                 | -1.148   | C <sub>10</sub> H <sub>21</sub> N <sub>2</sub> O <sub>2</sub> |
|        | [M+H] <sup>+</sup>       | [M+H] <sup>+</sup>        |          |                                                               |

220165\_MJV842\_SYR#2-139 RT: 0.01-0.62 AV: 138 NL: 3.21E9

T: FTMS + p ESI Full ms [180.0000-2000.000]

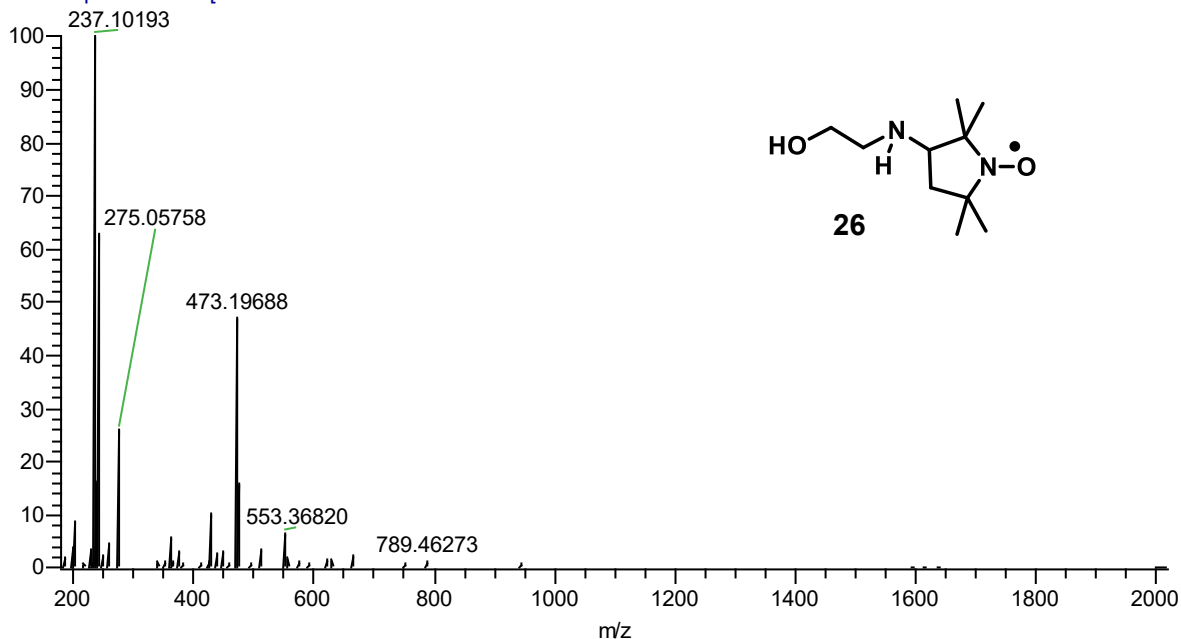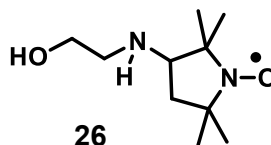

**Experimental and Theoretical Isotopic Distribution for C<sub>10</sub>H<sub>21</sub>N<sub>2</sub>O<sub>2</sub> [M+H]<sup>+</sup>**

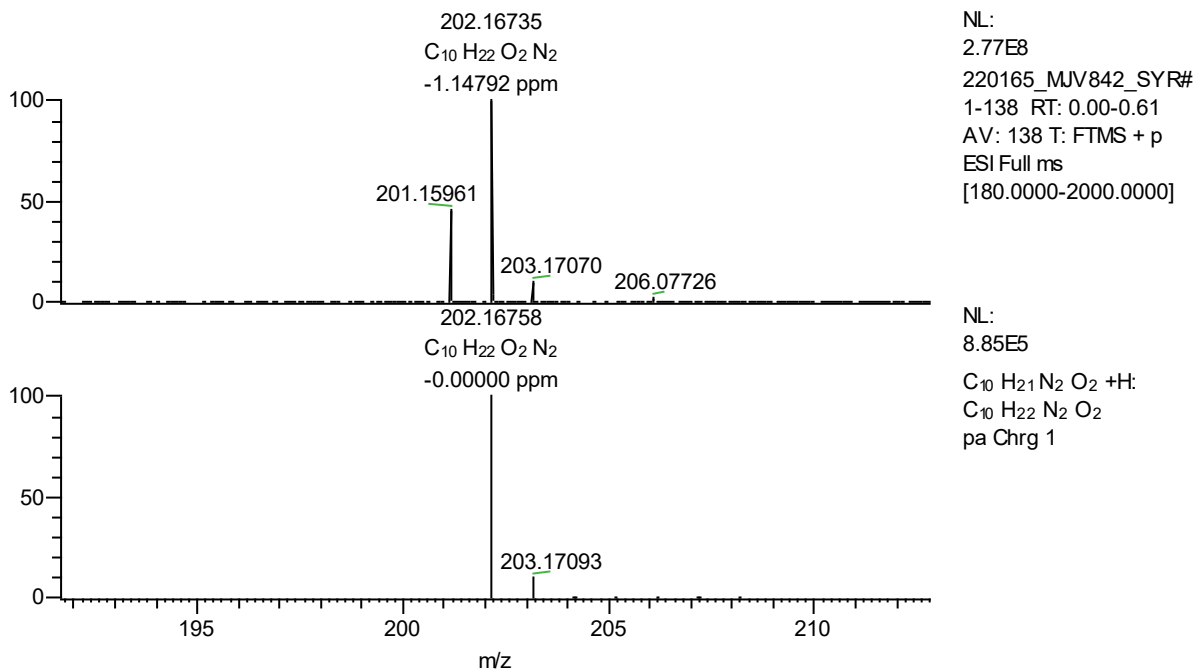



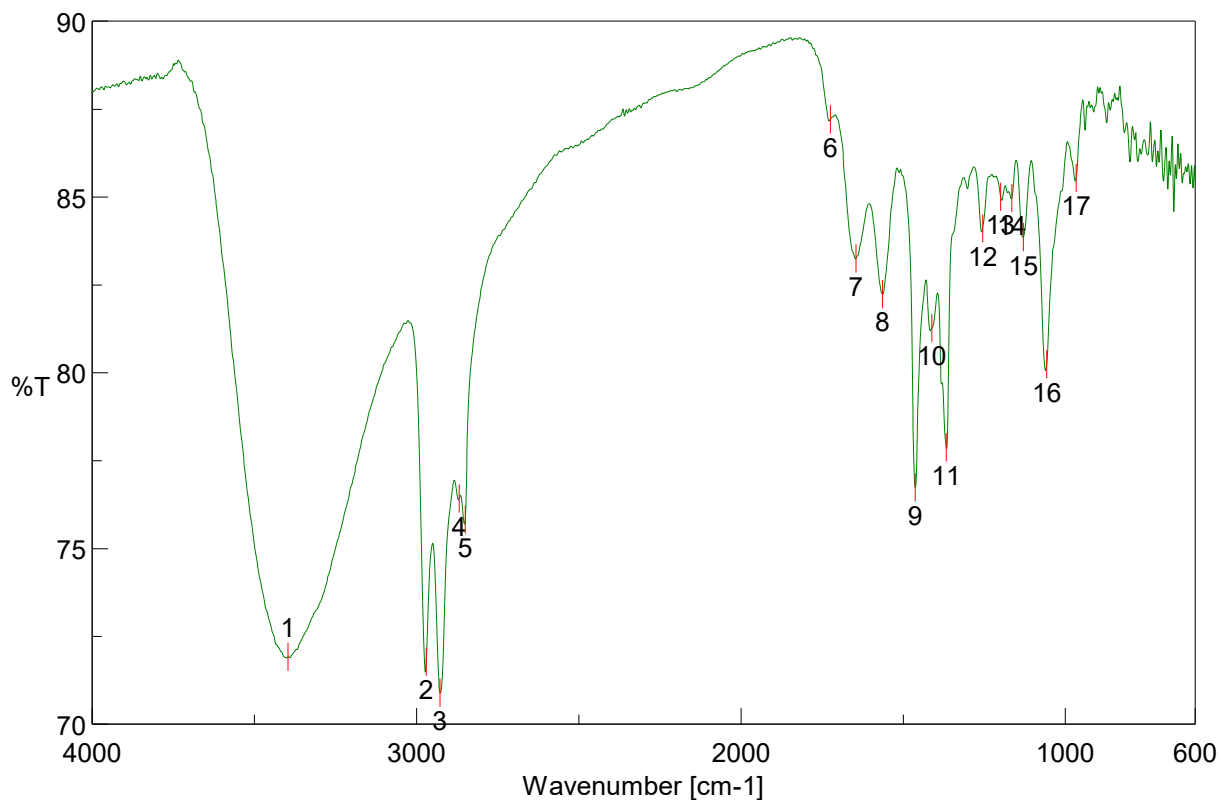

[Comments]

Sample name  
 Comment  
 User  
 Division  
 Company NCSU

[Detailed Information]

Creation date 10/13/2022 6:52 PM  
 Data array type Linear data array  
 Horizontal axis Wavenumber [cm-1]  
 Vertical axis %T  
 Start 0 cm-1  
 End 7800.65 cm-1  
 Data interval 0.964233 cm-1  
 Data points 8091

[Measurement Information]

Model Name FT/IR-4100typeA  
 Serial Number B096961016  
 Measurement Date 10/13/2022 6:52 PM  
 Light Source Standard  
 Detector TGS  
 Accumulation 8  
 Resolution 4 cm-1  
 Zero Filling On  
 Apodization Cosine  
 Gain Auto (2)  
 Aperture Auto (7.1 mm)  
 Scanning Speed Auto (2 mm/sec)  
 Filter Auto (30000 Hz)

[ Result of Peak Picking ]

| No. | Position | Intensity | No. | Position | Intensity |
|-----|----------|-----------|-----|----------|-----------|
| 1   | 3396.03  | 71.9117   | 2   | 2969.84  | 71.7716   |

[ Result of Peak Picking ]

| No. | Position | Intensity | No. | Position | Intensity |
|-----|----------|-----------|-----|----------|-----------|
| 3   | 2927.41  | 70.8953   | 4   | 2868.59  | 76.4173   |
| 5   | 2850.27  | 75.8207   | 6   | 1724.05  | 87.2067   |
| 7   | 1645.95  | 83.2434   | 8   | 1563.99  | 82.2379   |
| 9   | 1462.74  | 76.738    | 10  | 1411.64  | 81.2661   |
| 11  | 1367.28  | 77.8776   | 12  | 1255.43  | 84.0989   |
| 13  | 1199.51  | 85.0005   | 14  | 1164.79  | 84.9654   |
| 15  | 1130.08  | 83.8567   | 16  | 1057.76  | 80.2344   |
| 17  | 967.126  | 85.5389   |     |          |           |

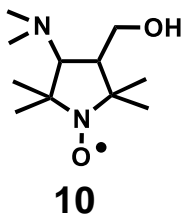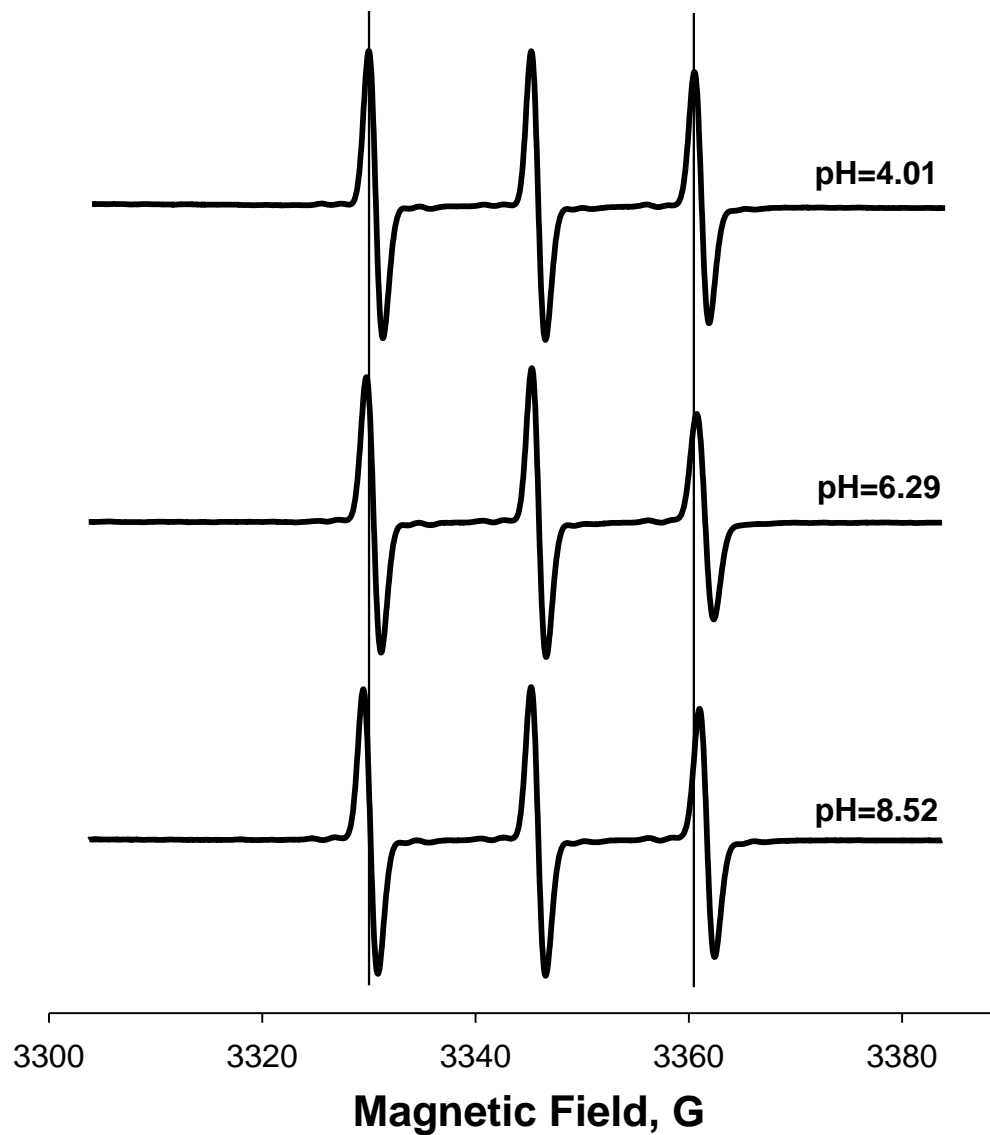

X-band (9.5 GHz) EPR spectra of the nitroxide **10** ( $pK_a=6.25\pm 0.01$ ) in 50 mM phosphate buffer in fully protonated (pH=4.01) and non-protonated (pH=8.52) forms, and at pH=6.29 which is close to the  $pK_a$  value. Spectra were recorded at 17 °C. Vertical lines are shown as a guide for an eye.

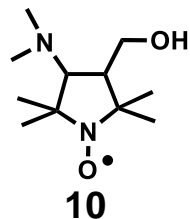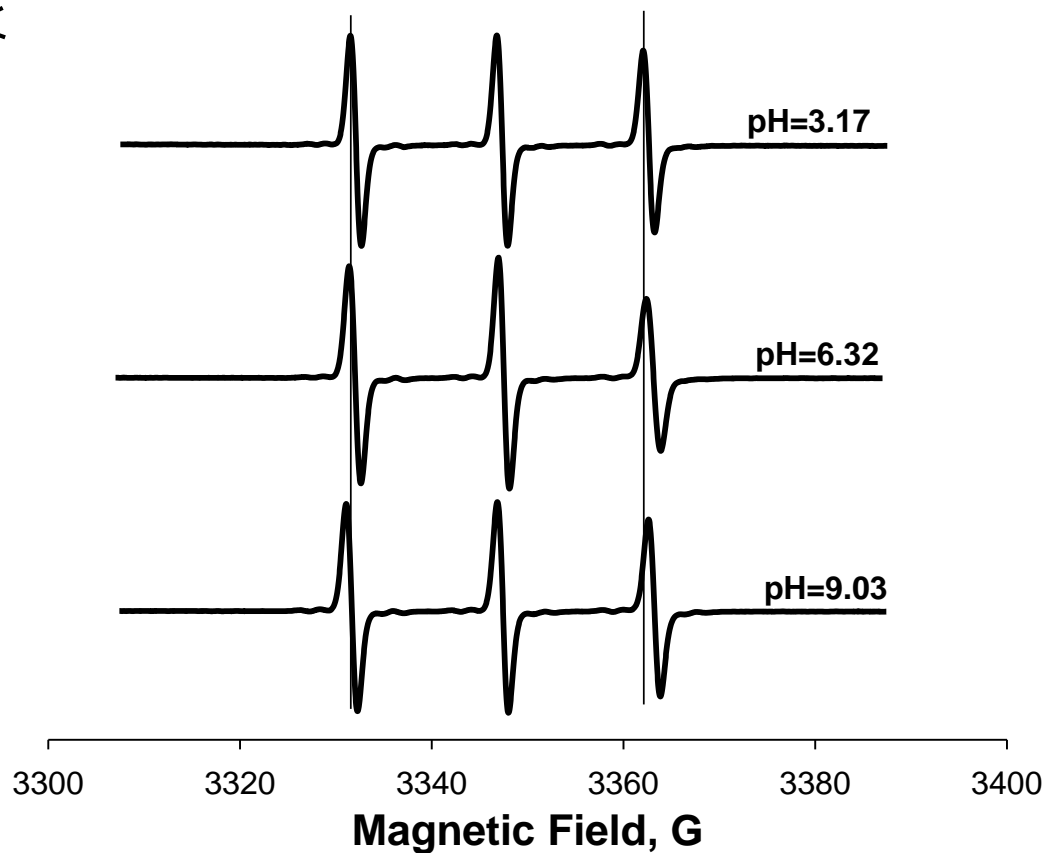

X-band (9.5 GHz) EPR spectra of the nitroxide **10** ( $pK_a=6.25\pm 0.01$ ) in 50 mM NaCl solution in fully protonated (pH=3.17) and non-protonated (pH=9.03) forms, and at pH=6.32 which is close to the  $pK_a$  value. Spectra were recorded at 17 °C. Vertical lines are shown as a guide for an eye.

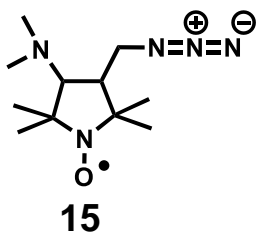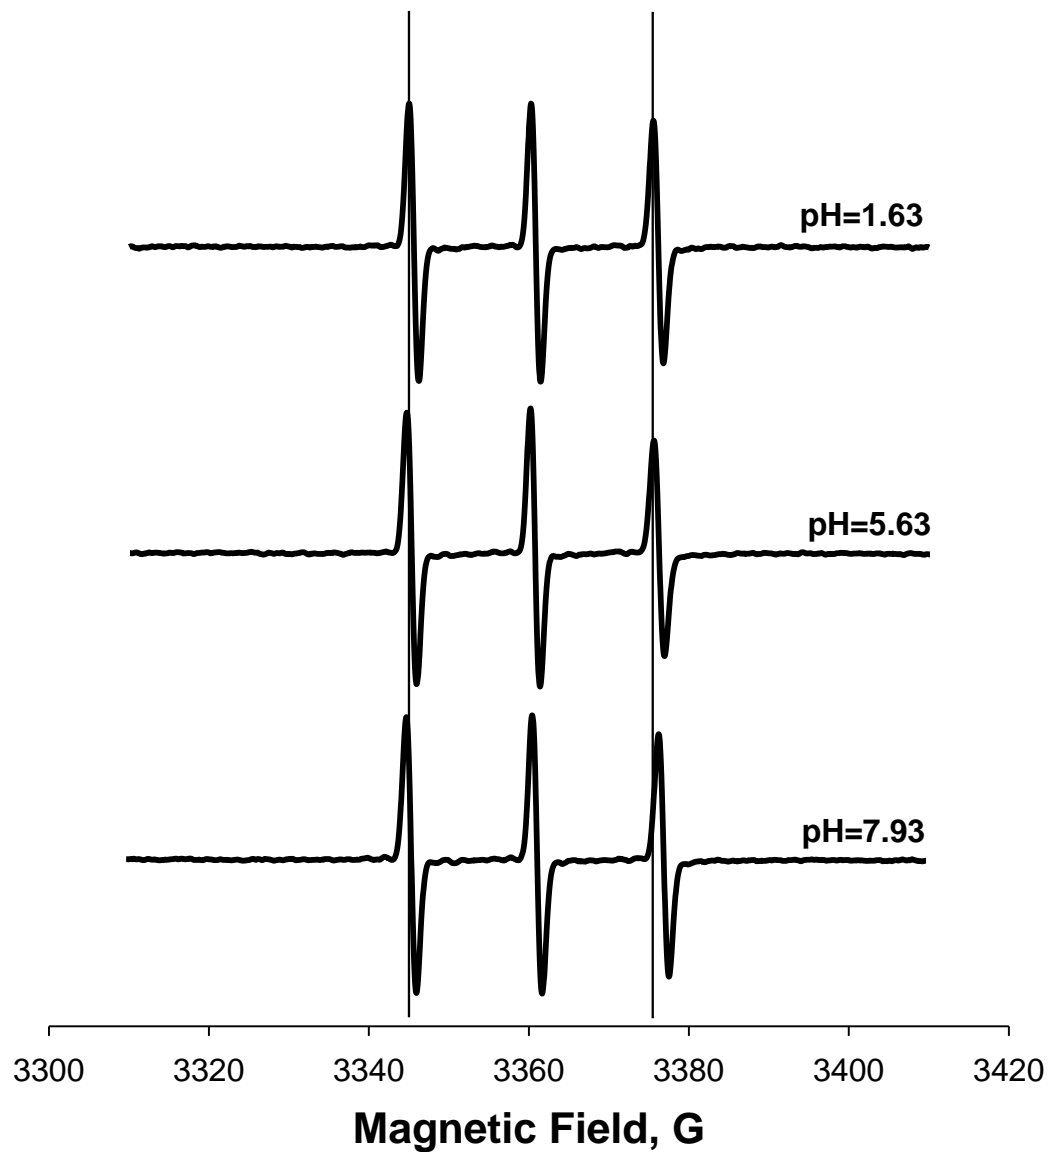

X-band (9.5 GHz) EPR spectra of the nitroxide **15** ( $pK_a=5.80\pm 0.02$ ) in 50 mM phosphate buffer in fully protonated (pH=1.63) and non-protonated (pH=7.93) forms, and at pH=5.63 which is close to the  $pK_a$  value. Spectra were recorded at 17 °C. Vertical lines are shown as a guide for an eye.

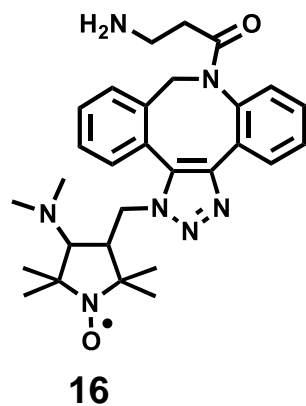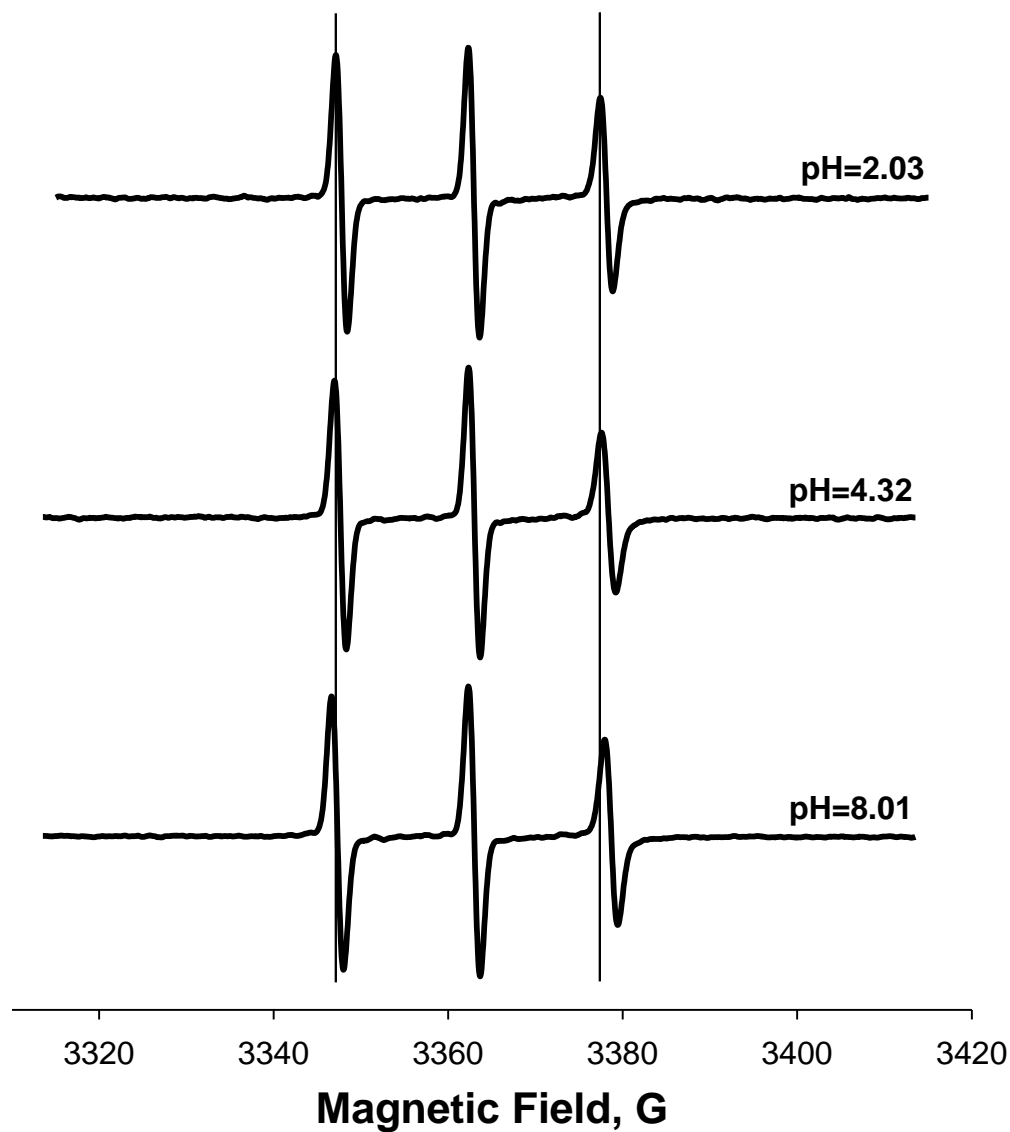

X-band (9.5 GHz) EPR spectra of the nitroxide **16** ( $pK_a=4.44\pm 0.02$ ) in 50 mM phosphate buffer in fully protonated (pH=2.03) and non-protonated (pH=8.01) forms, and at pH=4.32 which is close to the  $pK_a$  value. Spectra were recorded at 17 °C. Vertical lines are shown as a guide for an eye. S72

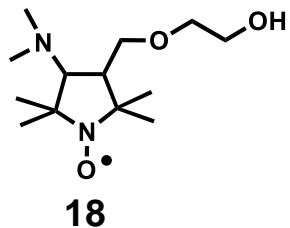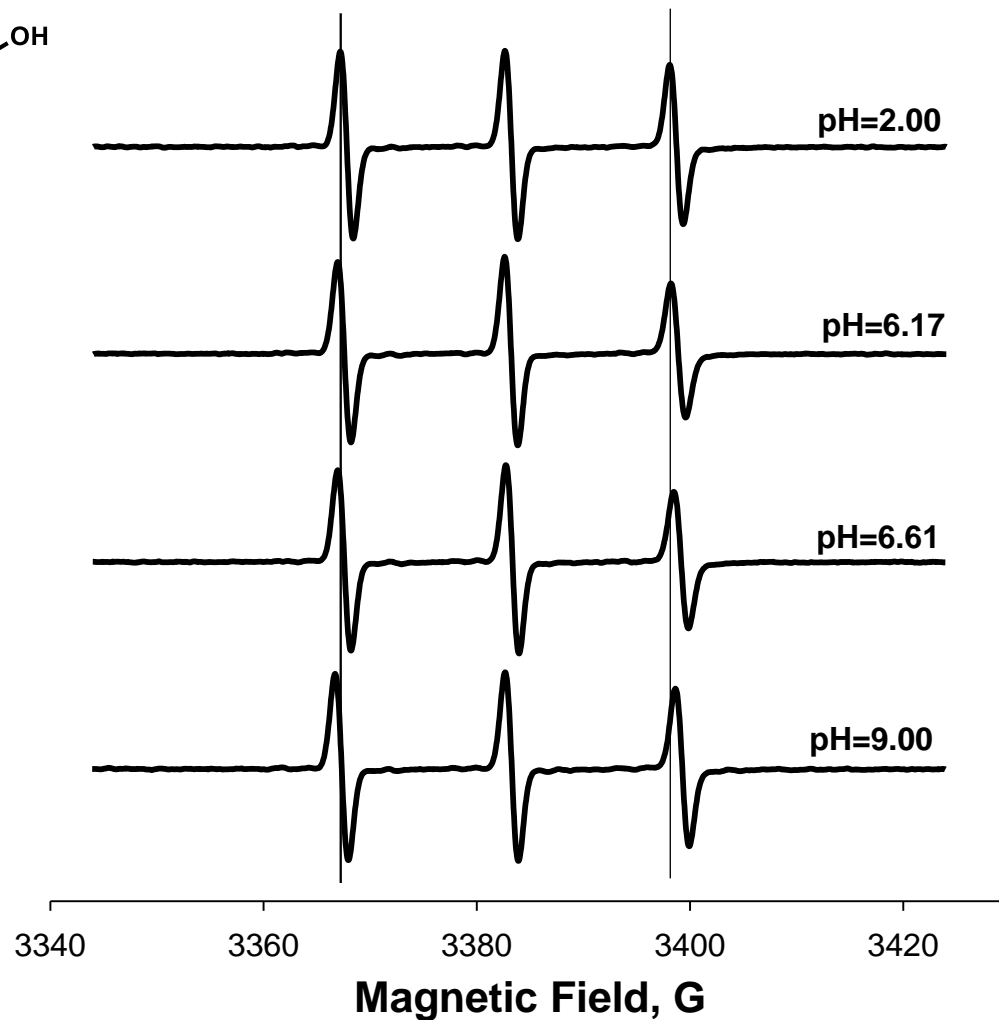

X-band (9.5 GHz) EPR spectra of the nitroxide **18** ( $pK_a=6.39\pm 0.01$ ) in 50 mM phosphate buffer in fully protonated (pH=2.00) and non-protonated (pH=9.00) forms, and at pH=6.17 and pH=6.61 which are close to the  $pK_a$  value. Spectra were recorded at 17 °C. Vertical lines are shown as a guide for an eye.

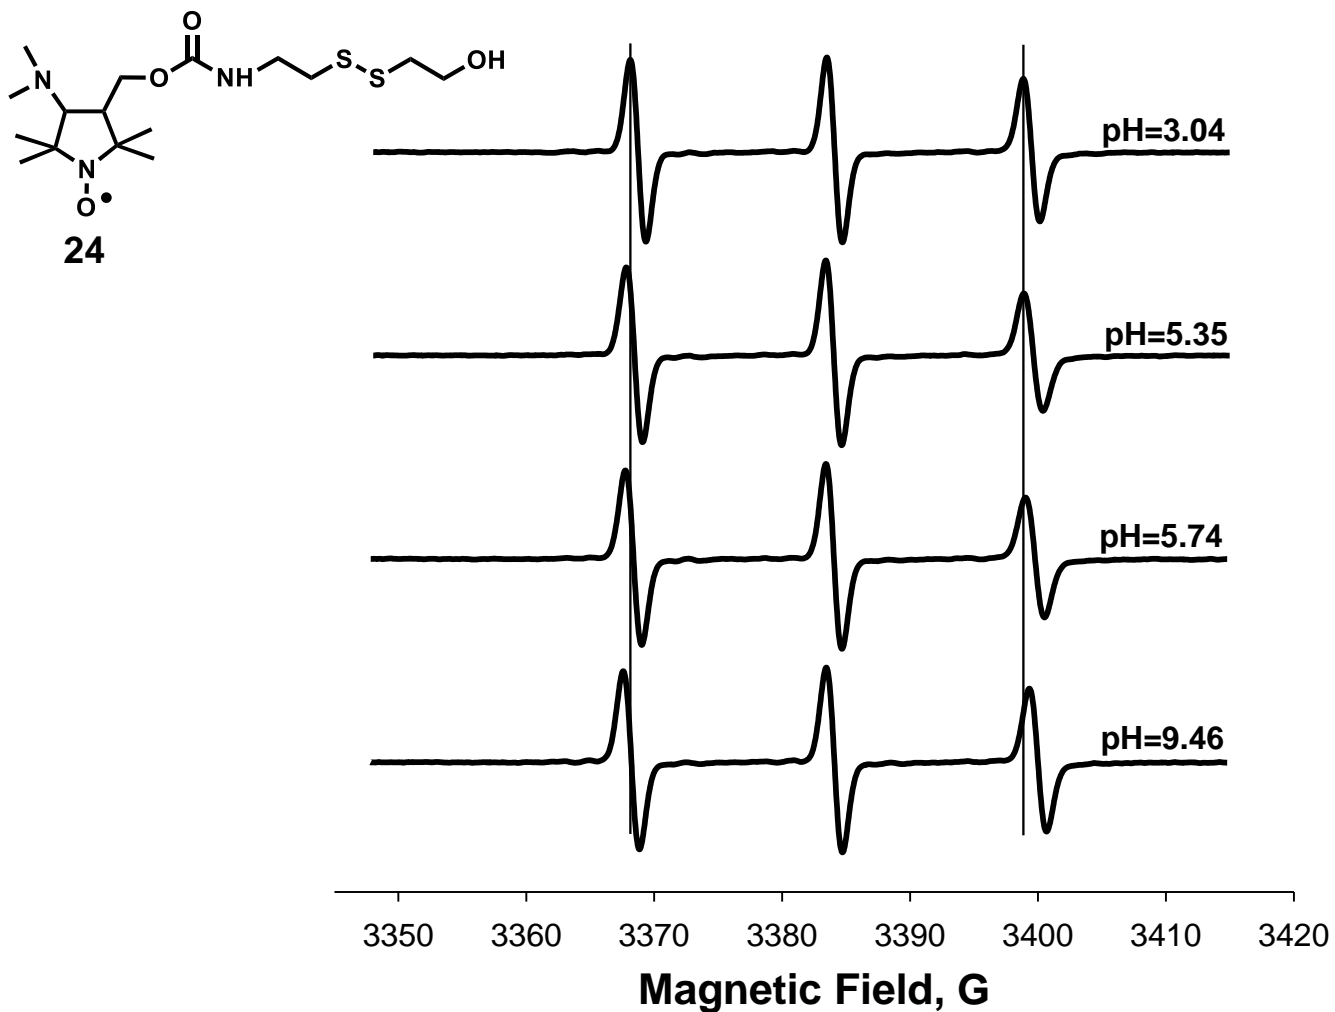

X-band (9.5 GHz) EPR spectra of the nitroxide **24** ( $pK_a=5.51\pm 0.03$ ) in 50 mM phosphate buffer in fully protonated (pH=3.04) and non-protonated (pH=9.46) forms, and at pH=5.35 and pH=5.74 which are close to the  $pK_a$  value. Spectra were recorded at 17 °C. Vertical lines are shown as a guide for an eye.



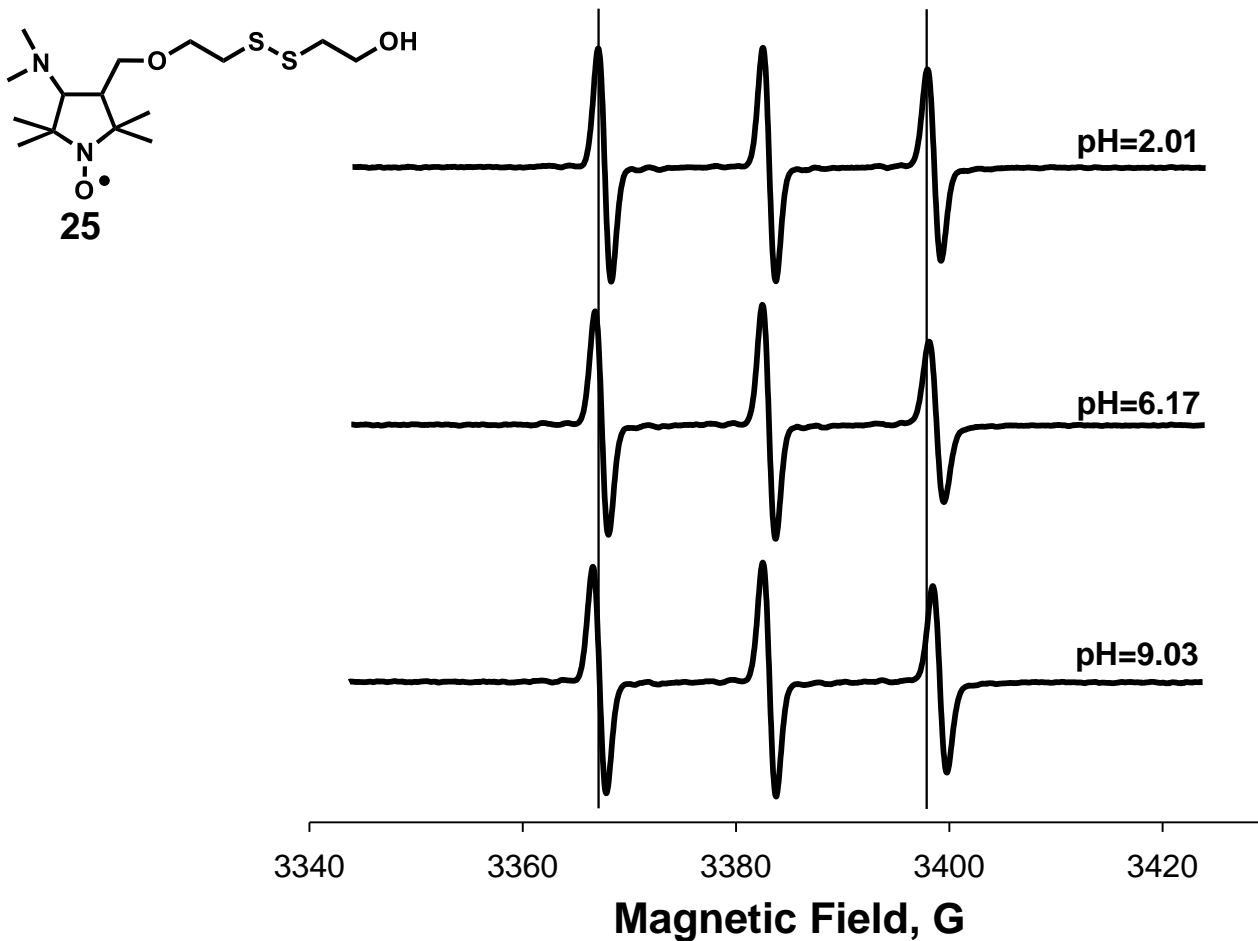

X-band (9.5 GHz) EPR spectra of the nitroxide **25** ( $pK_a=6.22\pm 0.06$ ) in 50 mM phosphate buffer in fully protonated (pH=2.01) and non-protonated (pH=9.03) forms, and at pH=6.17 which is close to the  $pK_a$  value. Spectra were recorded at 17 °C. Vertical lines are shown as a guide for an eye.

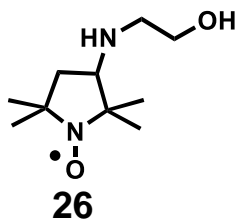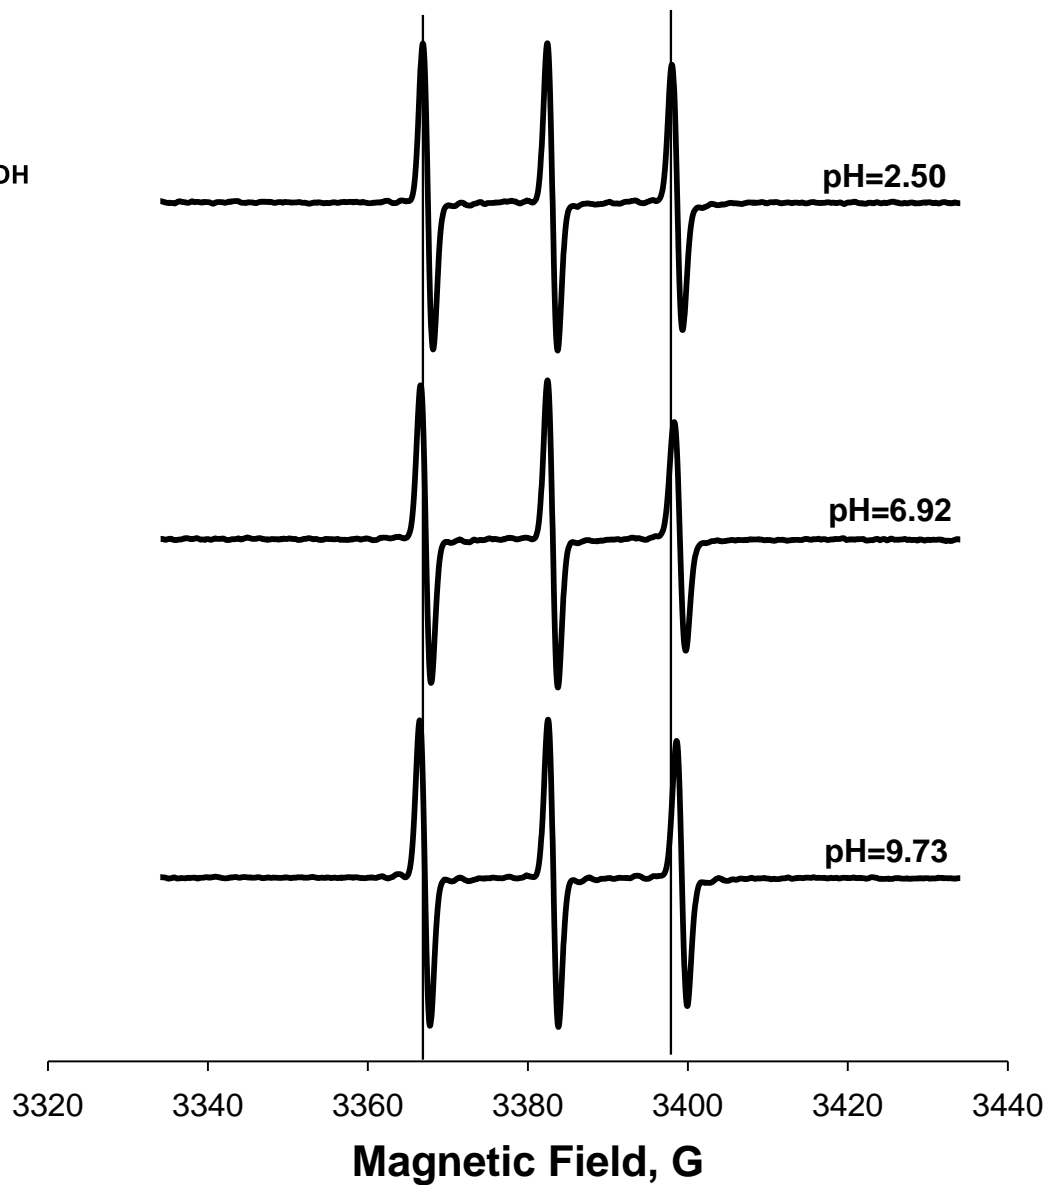

X-band (9.5 GHz) EPR spectra of the nitroxide **26** ( $pK_a=6.73\pm 0.01$ ) in 50 mM phosphate buffer in fully protonated (pH=2.50) and non-protonated (pH=9.73) forms, and at pH=6.92 which is close to the  $pK_a$  value. Spectra were recorded at 17 °C. Vertical lines are shown as a guide for an eye.
